# Supplementary material for: Characteristics of pharmacist’s interventions triggered by prescribing errors related to computerised physician order entry in French hospitals: a cross-sectional observational study
Source: PubMed Central journal article supplement — BMJ Open. 2021 Oct 10;11(10):e045778. doi: 10.1136/bmjopen-2020-045778 (PMC8506887; doi:10.1136/bmjopen-2020-045778), 2021-10-10
Supplement: bmjopen-2020-045778.draft_revisions.pdf [file bmjopen-2020-045778.draft_revisions.pdf]

# BMJ Open

BMJ Open is committed to open peer review. As part of this commitment we make the peer review history of every article we publish publicly available.

When an article is published we post the peer reviewers' comments and the authors' responses online. We also post the versions of the paper that were used during peer review. These are the versions that the peer review comments apply to.

The versions of the paper that follow are the versions that were submitted during the peer review process. They are not the versions of record or the final published versions. They should not be cited or distributed as the published version of this manuscript.

BMJ Open is an open access journal and the full, final, typeset and author-corrected version of record of the manuscript is available on our site with no access controls, subscription charges or pay-per-view fees (<http://bmjopen.bmj.com>).

If you have any questions on BMJ Open's open peer review process please email [info.bmjopen@bmj.com](mailto:info.bmjopen@bmj.com)

# BMJ Open

## Characteristics of Pharmacist's interventions triggered by prescribing errors related to computerized physician order entry in French hospitals: a cross-sectional observational study

|                               |                                                                                                                                                                                                                                                                                                                                                                                                                                                                                                                                                    |
|-------------------------------|----------------------------------------------------------------------------------------------------------------------------------------------------------------------------------------------------------------------------------------------------------------------------------------------------------------------------------------------------------------------------------------------------------------------------------------------------------------------------------------------------------------------------------------------------|
| Journal:                      | <i>BMJ Open</i>                                                                                                                                                                                                                                                                                                                                                                                                                                                                                                                                    |
| Manuscript ID                 | bmjopen-2020-045778                                                                                                                                                                                                                                                                                                                                                                                                                                                                                                                                |
| Article Type:                 | Original research                                                                                                                                                                                                                                                                                                                                                                                                                                                                                                                                  |
| Date Submitted by the Author: | 12-Oct-2020                                                                                                                                                                                                                                                                                                                                                                                                                                                                                                                                        |
| Complete List of Authors:     | Videau, Manon; TIMC-IMAG, CNRS-UMR 5525/ThEMAS/Université Grenoble Alpes; CHU Grenoble Alpes, Pharmacie<br>Charpiat, Bruno; TIMC-IMAG, CNRS-UMR 5525/ThEMAS/Université Grenoble Alpes; Hopital de la Croix-Rousse, Pharmacie<br>Vermorel, Céline; TIMC-IMAG, CNRS-UMR 5525/ThEMAS/Université Grenoble Alpes<br>Bosson, J.L; TIMC-IMAG, CNRS-UMR 5525/ThEMAS/Université Grenoble Alpes<br>Conort, Ornella; Hopital Cochin, Pharmacie<br>Bedouch, Pierrick; TIMC-IMAG, CNRS-UMR 5525/ThEMAS/Université Grenoble Alpes; CHU Grenoble Alpes, Pharmacie |
| Keywords:                     | Health & safety < HEALTH SERVICES ADMINISTRATION & MANAGEMENT, Adverse events < THERAPEUTICS, Health informatics < BIOTECHNOLOGY & BIOINFORMATICS                                                                                                                                                                                                                                                                                                                                                                                                  |
|                               |                                                                                                                                                                                                                                                                                                                                                                                                                                                                                                                                                    |

SCHOLARONE™  
Manuscripts

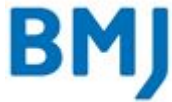

I, the Submitting Author has the right to grant and does grant on behalf of all authors of the Work (as defined in the below author licence), an exclusive licence and/or a non-exclusive licence for contributions from authors who are: i) UK Crown employees; ii) where BMJ has agreed a CC-BY licence shall apply, and/or iii) in accordance with the terms applicable for US Federal Government officers or employees acting as part of their official duties; on a worldwide, perpetual, irrevocable, royalty-free basis to BMJ Publishing Group Ltd ("BMJ") its licensees and where the relevant Journal is co-owned by BMJ to the co-owners of the Journal, to publish the Work in this journal and any other BMJ products and to exploit all rights, as set out in our [licence](#).

The Submitting Author accepts and understands that any supply made under these terms is made by BMJ to the Submitting Author unless you are acting as an employee on behalf of your employer or a postgraduate student of an affiliated institution which is paying any applicable article publishing charge ("APC") for Open Access articles. Where the Submitting Author wishes to make the Work available on an Open Access basis (and intends to pay the relevant APC), the terms of reuse of such Open Access shall be governed by a Creative Commons licence – details of these licences and which [Creative Commons](#) licence will apply to this Work are set out in our licence referred to above.

Other than as permitted in any relevant BMJ Author's Self Archiving Policies, I confirm this Work has not been accepted for publication elsewhere, is not being considered for publication elsewhere and does not duplicate material already published. I confirm all authors consent to publication of this Work and authorise the granting of this licence.

1  
2  
3 **Characteristics of Pharmacist's interventions triggered by prescribing errors related to**  
4 **computerized physician order entry in French hospitals: a cross-sectional observational study**  
5  
6  
7

8 Manon Videau<sup>1,2</sup>, Bruno Charpiat<sup>1,3</sup>, Céline Vermorel<sup>1</sup>, Jean-Luc Bosson<sup>1</sup>, Ornella Conort<sup>4</sup>, and Pierrick  
9 Bedouch<sup>1,2</sup> on behalf of the SFPC VIP– Act-IP© group<sup>5</sup>

10 <sup>1</sup>Université Grenoble Alpes, CNRS/TIMC-IMAG UMR5525/ThEMAS, F-38041, Grenoble, France

11 <sup>2</sup>Pharmacy Department, Grenoble Alpes University Hospital, 38043, Grenoble, France

12 <sup>3</sup>Pharmacy Department, Hôpital Croix Rouse, Hospices civils de Lyon, 69004, Lyon, France

13 <sup>4</sup>Pharmacy Department, Hôpital Cochin, Assistance Publique Hôpitaux de Paris, 75879 Paris, France

14 <sup>5</sup>Working group “Valorization of Pharmaceutical Interventions/ Valorisation des Interventions  
15 Pharmaceutiques – Act-IP©” of the French Society for Clinical Pharmacy (see composition and  
16 members in acknowledgments)  
17  
18

19 **Corresponding author:**

20 Manon Videau

21 Université Grenoble Alpes

22 CNRS/TIMC-IMAG/UMR5525/ThEMAS, F-38041,

23 Grenoble, France

24 Email: videau.manon@gmail.com  
25  
26

27 **Keywords:** drug related problem, prescribing error, pharmacist intervention, computerized physician  
28 order entry (CPOE)  
29  
30

31 Abstract: 290/300 words

32 Main text: 2581/4000 words  
33  
34  
35  
36  
37  
38  
39  
40  
41  
42  
43  
44  
45  
46  
47  
48  
49  
50  
51  
52  
53  
54  
55  
56  
57  
58  
59  
60

## Abstract

### Objectives

Computerized physician order entry (CPOE) systems facilitate the review of medication orders by pharmacists. Reports have emerged that show conception flaws or the misuse of CPOE systems generate prescribing errors. We aimed to characterize pharmacist interventions (PIs) triggered by prescribing errors identified as system-related errors (SREs) in French hospitals.

### Design

This was a cross-sectional observational study based on PIs prospectively documented in the Act-IP© observatory database from January 2014 to December 2018.

### Setting

PISREs from 319 French computerized healthcare facilities were analyzed.

### Participants

Among the 319 French hospitals, 232 (72.7%), involving 652 (51%) pharmacists, performed SRE interventions.

### Results

Among the 331,678 PIs recorded, 27,058 were qualified as due to SREs (8.2%). The main drug-related problems associated with PISREs were suprathereapeutic (27.5%) and subtherapeutic dosage (17.2%), non-conformity with guidelines/contraindications (22.4%), and improper administration (17.9%). The PI prescriber acceptance rate was 78.9% for SREs versus 67.6% for other types of errors. Concerning the certification status of CPOE systems, the PISRE ratio was 9.4% for non-certified systems versus 5.5% for certified systems. The PISRE ratio for senior pharmacists was 9.2% and that for pharmacy residents 5.4%. Concerning prescriptions made by graduate prescribers and those made by residents, the PISRE ratio was 8.4 % and 7.8%, respectively.

### Conclusion

1  
2  
3 Computer-related prescribing errors are common. The PI acceptance rate by prescribers was higher than  
4 that observed for PIs that were not CPOE related. This suggests that physicians consider the potential  
5 clinical consequences of SREs for patients to be more frequently serious than interventions unrelated to  
6 CPOE. CPOE medication review requires continual pharmacist diligence to catch these errors. The  
7 significantly lower PISRE ratio for certified software should prompt patient safety agencies to undertake  
8 studies to identify the safest software and discard software that is potentially dangerous.  
9  
10  
11  
12  
13  
14  
15  
16  
17  
18  
19  
20  
21  
22  
23  
24  
25  
26  
27  
28  
29  
30  
31  
32  
33  
34  
35  
36  
37  
38  
39  
40  
41  
42  
43  
44  
45  
46  
47  
48  
49  
50  
51  
52  
53  
54  
55  
56  
57  
58  
59  
60

For peer review only

## Article Summary

### Strengths and limitations of this study

- This study provides an overview of prescribing issues related to the use of CPOE systems at the national level.
- Beyond this large register of prescribing problems related to CPOE use, this is the first study to evaluate pharmacist interventions in daily practice for such a large sample of interventions, pharmacists, and hospitals.
- This study focuses on declarative data based on interventions performed by hospital pharmacists.
- These pharmacist interventions highlight prescription problems, but they are not exhaustive.

## 1. Introduction

Every day, numerous hospitalized patients are subject to drug-related problems (DRPs), resulting in suboptimal therapy, suffering, and decreased quality of life, as well as high healthcare costs for society [1, 2]. Computerized physician order entry (CPOE) systems, along with clinical decision support systems, improve the safety, quality, and value of patient care [3]. According to a meta-analysis, CPOE systems have reduced hospital medication errors by approximately 12.5% [10.6-14.4%][4]. However, CPOE systems also have the potential to introduce or contribute to errors. Indeed, new mechanisms that lead to prescription errors have been identified with CPOE: wrong patient selection, failure to report drug allergies, incorrect entry or wrong selection of medication, dose, route, or time of administration, and confusing free-text comments [5-10].

In France, as in other countries, various incentives and requirements have been put in place to encourage computerized drug prescribing, such as France's "Digital Hospital" program [11]. Since the 2000s, prescribing errors associated with the use of CPOE have been slowly coming to light as healthcare has become increasingly computerized [9]. Compared to handwritten prescriptions, the analysis of electronic prescriptions requires a particular effort on the part of pharmacists and other health professionals to detect errors [9]. System-related errors (SREs) are defined as those in which the electronic prescribing system functionality or design contributed to the error, with little possibility that another cause, such as lack of knowledge, produced the error. For example, an order for an inappropriate drug located on a drop-down menu next to a likely drug selection is a system-related error [12].

A pharmacist intervention (PI) due to a SRE is defined as any PI resulting from the identification of a prescribing error by a pharmacist that would probably not have occurred in the context of a handwritten prescription and of which at least one cause is related to the use of a computer (software system configuration issue, software functionality issue, or software misuse) [13-16].

Most studies concerning PIs triggered by system-related prescribing errors were conducted within a single hospital [17-19]. As a result, it is not possible to assess the extent of prescribing errors related to electronic systems or draw conclusions about subsequent PIs at a national level.



1  
2  
3 In 2003, the French Society of Clinical Pharmacy (SFPC) developed and validated a tool for classifying  
4 and documenting clinical PIs [20]. This tool allows the reporting of DRPs and PIs performed during the  
5 daily review of medication orders [24]. In 2006, a website, Act-IP©, was created with the objectives to  
6  
7 (a) create a documentation system that is freely accessible to any pharmacist, through the French Society  
8 of Clinical Pharmacy Web site (<http://www.actip.sfpc.eu/actip/index/ficheip/>) and (b) pool the data  
9 recorded by all pharmacists to conduct epidemiological studies concerning DRPs detected by  
10 pharmacists [21]. The pooling of PIs constitutes an observatory of clinical pharmacy practices, called  
11 the “Act-IP© Observatory”.

12  
13  
14  
15  
16  
17  
18  
19  
20  
21 The aim of this study was to characterize PIs triggered due to SREs in French hospitals between 2014  
22 and 2018. Our secondary objective was to determine the physician acceptance rate and its frequency  
23 according to the certification status (certified versus non-certified) of the CPOE systems.  
24  
25  
26  
27

## 28 **2. Methods**

### 29 *2.1. Study design*

30  
31  
32 This was a cross-sectional observational study using PIs prospectively documented in the Act-IP©  
33 observatory over a five-year period from January 1, 2014 to December 31, 2018. The main outcome was  
34 a PI due to a SRE (PISRE) reported by French hospital pharmacists on the Act-IP© observatory. Ethical  
35 approval for the study was obtained on February 19, 2020 (CECIC Rhône-Alpes-Auvergne, Clermont-  
36 Ferrand, IRB 5891).  
37  
38  
39  
40  
41  
42

### 43 *2.2. Data sources*

44  
45 The data comes from the Act-IP© Observatory. Based on the SFPC criteria, using the report form  
46 developed and validated for routine documentation of the PIs, Act-IP© users completed the online report  
47 form notifying the date, type of DRP, PI, type of drug involved (according to the ATC (Anatomical  
48 Therapeutic Chemical) classification), acceptance of the intervention by the prescriber, and free-text  
49 details of the context. Ten categories were determined for DRPs and seven for PIs (Appendix 1). A PI  
50 was considered to be “accepted” if the physician took it into account and modified the prescription as  
51 suggested by the pharmacist or “refused” if the prescription remained unchanged, including cases of  
52  
53  
54  
55  
56  
57  
58  
59  
60

1  
2  
3 expressed refusal by the prescriber. If acceptance of the intervention was impossible to ascertain (i.e.  
4 discharged patients or those transferred to another ward before acceptance), the PI was noted as “not  
5 assessable”. The pharmacist’s academic background, hospital characteristics, and software used were  
6 documented online by the pharmacist when he/she registered onto the Act-IP© website. Since July 2013,  
7 pharmacists have been able to indicate whether the DRP was “related to the electronic system” or not  
8 for each registered PI. For the purpose of this study, DRPs identified as “related to the electronic system”  
9 were considered to be PISREs.  
10  
11  
12  
13  
14  
15  
16  
17

18 French law made the certification of CPOE systems mandatory on December 29, 2011. However, two  
19 decrees abolished this obligation in 2017. Certification is now based on the sole initiative of the software  
20 developer. Forty-eight hospital CPOE software packages are currently certified by the agency for patient  
21 safety [Haute Autorité de Santé (HAS)] [22]. For our analysis, PIRSEs were classified according to the  
22 HAS status of the CPOE system (certified versus not certified).  
23  
24  
25  
26  
27  
28  
29

### 30 2.3. Analysis

31 The PISRE ratio was estimated relative to the total number of PIs. Proportions were compared using the  
32 chi-square test. PISREs coded as “refused” or “not assessable” were combined and compared to the  
33 accepted PISREs. Probability values < 0.001 were considered to be statistically significant. Statistical  
34 analyses were performed using Stata 13 (Stata Corporation, College Station, Texas, USA). Several  
35 qualitative examples are given to illustrate PISREs.  
36  
37  
38  
39  
40  
41  
42

## 43 4. Results

44 From January 2014 to December 2018, 331,678 PIs were entered into the Act-IP© observatory. Among  
45 them, 27,058 (8.2%) were indicated to be system-related prescribing errors (Figure 1).  
46  
47  
48  
49

50 Over the study period, 1,219 pharmacists from 319 hospitals recorded PIs in the Act-IP© observatory  
51 database. The geographical location of the hospitals involved is shown in Figure 2. Among them, 232  
52 (72.7%), involving 652 (51%) pharmacists, performed SRE interventions. Among the 319 hospitals, 87  
53 (27.3%) did not qualify any PIs as being due to a SRE. PIs come from 82 software involving 19 certified  
54 systems.  
55  
56  
57  
58  
59  
60

1  
2  
3 The characteristics of the PISREs are summarized in Table 1. The most commonly identified type of  
4  
5  
6  
7  
8  
9  
10  
11  
12  
13  
14  
15  
16  
17  
18  
19  
20  
21  
22  
23  
24  
25  
26  
27  
28  
29  
30  
31  
32  
33  
34  
35  
36  
37  
38  
39  
40  
41  
42  
43  
44  
45  
46  
47  
48  
49  
50  
51  
52  
53  
54  
55  
56  
57  
58  
59  
60

The characteristics of the PISREs are summarized in Table 1. The most commonly identified type of  
DRP was “supratherapeutic dosage”, followed by “non-conformity with guidelines/contraindications”  
and “improper administration”. Among the 27,058 PISREs, 78.9% (n = 21,356) were accepted. The  
PISRE ratio was 9.4% for non-certified systems versus 5.5% for certified systems (p-value < 0.001).  
Table 2 presents examples of drug-related problems classified as being triggered by prescribing errors  
due to the CPOE system.

## 5. Discussion

This study provides an overview of prescription problems related to CPOE system used in French  
hospitals. It provides insights into the main situations and medications involved in computer-related  
prescribing problems detected by pharmacists by providing a broad description of PIs performed during  
the daily review of routine medication orders. One strength of this study is that it is based on a large  
number of hospitals scattered throughout France, as no prior study of such extent evaluating PIs in daily  
practice has been published.

### 5.1. PISRE rate

Our PISRE rate (8.2%) is within the range reported by Korb-Savoldelli et al. [19]. They analyzed peer-  
reviewed studies (n = 14) that quantitatively reported medication-prescription errors related to CPOE.  
The prevalence of CPOE system-related medication errors relative to all prescription medication errors  
ranged from 6.1 to 77.7% (median = 26.1% [IQR:17.6–42,1]) and was less than 6.3% relative to the  
number of prescriptions reviewed. Ours is the first large-scale descriptive study using an observatory  
hospital pharmacy practice database to study computer-related prescribing errors.

### 5.2. DRPs induced by CPOE

The main category of DRPs identified as PISREs were supratherapeutic (27.5%, 7,436) and  
subtherapeutic dosage (17.2%, 4,646), non-conformity to guidelines/hospitals' drug formularies (22.4%,  
6,069) (i.e. medication selection non-compliant with the hospital drug formulary), and improper  
administration (17.9%, 4,838) (i.e. incorrect or no formulation, wrong timing). According to Korb-  
Savoldelli et al., all studies reported “wrong dose” and “wrong drug” errors [19], with the “wrong dose”

1  
2  
3 error being that most frequently reported (from 7 to 67.4%, median = 31.5% [IQR:20.5–44.5]). Many of  
4 the prescription errors due to CPOE systems can have serious consequences for patients, depending on  
5 the clinical circumstances. Although some of are unlikely to occur (e.g. IV ketoprofen 150 ampoules/day  
6 instead of 150 mg/d), they nevertheless illustrate flaws in certain CPOE systems [23]. However, our  
7 data do not allow the discrimination between software errors, connection problems, and human error.  
8  
9  
10  
11  
12

### 13 14 15 *5.3. CPOE systems*

16 The proportion of PIs triggered by software-related prescription errors was higher for non-certified  
17 (9.4%) than certified software (5.5%). In France, certification tests produced by the HAS are intended  
18 to technically assess the functionality of the software in various situations, as the CPOE evaluation  
19 methodology simulates various clinical scenarios [24]. French regulations do not require CPOE  
20 developers to carry out usability studies before the systems are marketed. Nevertheless, despite the  
21 limitations of this type of certification criteria, which have already been highlighted [25], our results  
22 show that prescribing with CPOE-certified systems results in fewer prescription errors than prescribing  
23 with non-certified software. These results are consistent with those of other studies, i.e. all software is  
24 not equal and some is safer than others [26-28].  
25  
26  
27  
28  
29  
30  
31  
32  
33  
34  
35

### 36 37 *5.4. Prescribers*

38 The PISRE ratio was higher for prescriptions made by graduate prescribers (8.4%) than medical  
39 residents (7.8%) (p-value < 0.001). This finding is, at first glance, counterintuitive, as one would expect  
40 that a prescriber who has been practicing for several years in the same health facility would make fewer  
41 CPOE-related prescription errors with the software than a resident who has only been using the software  
42 for a few months. Observational studies show that medical residents make most prescriptions and  
43 transcribe them to the software prescription instructions of senior prescribers during the medical  
44 examination [29]. It is thus possible that, in some hospitals, senior physicians are only occasional users  
45 of the prescription software. According to Nerich et al., the occasional use of software (< 1 prescription  
46 per day) is a risk factor for prescription error (OR = 3.85, 95% CI [2.08-7.14]) [30]. Tolley described  
47 how a junior doctor remarked that there was no one he could ask for help with using the ePrescribing  
48 system, as he was “the most experienced person on this floor with regards to the ePrescribing system”.  
49  
50  
51  
52  
53  
54  
55  
56  
57  
58  
59  
60

1  
2  
3 She also described how one consultant admitted she had not “learnt how to prescribe properly” because  
4 she did not “use the system often enough and regularly enough to know the quirks and tweaks”. This  
5 consultant relied on her junior staff to prescribe on the system [31].  
6  
7  
8  
9

### 10 *5.5. Act-IP© Pharmacist’ users*

11  
12 The PISRE ratio for senior pharmacists (9.2%) was higher than that of pharmacy residents (5.4%). This  
13 is consistent with the results of a study performed in a UK teaching hospital showing that the likelihood  
14 of senior pharmacists identifying errors was greater than that of junior pharmacists [32] and in  
15 accordance with our expectations. A study concerning French pharmacy students showed that they trust  
16 the contribution of computerization to healthcare without critical analysis. This results in overconfidence  
17 in the computer tool, perceived to be reliable, and makes users less willing to search for the errors  
18 produced by this tool [33]. They are therefore not aware that the review of computerized prescription  
19 orders requires additional effort to identify prescription errors. This is the consequence of the lack of  
20 teaching/training about this subject in French pharmacy schools. This situation contrasts strikingly with  
21 the content of the curricula taught in the United Kingdom and USA, for example [34,35].  
22  
23  
24  
25  
26  
27  
28  
29  
30  
31  
32  
33

### 34 *5.6. Prescriber Acceptance rate*

35  
36 The rate of acceptance of PISREs by prescribers was 78.9% versus 67.6% for other PIs. This suggests  
37 that prescribers recognize the relevance of such interventions due to the potential clinical consequences  
38 of such prescription errors. This rate varies from 65.9 to 92% in studies of drug errors induced by  
39 computerized prescription [10, 14], suggesting that physicians consider the potential clinical  
40 consequences of SRE to patients to be more frequently serious than interventions unrelated to CPOE. In  
41 light of our findings, a CPOE-related prescription error is a factor that favors acceptance of the  
42 PI. These points warrant further studies.  
43  
44  
45  
46  
47  
48  
49  
50

### 51 *5.7. Limits*

52  
53 Our study had several limitations. First, it focused on declarative data based on interventions performed  
54 by hospital pharmacists. These PIs highlight prescription problems, but are not exhaustive. However,  
55 the large sample size probably provides a relatively precise vision of the problem at the national level.  
56  
57  
58  
59  
60

1  
2  
3 Second, several pharmacists analyzing the same drug prescriptions may not all track down the same  
4 problems. For example, the mean percentage of detected prescribing errors was 59% in a study involving  
5 57 hospital pharmacies, with a broad range of 7 to 88% between pharmacies [36]. In the absence of  
6 specific studies to determine the performance of pharmacists in detecting prescription errors induced by  
7 CPOE-system flaws and misuse, we are reduced to simply assuming that such variation may be  
8 observed. In addition, there are various definitions of PISREs in the literature [13-16]. This suggests  
9 that there is a certain level of subjectivity when a pharmacist characterizes a PI as being related to a  
10 computer-generated prescription. Among hospitals that entered the PIs on Act-IP©, 87 never qualified  
11 a PI as being a SRE. There are two possible explanations for this observation. The first, and relatively  
12 unlikely, is that the software is near perfect and that there was no misuse by prescribers. For example,  
13 the absence of PISREs for these hospitals could result from the absence of computer-related errors due  
14 to the use of high-performance software and/or appropriately trained prescribers. The second possibility  
15 is that pharmacists do not establish a link between certain prescription errors and misuse of the  
16 prescription software and/or its design flaws. Conversely, a high rate of PISREs for a given hospital  
17 may result from software conception flaws and/or misuse of the software by prescribers and pharmacists  
18 who are very aware of the role of CPOE-systems in generating prescription errors. Regardless of the  
19 considered scenario, it is important to remember that differences in PISRE rates may also be due to the  
20 quality of the training provided. Studies have shown that insufficient training on an ePrescribing system  
21 can contribute to errors [37, 38]. Tolley illustrated how pharmacists did not receive any formal training  
22 about the system after starting at a hospital trust and observed that no formal training was offered when  
23 pharmacists changed roles. It has been shown that training plays a role in the users' experience but there  
24 is a lack of published research in this area [31]. Thus, further research is warranted to lift the veil on  
25 these unknowns.

26  
27  
28  
29  
30  
31  
32  
33  
34  
35  
36  
37  
38  
39  
40  
41  
42  
43  
44  
45  
46  
47  
48  
49  
50  
51  
52 Our results highlight that prescribing problems related to computer software are common in France.  
53 This is a concern that affects most (if not all) CPOE systems currently being used and therefore all  
54 hospitals, to varying degrees. Identifying the most dangerous software appears to be a priority to  
55 improve the quality and safety of patient care.

## 6. Conclusion

Computer-related prescribing errors are common, with wrong dose being the most frequent type of error. Such errors concern all drug classes and have potentially serious adverse clinical consequences if they are not intercepted by pharmacists when performing their daily medication review. The message appears to be well received by prescribers who agree to change their prescription more frequently than for PIs not related to CPOE use. CPOE medication review requires additional pharmacist diligence to catch such errors. As the PISRE ratio is significantly lower for certified software, patient safety agencies should undertake studies to identify the safest software so as to discard software that is potentially dangerous.



### Author contributions

Manon Videau and Bruno Charpiat designed the study, performed the statistical analyses, interpreted the results, and wrote the first version of the manuscript. Céline Vermorel contributed to the design of the study, performed the statistical analyses, and revised the manuscript. Jean-Luc Bosson contributed to the design of the study and revised the manuscript. Ornella Conort contributed substantially to the interpretation of the data and contributed to the revision of the manuscript. Pierrick Bedouch designed the study, performed the statistical analyses, interpreted the results, and revised the manuscript.

### Acknowledgements

The authors would like to thank the team of THEMAS and VIP working group for assistance in this project. We thank the clinical pharmacists of the SFPC Act-IP© group who participated in the data collection.

Members of the working group “Valorization of Pharmaceutical Interventions/ Valorisation des Interventions Pharmaceutiques – Act-IP©” of the French Society for Clinical Pharmacy: Pierrick Bedouch (Grenoble), Magalie Bourdelin (Villefranche-sur-Saone), Bruno Charpiat (Lyon), Ornella Conort (Paris), Julien Gravoulet (Leyr), Audrey Janoly-Dumenil (Lyon), Michel Juste (Epernay), and Céline Mongaret (Reims).

Clinical pharmacists of the SFPC Act-IP© group who participated in the data collection: S. Abkhtaoui-Couriat (Corbie), B. Allard-Latour (Saint-Genis-Laval), C. Andrieu (Saint-Etienne), X. Armoiry (Lyon), E. Armoiry (Villeurbanne), D. Attivi (Neufchâteau), L. Audibert (Alix), A. Barbet (Amiens), M. Bascoulergue (Aulnay sous bois), C. Basselin (Saint-Genis-Laval), F. Baud (Paris), P. Bedouch (Grenoble), M. Belhout (Amiens), S. Benhaoua (Saint Denis), J. Beny (Alix), S. Berthet (Lyon), J. Berthou (Besancon), D. Bichard (Besancon), A.C. Blandin (Besancon), E. Blondel (Aix les Bains), S. Bonn Loue (Luneville), A. Bonvin (Lyon), F. Bouchand (Garches), P. Bouniot (Francheville), M. Bourdelin (Besancon), C. Bouret (Lyon), L. Bourguignon (Lyon), C. Bourne (Saint-Egrève), M. Bouteille (Lyon), J. Burdin (Lyon), C. Bureau (Alix), C. Bureau (Villeurbanne), M. Burgin (Luneville), M. Buyse (Paris), E. Cabaret (Hyerres), D. Cabelguenne (Pierre Benite), C. Capele (Saint André lez Lille), D. Carli (Vienne), I. Carpentier (Saint-Genis-Laval), E. Chambrey (Rang-du-Fliers), S. Chantel (Pierre Benite), N. Charhon (Vienne), B. Charpiat (Lyon), M. Chaumont (Le Chesnay), K. Civiletti (Martigues), B. Clerc (Besancon), M. Cleve (Vienne), R. Colomb (Saint-Etienne), C. Combe (Saint-Etienne), O. Conort (Paris), R. Contreras (Besancon), S. Crepin (Limoges), M. Creusat-Aube (Illkirch-Graffenstaden), A. Cuoq (Lyon), C. Decourcelle (Lomme), T. Delanoy (Vienne), C. Derharoutunian (Vienne), A. Deronze (Lyon); M. Desseignet (Lyon), S. Diallo (Le Chesnay), L. Dietrich (Strasbourg), A. Dory (Strasbourg), J. Dos-Reis (Paris), N. Duarte (Draveil), M.O. Duzanski (Strasbourg), L. Escofier (Mayenne), F. Fabre (Clermont-Ferrand), S.



1  
2  
3 Fare (Paris), J. Fillon (Paris), A. Fonteneau (Amiens), A. Fouquet (Vienne); A. Gadot (Lyon), H.  
4 Galtier (Vienne); I. Garreau (Epernay), C. Gerard (Francheville), R. Gervais (Saint Denis), O. Gloulou  
5 (Saint Denis), I. GraguebChatti (Vienne), A. Grass (Lyon), I. Gremeau (Clermont-Ferrand), P.Y.  
6 Grosse (Grasse), C. Guenaire (Rennes), F. Guerin (Aix les Bains), A. Guillermet (Lyon), S. Hannou  
7 (Illkirch-Graffenstaden), A. Henry (Lyon), G. Herbin (Bayeaux), N. Herment (Epernay), A.  
8 JanolyDumenil (Pierre Benite), C. Jarre (Vienne), L. Jovenaux (Martigues), M. Juste (Epernay), A.S.  
9 Kaczmarek (Clermont-Ferrand), W. KiniMatondo (Saint Denis), H. Labrosse (Lyon), C. Laillier  
10 (Strasbourg), E. Lamarre (Saint-Etienne), J. Lamoureux (Lyon), M. Laurent (Lyon), A. Le Bris (Le  
11 Chesnay), M. Le Duff (Rennes), R. Lecointre (Saint-Etienne), J. Lecompte (Grasse), M. Lefebvre  
12 (Lyon), A.L. Lepetit (Epernay), H. Lepont-Gilardi (Rennes), A. Lescoat (Villeurbanne), J.P. Levillain  
13 (Migennes), G. Liguori (Clermont-Ferrand), C. Lohier (Villeurbanne), C. Lupo (Lyon), J. Machon  
14 (Lyon), K. Maes (Vienne), G. Magerand (Villeurbanne), K. Mangerel (Epernay), S. Martelet (Saint-  
15 Etienne), D. Matanza (Francheville), V. Mermet (Saint-Genis-Laval), C. Mouchoux (Villeurbanne), Y.  
16 Nivoix (Strasbourg), A. Orly (Paris), E. Orng (Lyon), A. Oufella (Aulnay Sous Bois), I. Paillole  
17 (Toulouse), D. Pallot (Saint Denis), A. Papon (Lyon), L. Parnet (Paris), M. Paysant (Saint-Genis-  
18 Laval), E. Perrier-Cornet (Illkirch-Graffenstaden), S. Perrin (Besancon), D. Peynaud (Lyon), B.N.  
19 Pham (Vienne), D. Piney (Luneville), A. Pohyer (Montpellier), C. Porot (Besancon), J. Pouzoulet  
20 (Créteil), L. Poy (Lyon), E. Prevost (Epernay), E. Prunier (Besancon), F. Ranchon (Lyon), M. Rave  
21 (Besancon), C. Remonnay (Besancon), M. Remy (Ho-Chi-Minh Ville), M. Rhalimi (Chaumont-en-  
22 Vexin), C. Rioufol (Pierre Benite), A. Robelet (Paris), S. Roche (Epernay), F.X. Rose (Saint-Avé), R.  
23 Roubille (Vienne), A. Sambarino (Bourgoin Jallieu), D. Sankhare (Saint Denis), R. Santucci  
24 (Strasbourg), J. Scholler (Strasbourg), R. Selmi (Saint Denis), C. Stamm (Pierre Benite), C. Tanguy  
25 (Brest), D. Tessier (Saint Denis), H. Thery (Rang-du-Fliers), N. Thiriat (Paris), C. Turci (Saint-Genis-  
26 Laval), N. Vantard (Lyon), N. Vauvarin (Joigny), S. Vernardet (Annonay), D. Viard (Besancon), C.  
27 Vignand (Lyon), C. Villa (Vienne), P. Vonna (Epernay), S. Wacker (Strasbourg), N. Wereszczynski  
28 (Grasse), and L. Zerhouni (Paris).

29  
30  
31  
32  
33  
34  
35  
36  
37  
38  
39  
40  
41  
42  
43  
44  
45 We thank Kévin Mastrotillo, technical consultant of the Act-IP© observatory, for his contribution to the  
46 data extraction and data management.

#### 47 48 49 **Funding statement**

50 This research received no specific grant from any funding agency in the public, commercial, or not-for-  
51 profit sectors.

52  
53  
54 This study was supported by The French Society of Clinical Pharmacy, a nonprofit and independent  
55 foundation for clinical pharmacy research and development.

#### 56 57 58 **Statement on conflicts of interest**

59 The authors declare that they have no conflicts of interest.  
60

1  
2  
3 **Patient consent for publication**

4 Not required  
5

6  
7 **Ethical approval**

8 Ethical approval for the study was obtained on February 19, 2020 (CECIC Rhône-Alpes-Auvergne,  
9 Clermont-Ferrand, IRB 5891).  
10  
11  
12  
13  
14  
15  
16  
17  
18  
19  
20  
21  
22  
23  
24  
25  
26  
27  
28  
29  
30  
31  
32  
33  
34  
35  
36  
37  
38  
39  
40  
41  
42  
43  
44  
45  
46  
47  
48  
49  
50  
51  
52  
53  
54  
55  
56  
57  
58  
59  
60

For peer review only

1  
2  
3 **Summary table**  
4

5 Table 1. Characteristics of Act-IP© observatory PISREs and PIs between 2014 to 2018.  
6

7  
8 Table 2. Examples of PISREs and drug-by-drug related problems (N = 27,822).  
9  
10  
11  
12  
13  
14  
15  
16  
17  
18  
19  
20  
21  
22  
23  
24  
25  
26  
27  
28  
29  
30  
31  
32  
33  
34  
35  
36  
37  
38  
39  
40  
41  
42  
43  
44  
45  
46  
47  
48  
49  
50  
51  
52  
53  
54  
55  
56  
57  
58  
59  
60

For peer review only

### Summary Figures

Figure 1. Flowchart, PISRE selection in Act-IP© observatory (extraction on 11th February 2019)

Figure 2. Geographical location of French hospitals that entered data into the Act-IP © observatory between 2014 and 2018

For peer review only

Table 1. Characteristics of all Act-IP© observatory PISREs and PIs between 2014 to 2018.

| Characteristics                                   | PISRE        | PI total      | ratio |          |
|---------------------------------------------------|--------------|---------------|-------|----------|
|                                                   | (N = 27,058) | (N = 331,678) | %     | p-value  |
| Drug related problem                              |              |               |       |          |
| Supratherapeutic dosage                           | 7,436        | 72,912        | 10.2  |          |
| Non-conformity with guidelines/hospital formulary | 6,069        | 86,072        | 7.1   |          |
| Improper administration                           | 4,838        | 49,184        | 9.8   |          |
| Subtherapeutic dosage                             | 4,646        | 29,105        | 16.0  |          |
| Untreated indication                              | 2,366        | 30,138        | 7.9   |          |
| Drug without indication                           | 1,302        | 27,690        | 4.7   |          |
| Drug interaction                                  | 161          | 18,267        | 0.9   |          |
| Drug monitoring                                   | 111          | 10,303        | 1.1   |          |
| Adverse drug reaction                             | 65           | 5,854         | 1.1   |          |
| Failure to receive drug                           | 64           | 2,153         | 3.0   |          |
| Type of intervention                              |              |               |       |          |
| Dose adjustment                                   | 7,447        | 89,390        | 8.3   |          |
| Drug switch                                       | 6,649        | 85,033        | 7.8   |          |
| Drug discontinuation                              | 5,220        | 62,715        | 8.3   |          |
| Optimization of administration                    | 4,123        | 32,558        | 12.7  |          |
| Addition of new drug                              | 3,228        | 34,198        | 9.4   |          |
| Change of administration route                    | 213          | 6,978         | 3.1   |          |
| Drug monitoring                                   | 178          | 20,806        | 0.9   |          |
| Prescriber Acceptance                             |              |               |       |          |
| Interventions accepted                            | 21,356       | 227,223       | 9.4   | < 0.001* |

|                            |        |         |      |         |
|----------------------------|--------|---------|------|---------|
| Interventions not accepted | 3,068  | 51,957  | 5.9  |         |
| Not assessable             | 2,634  | 52,498  | 5.0  |         |
| Prescriber's status        |        |         |      |         |
| Senior                     | 15,152 | 180,863 | 8.4  | < 0.001 |
| Resident                   | 11,765 | 150,136 | 7.8  |         |
| Midwife**                  | 141    | 679     | 20.8 |         |
| Pharmacist's status        |        |         |      |         |
| Senior                     | 21,271 | 231,519 | 9.2  | < 0.001 |
| Resident                   | 4,640  | 86,728  | 5.4  |         |
| Not assessable**           | 1,147  | 13,431  | 8.5  |         |
| CPOE system status         |        |         |      |         |
| Not certified              | 21,385 | 226,878 | 9.4  | < 0.001 |
| Certified                  | 5,549  | 101,516 | 5.5  |         |
| Not assessable**           | 124    | 3,284   | 3.8  |         |
| Total                      | 27,058 | 331,678 | 8.2  |         |

*PI: pharmacist's intervention, PISRE: pharmacist's intervention identified as due to a system-related error, CPOE: computerized prescriber order entry*

*\*Not accepted and not assessable interventions have been regrouped for chi-square test; \*\*excluded from the chi-square analysis*

Table 2. Examples of PISRE and drug by drug-related problems (N = 27,822)

| Drug-related problem                          | Number of drugs involved – n (%) | Most frequent drug (generic name) (n)                                                                            | Examples                                                                                                          |
|-----------------------------------------------|----------------------------------|------------------------------------------------------------------------------------------------------------------|-------------------------------------------------------------------------------------------------------------------|
| Supratherapeutic dosage                       | 7,571 (27.2)                     | Paracetamol (1,043), tramadol (223), pantoprazole (212), enoxaparin (204)                                        | “Duplicate prescription: 1 in predefined protocol and 1 outside predefined protocol = 8 g of paracetamol per day” |
| Non-conformity to guidelines/contraindication | 6,212 (22.3)                     | Alfuzosin (515), dutasteride (493), silodosin (469), paracetamol (460), tamsulosin (373)                         | “prescription of dutasteride, which is not in the hospital drug formulary, with a risk of treatment omission”     |
| Improper administration                       | 4,972 (17.9)                     | Paracetamol (277), levothyroxine (130), pregabalin (130), methylprednisolone (124)                               | “selection of IV terbutaline for administration by aerosol”                                                       |
| Subtherapeutic dosage                         | 4,738 (17.0)                     | Enoxaparin (965), heparin (450), tinzaparin (186), paracetamol (140), macrogol (105),                            | “Enoxaparin 4000 UI/0.4 ml prescription: 1 IU instead of 1 syringe”                                               |
| Untreated indication                          | 2,441 (8.8)                      | acetylsalicylic acid (82), pregabalin (80), paracetamol (74), tinzaparin (69), bisoprolol (69), enoxaparin (68), | “prescription of pregabalin not renewed (hospital stay longer than the duration of the prescription)”             |

|                                                                                        |                         |             |                                                                                                                           |                                                                                                                                                                                 |
|----------------------------------------------------------------------------------------|-------------------------|-------------|---------------------------------------------------------------------------------------------------------------------------|---------------------------------------------------------------------------------------------------------------------------------------------------------------------------------|
| 1<br>2<br>3<br>4<br>5<br>6<br>7<br>8<br>9<br>10<br>11<br>12<br>13<br>14                | Drug without indication | 1,340 (4.8) | Pantoprazole (66), amoxicillin and beta-lactamase inhibitor (44), cholecalciferol (40), ceftriaxone (34), enoxaparin (30) | “duplicate prescription of pantoprazole per os and IV by two prescribers”                                                                                                       |
| 15<br>16<br>17<br>18<br>19<br>20<br>21<br>22<br>23<br>24<br>25<br>26<br>27<br>28<br>29 | Drug interaction        | 262 (0.9)   | Amiodarone (27), fluindione (9), levothyroxine (9)                                                                        | “cordarone and escitalopram combination contra-indicated: risk of “torsade de pointes” not modified during drug interaction alert with Clinical Decision Support System (CDSS)” |
| 30<br>31<br>32<br>33<br>34<br>35                                                       | Drug monitoring         | 124 (0.4)   | Fluindione (25), polystyrene sulfonate (8), paracetamol (4)                                                               |                                                                                                                                                                                 |
| 36<br>37<br>38<br>39<br>40<br>41<br>42<br>43<br>44                                     | Adverse drug reaction   | 70 (0.3)    | Polystyrene sulfonate (11), furosemide (6), atorvastatin (4), tramadol (3), macrogol (3)                                  | “increased risk of adverse reactions by the combination of atorvastatin and fenofibrate”                                                                                        |
| 45<br>46<br>47<br>48<br>49<br>50<br>51<br>52<br>53                                     | Failure to receive drug | 92 (0.3)    | Esomeprazole (3), cholecalciferol (3), acetylsalicylic acid (3), furosemide (3)                                           | “Prescription of furosemide not appearing on the nursing plan”                                                                                                                  |



## References

1. Lewis PJ, Dornan T, Taylor D, Tully MP, Wass V, Ashcroft DM. Prevalence, incidence and nature of prescribing errors in hospital inpatients: a systematic review. *Drug Saf.* 2009;32(5):379-89.
2. Ashcroft DM, Lewis PJ, Tully MP, Farragher TM, Taylor D, Wass V, et al. Prevalence, Nature, Severity and Risk Factors for Prescribing Errors in Hospital Inpatients: Prospective Study in 20 UK Hospitals. *Drug Saf.*38(9) (2015) 833-43.
3. Vélez-Díaz-Pallarés M, Álvarez Díaz AM, Gramage Caro T, Vicente Oliveros N, Delgado-Silveira E, Muñoz García M, Cruz-Jentoft AJ, Bermejo-Vicedo T. Technology-induced errors associated with computerized provider order entry software for older patients. *Int. J. Clin. Pharm.* 39(4) (2017) 729-742.
4. Radley DC, Wasserman MR, Olsho LE, Shoemaker SJ, Spranca MD, Bradshaw B. Reduction in medication errors in hospitals due to adoption of computerized provider order entry systems. *J. Am. Med. Inform. Assoc.* 20(3) (2013) 470-6.
5. Nuckols TK, Smith-Spangler C, Morton SC, Asch SM, Patel VM, Anderson LJ, et al. The effectiveness of computerized order entry at reducing preventable adverse drug events and medication errors in hospital settings: a systematic review and meta-analysis. *Syst. Rev.* 3 (56) (2014). <https://doi.org/10.1186/2046-4053-3-56>.
6. Koppel R, Metlay JP, Cohen A, Abaluck B, Localio AR, Kimmel SE, et al. Role of Computerized Physician Order Entry Systems in Facilitating Medication Errors. *JAMA.* 293(10) (2005) 1197-203.
7. Brown CL, Mulcaster HL, Triffitt KL, Sittig DF, Ash JS, Reygate K, et al. A systematic review of the types and causes of prescribing errors generated from using computerized provider order entry systems in primary and secondary care. *J. Am. Med. Inform. Assoc.* 24(2) (2017) 432-40.
8. Horsky J, Kuperman GJ, Patel VL. Comprehensive analysis of a medication dosing error related to CPOE. *J. Am. Med. Inform. Assoc.* 12(4) (2005) 377-82.
9. Prescrire Editorial Staff. Electronic prescribing: the risk of errors and adverse effects. *Prescrire Int.* 25(167) (2016) 24-7.
10. Vialle V, Tiphine T, Poirier Y, Raingeard E, Feldman D, Freville J-C. [To know, understand and combating medication errors related to computerized physician order entry]. *Ann. Pharm. Fr.* 69(3) (2011) 165-76.
11. Direction Générale de l'offre de Soins [Internet]. [2018 HIS Atlas. State of the art of hospital information systems][updated 2018 May 15; cited 2019Nov 9]. Available from:[https://solidarites-sante.gouv.fr/IMG/pdf/dgos\\_atlas\\_sih\\_2018.pdf](https://solidarites-sante.gouv.fr/IMG/pdf/dgos_atlas_sih_2018.pdf)
12. Westbrook JI, Reckmann M, Li L, Runciman WB, Burke R, Lo C, Baysari MT, Braithwaite J, Day RO. Effects of two commercial electronic prescribing systems on prescribing error rates in hospital in-patients: a before and after study. *PLoS Med.* 2012 Jan;9(1):e1001164.
13. Bouchand F, Thomas A, Zerhouni L, Dauphin A, Conort O. (Pharmaceutical interventions before and after computerization of the prescription in an internal medicine department] *Presse Médicale.* 2007 Mar 1;36(3, Part 1):410-8.

14. Hellot-Guersing M, Jarre C, Molina C, Leromain A-S, Derharoutunian C, Gadot A, et al. [Medication errors related to computerized physician order entry at the hospital: Record and analysis over a period of 4 years]. *Ann Pharm Fr.* 2016 Jan;74(1):61-70.
15. Westbrook JI, Baysari MT, Li L, Burke R, Richardson KL, Day RO. The safety of electronic prescribing: manifestations, mechanisms, and rates of system-related errors associated with two commercial systems in hospitals. *J Am Med Inform Assoc JAMIA.* 2013;20(6):1159-67.
16. Sittig DF, Ash JS, Zhang J, Osheroff JA, Shabot MM. Lessons from « Unexpected increased mortality after implementation of a commercially sold computerized physician order entry system ». *Pediatrics.* 2006;118(2):797-801.
17. Charpiat B, Bedouch P, Conort O, Rose FX, Juste M, Roubille R, Allenet B. Opportunities for medication errors and pharmacist's interventions in the context of computerized prescription order entry: a review of data published by French hospital pharmacists]. *Ann Pharm Fr.* 2012 Mar;70(2):62-74. doi: 10.1016/j.pharma.2012.02.002.
18. Ranji SR, Rennke S, Wachter RM. Computerised provider order entry combined with clinical decision support systems to improve medication safety: a narrative review. *BMJ Qual Saf.* 2014 Sep;23(9):773-80. doi: 10.1136/bmjqs-2013-002165.
19. Korb-Savoldelli V, Boussadi A, Durieux P, Sabatier B. Prevalence of computerized physician order entry systems-related medication prescription errors: A systematic review. *Int J Med Inform.* 2018 Mar;111:112-122. doi: 10.1016/j.ijmedinf.2017.12.022.
20. Allenet B, Bedouch P, Rose F-X, Escofier L, Roubille R, Charpiat B, et al. Validation of an instrument for the documentation of clinical pharmacists' interventions. *Pharm World Sci.* 2006 Aug;28(4):181-8.
21. Bedouch P, Charpiat B, Roubille R. The French Society of Clinical Pharmacy website for the documentation and analysis of pharmacist's interventions: purpose, instructions and perspectives. *J Pharm Clin.* 2007;26:40-4.
22. Haute Autorité de Santé[internet]. Logiciels d'Aide à la Prescription hospitaliers. [updated 2019 Oct 7; cited 2019 Nov 9]. Available from:[https://www.has-sante.fr/jcms/c\\_1751516/fr/logiciels-d-aide-a-la-prescription-hospitaliers](https://www.has-sante.fr/jcms/c_1751516/fr/logiciels-d-aide-a-la-prescription-hospitaliers)
23. Marcilly R, Ammenwerth E, Vasseur F, Roehrer E, Beuscart-Zéphir MC. Usability flaws of medication-related alerting functions: A systematic qualitative review. *J Biomed Inform.* 2015 Jun;55:260-71. doi: 10.1016/j.jbi.2015.03.006.
24. Haute Autorité de Santé[internet]. Référentiel de certification des logiciels hospitaliers par essai de type. [updated 2012Jun5; cited 2019 Oct6]. Available from:[https://www.has-sante.fr/upload/docs/application/pdf/2012-06/referentiel\\_certification\\_lap\\_hospitalier\\_juin12.pdf](https://www.has-sante.fr/upload/docs/application/pdf/2012-06/referentiel_certification_lap_hospitalier_juin12.pdf)
25. Prescrire rédaction. Prescription informatisée : un outil encore expérimental, trop peu régulé. *Rev Prescrire.* 2015;35(386):938-9.
26. Nanji KC, Rothschild JM, Salzberg C, Keohane CA, Zigmont K, Devita J, et al. Errors associated with outpatient computerized prescribing systems. *J Am Med Inform Assoc JAMIA.* 2011 Dec;18(6):767-73.

- 1
- 2
- 3 27. Holmgren AJ, Adler-Milstein J, McCullough J. Are all certified EHRs created equal?  
4 Assessing the relationship between EHR vendor and hospital meaningful use  
5 performance. *J Am Med Inform Assoc*. 2018 Jun 1;25(6):654-660.  
6
- 7 28. Ratwani RM, Fairbanks RJ, Hettinger AZ, Benda NC. Electronic health record usability:  
8 analysis of the user-centered design processes of eleven electronic health record vendors.  
9 *J Am Med Inform Assoc*. 2015 Nov;22(6):1179-82  
10
- 11 29. Jaensch SL, Baysari MT, Day RO, Westbrook JI. Junior doctors' prescribing work after-  
12 hours and the impact of computerized decision support. *Int J Med Inform*. 2013  
13 Oct;10(82):980-6.  
14
- 15 30. Nerich V., Limas S., Demarchi M., Borg C, Rohrlich PS, Deconinck E. Computerized  
16 physician order entry of injectable antineoplastic drugs: an epidemiologic study of  
17 prescribing medication errors. *Int J Med Inform*. 2010 Oct; 79(10) :699-706.  
18
- 19 31. Tolley CL. (2018) An investigation of healthcare professionals' experiences of training  
20 and using electronic prescribing systems: four literature reviews and two qualitative  
21 studies undertaken in the UK hospital context, Durham theses, Durham University.  
22 Available at Durham E-Theses Online: <http://etheses.dur.ac.uk/12845/>  
23
- 24 32. Tully M, Buchan I. Prescribing errors during hospital inpatient care: factors influencing  
25 identification by pharmacists. *Pharm World Sci*. 2009;31(6):682–8.  
26
- 27 33. Charpiat B, Derfoufi S, Larger M, Janoly-Dumenil A, Mouchoux C, Allenet B, et al.  
28 [Identification of knowledge deficits of pharmacy students at the beginning of the fifth  
29 year of pharmacy practice experience: Proposals to change the content of academic  
30 programs]. *Ann Pharm Fr*. 2016 Sept;74(5):404-12  
31
- 32 34. Pontefract SK, Wilson K. Using electronic patient records: defining learning outcomes  
33 for undergraduate education. *BMC Med Educ*. 2019 Jan;19(1):30.  
34
- 35 35. Accreditation Council of Pharmacy Education[internet]. Accreditation standards and key  
36 elements for the professional program in pharmacy leading to the doctor of pharmacy  
37 degree. Standards 2016. [cited 2019 Oct 13]. Available from: [https://www.acpe-  
38  
39  
40  
41  
42  
43  
44  
45  
46  
47  
48  
49  
50  
51  
52  
53  
54  
55  
56  
57  
58  
59  
60](https://www.acpe-accredit.org/pdf/Standards2016FINAL.pdf)
36. Beex-Oosterhuis MM, de Vogel EM, van der Sijs H, Dieleman HG, van den Bemt PM.  
Detection and correct handling of prescribing errors in Dutch hospital pharmacies using  
test patients. *Int J Clin Pharm* 2013;35:1188-1202.
37. Schiff, G.D., Amato, M.G., Eguale, T., et al., Computerised physician order entry related  
medication errors: analysis of reported errors and vulnerability testing of current  
systems. *BMJ Qual Saf*, 2015. 24(4): p. 264-71.
38. Condren, M., Honey, B.L., Carter, S.M., et al., Influence of a systems-based approach to  
prescribing errors in a pediatric resident clinic. *Acad Pediatr*, 2014. 14(5): p. 485-90.

Figure 1. Flowchart, PISRE selection in Act-IP© observatory (extraction on 11<sup>th</sup> February 2019)

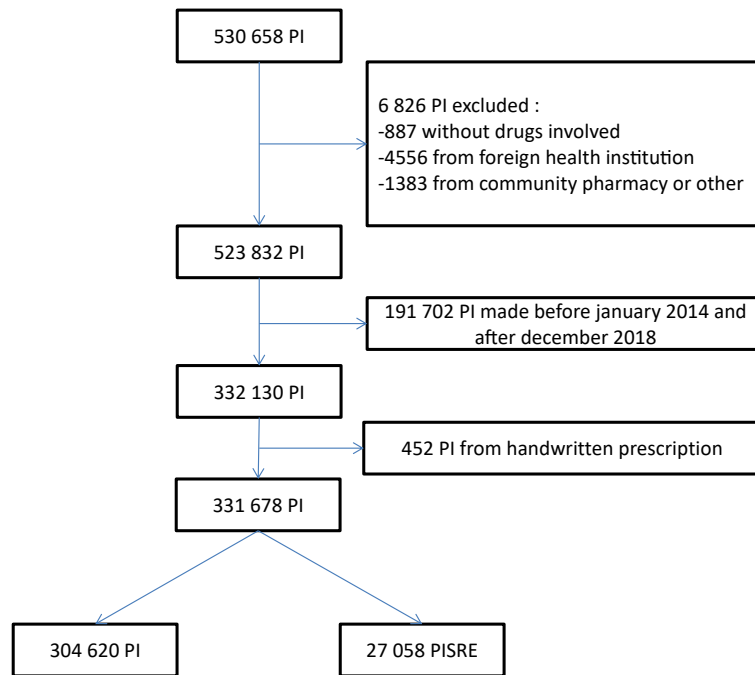

view only

1  
2  
3  
4  
5  
6  
7  
8  
9  
10  
11  
12  
13  
14  
15  
16  
17  
18  
19  
20  
21  
22  
23  
24  
25  
26  
27  
28  
29  
30  
31  
32  
33  
34  
35  
36  
37  
38  
39  
40  
41  
42  
43  
44  
45  
46  
47  
48  
49  
50  
51  
52  
53  
54  
55  
56  
57  
58  
59  
60

Figure 2. Geographical location of French hospitals that entered data into the Act-IP © observatory between 2014 and 2018

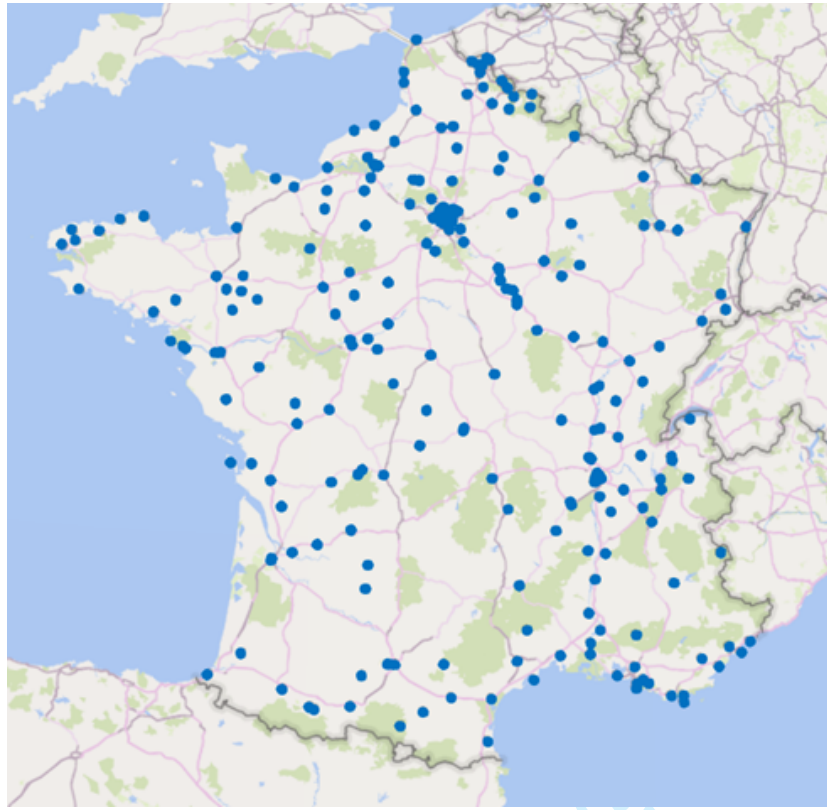

Review only

## Appendix 1. The Pharmacist intervention form

**PHARMACIST INTERVENTION FORM**📅 **DATE:** / /📁 **INTERVENTION N°:**🏢 **CENTER N°:****PATIENT:**

Last name:

First name:

Age:        years / Weight:    Kg

Sex:  M         F**Hospital ward:**

- Psychiatry  
 Acute care  
 Long term care  
 Rehabilitation ward

**1- DRUG RELATED PROBLEM (1 choice):**

- 1  Non conformity to guidelines or contra-indication  
2  Untreated indication  
3  Subtherapeutic dosage  
4  Supratherapeutic dosage  
5  Drug without indication  
6  Drug interaction  
     To be taken into account  
     Use with caution  
     Combination to be avoided  
     Combination contra-indicated  
     Documented but not in VIDAL®  
7  Adverse drug reaction  
8  Improper administration  
9  Failure to receive drug  
10  Drug monitoring

**2- INTERVENTION (1 choice):**

- 1  Addition of a new drug  
2  Drug discontinuation  
3  Drug switch  
4  Change of administration route  
5  Drug monitoring  
6  Administration modalities optimisation  
7  Dose adjustment

**DRUG NAME (INN):****3- DRUG CLASSIFICATION (ATC):**

- A Alimentary tract & metabolism  
 B Blood & blood forming organs  
 C Cardiovascular system  
 D Dermatological  
 G Genito urinary system & sex hormones  
 H Systemic hormonal preparations  
 J Anti-infective for systemic use  
 L Anti-neoplastic & immunomodulating agents  
 M Musculo-skeletal system  
 N Nervous system  
 P Antiparasitic products  
 R Respiratory system  
 S Sensory organs  
 V Various

**4- INTERVENTION FOLLOW-UP:**

- Accepted  
 Non accepted  
 Non assessable

**DETAILS** ⇒ If necessary, give details on any aspects of the detected DRP and describe the intervention, precisely**Context****Problem****Intervention**

# BMJ Open

## Characteristics of Pharmacist's interventions triggered by prescribing errors related to computerized physician order entry in French hospitals: a cross-sectional observational study

|                                 |                                                                                                                                                                                                                                                                                                                                                                                                                                                                                                                                              |
|---------------------------------|----------------------------------------------------------------------------------------------------------------------------------------------------------------------------------------------------------------------------------------------------------------------------------------------------------------------------------------------------------------------------------------------------------------------------------------------------------------------------------------------------------------------------------------------|
| Journal:                        | <i>BMJ Open</i>                                                                                                                                                                                                                                                                                                                                                                                                                                                                                                                              |
| Manuscript ID                   | bmjopen-2020-045778.R1                                                                                                                                                                                                                                                                                                                                                                                                                                                                                                                       |
| Article Type:                   | Original research                                                                                                                                                                                                                                                                                                                                                                                                                                                                                                                            |
| Date Submitted by the Author:   | 26-Jul-2021                                                                                                                                                                                                                                                                                                                                                                                                                                                                                                                                  |
| Complete List of Authors:       | Videau, Manon; TIMC-IMAG, CNRS-UMR 5525/ThEMAS/Université Grenoble Alpes; CHU Grenoble Alpes, Pharmacie Charpiat, Bruno; TIMC-IMAG, CNRS-UMR 5525/ThEMAS/Université Grenoble Alpes; Hopital de la Croix-Rousse, Pharmacie Vermorel, Céline; TIMC-IMAG, CNRS-UMR 5525/ThEMAS/Université Grenoble Alpes<br>Bosson, J.L; TIMC-IMAG, CNRS-UMR 5525/ThEMAS/Université Grenoble Alpes<br>Conort, Ornella; Hopital Cochin, Pharmacie<br>Bedouch, Pierrick; TIMC-IMAG, CNRS-UMR 5525/ThEMAS/Université Grenoble Alpes; CHU Grenoble Alpes, Pharmacie |
| <b>Primary Subject Heading</b>: | Health informatics                                                                                                                                                                                                                                                                                                                                                                                                                                                                                                                           |
| Secondary Subject Heading:      | Health informatics, Health services research, Pharmacology and therapeutics                                                                                                                                                                                                                                                                                                                                                                                                                                                                  |
| Keywords:                       | Health & safety < HEALTH SERVICES ADMINISTRATION & MANAGEMENT, Adverse events < THERAPEUTICS, Health informatics < BIOTECHNOLOGY & BIOINFORMATICS                                                                                                                                                                                                                                                                                                                                                                                            |
|                                 |                                                                                                                                                                                                                                                                                                                                                                                                                                                                                                                                              |

SCHOLARONE™  
Manuscripts





I, the Submitting Author has the right to grant and does grant on behalf of all authors of the Work (as defined in the below author licence), an exclusive licence and/or a non-exclusive licence for contributions from authors who are: i) UK Crown employees; ii) where BMJ has agreed a CC-BY licence shall apply, and/or iii) in accordance with the terms applicable for US Federal Government officers or employees acting as part of their official duties; on a worldwide, perpetual, irrevocable, royalty-free basis to BMJ Publishing Group Ltd ("BMJ") its licensees and where the relevant Journal is co-owned by BMJ to the co-owners of the Journal, to publish the Work in this journal and any other BMJ products and to exploit all rights, as set out in our [licence](#).

The Submitting Author accepts and understands that any supply made under these terms is made by BMJ to the Submitting Author unless you are acting as an employee on behalf of your employer or a postgraduate student of an affiliated institution which is paying any applicable article publishing charge ("APC") for Open Access articles. Where the Submitting Author wishes to make the Work available on an Open Access basis (and intends to pay the relevant APC), the terms of reuse of such Open Access shall be governed by a Creative Commons licence – details of these licences and which [Creative Commons](#) licence will apply to this Work are set out in our licence referred to above.

Other than as permitted in any relevant BMJ Author's Self Archiving Policies, I confirm this Work has not been accepted for publication elsewhere, is not being considered for publication elsewhere and does not duplicate material already published. I confirm all authors consent to publication of this Work and authorise the granting of this licence.



1  
2  
3 **Characteristics of Pharmacist’s interventions triggered by prescribing errors related to**  
4 **computerized physician order entry in French hospitals: a cross-sectional observational study**  
5

6 Manon Videau<sup>1,2</sup>, Bruno Charpiat<sup>1,3</sup>, Céline Vermorel<sup>1</sup>, Jean-Luc Bosson<sup>1</sup>, Ornella Conort<sup>4</sup>, and Pierrick  
7 Bedouch<sup>1,2</sup> on behalf of the SFPC VIP– Act-IP© group<sup>5</sup>  
8

9 <sup>1</sup>Université Grenoble Alpes, CNRS/TIMC-IMAG UMR5525/ThEMAS, F-38041, Grenoble, France

10 <sup>2</sup>Pharmacy Department, Grenoble Alpes University Hospital, 38043, Grenoble, France

11 <sup>3</sup>Pharmacy Department, Hôpital Croix Rouse, Hospices civils de Lyon, 69004, Lyon, France

12 <sup>4</sup>Pharmacy Department, Hôpital Cochin, Assistance Publique Hôpitaux de Paris, 75879 Paris, France

13 <sup>5</sup>Working group “Valorization of Pharmaceutical Interventions/ Valorisation des Interventions  
14 Pharmaceutiques – Act-IP©” of the French Society for Clinical Pharmacy (see composition and  
15 members in acknowledgments)  
16

17  
18  
19  
20  
21  
22 **Corresponding author:**

23 Manon Videau

24 Université Grenoble Alpes

25 CNRS/TIMC-IMAG/UMR5525/ThEMAS, F-38041,

26 Grenoble, France

27 Email: videau.manon@gmail.com  
28  
29  
30  
31  
32

33 **Keywords:** drug related problem, prescribing error, pharmacist intervention, computerized physician  
34 order entry (CPOE)  
35  
36  
37  
38

39 Abstract: 305/300 words

40 Main text: 2785/4000 words  
41  
42  
43  
44  
45  
46  
47  
48  
49  
50  
51  
52  
53  
54  
55  
56  
57  
58  
59  
60

## Abstract

### Objectives

Computerized physician order entry (CPOE) systems facilitate the review of medication orders by pharmacists. Reports have emerged that show conception flaws or the misuse of CPOE systems generate prescribing errors. We aimed to characterize pharmacist interventions (PIs) triggered by prescribing errors identified as system-related errors (SREs) in French hospitals.

### Design

This was a cross-sectional observational study based on PIs prospectively documented in the Act-IP© observatory database from January 2014 to December 2018.

### Setting

PISREs from 319 French computerized healthcare facilities were analyzed.

### Participants

Among the 319 French hospitals, 232 (72.7%) performed SRE interventions, involving 652 (51%) pharmacists.

### Results

Among the 331,678 PIs recorded, 27,058 were qualified as due to SREs (8.2%). The main drug-related problems associated with PISREs were suprathereapeutic (27.5%) and subtherapeutic dosage (17.2%), non-conformity with guidelines/contraindications (22.4%), and improper administration (17.9%). The PI prescriber acceptance rate was 78.9% for SREs versus 67.6% for other types of errors. The PISRE ratio was estimated relative to the total number of PIs. Concerning the certification status of CPOE systems, the PISRE ratio was 9.4% for non-certified systems versus 5.5% for certified systems ( $p$ -value $<0.001$ ). The PISRE ratio for senior pharmacists was 9.2% and that for pharmacy residents 5.4% ( $p$ -value $<0.001$ ). Concerning prescriptions made by graduate prescribers and those made by residents, the PISRE ratio was 8.4 % and 7.8%, respectively ( $p$ -value $<0.001$ ).

### Conclusion

1  
2  
3 Computer-related prescribing errors are common. The PI acceptance rate by prescribers was higher than  
4 that observed for PIs that were not CPOE related. This suggests that physicians consider the potential  
5 clinical consequences of SREs for patients to be more frequently serious than interventions unrelated to  
6 CPOE. CPOE medication review requires continual pharmacist diligence to catch these errors. The  
7 significantly lower PISRE ratio for certified software should prompt patient safety agencies to undertake  
8 studies to identify the safest software and discard software that is potentially dangerous.  
9  
10  
11  
12  
13  
14  
15  
16  
17  
18  
19  
20  
21  
22  
23  
24  
25  
26  
27  
28  
29  
30  
31  
32  
33  
34  
35  
36  
37  
38  
39  
40  
41  
42  
43  
44  
45  
46  
47  
48  
49  
50  
51  
52  
53  
54  
55  
56  
57  
58  
59  
60

For peer review only

## Article Summary

### Strengths and limitations of this study

- This study provides an overview of prescribing issues related to the use of CPOE systems at the national level.
- Beyond this large register of prescribing problems related to CPOE use, this is the first study to evaluate pharmacist interventions in daily practice for such a large sample of interventions, pharmacists, and hospitals.
- This study focuses on declarative data based on interventions performed by hospital pharmacists.
- These pharmacist interventions highlight prescription problems, but they are not exhaustive.

## 1. Introduction

Every day, numerous hospitalized patients are subject to drug-related problems (DRPs), resulting in suboptimal therapy, suffering, and decreased quality of life, as well as high healthcare costs for society [1, 2]. Computerized physician order entry (CPOE) systems, along with clinical decision support systems, improve the safety, quality, and value of patient care [3]. According to a meta-analysis, CPOE systems have reduced hospital medication errors by approximately 12.5% IC95% [10.6-14.4%] [4]. However, CPOE systems also have the potential to introduce or contribute to errors. Indeed, new mechanisms that lead to prescription errors have been identified with CPOE: wrong patient selection, failure to report drug allergies, incorrect entry or wrong selection of medication, dose, route, or time of administration, and confusing free-text comments [5-10].

In France, as in other countries, various incentives and requirements have been put in place to encourage computerized drug prescribing, such as France's "Digital Hospital" program [11]. Since the 2000s, prescribing errors associated with the use of CPOE have been slowly coming to light as healthcare has become increasingly computerized [9]. Compared to handwritten prescriptions, the analysis of electronic prescriptions requires a particular effort on the part of pharmacists and other health professionals to detect errors [9]. System-related errors (SREs) are defined as those in which the electronic prescribing system functionality or design contributed to the error, with little possibility that another cause, such as lack of knowledge, produced the error. For example, an order for an inappropriate drug located on a drop-down menu next to a likely drug selection is a system-related error [12].

A pharmacist intervention (PI) due to a SRE is defined as any PI resulting from the identification of a prescribing error by a pharmacist that would probably not have occurred in the context of a handwritten prescription and of which at least one cause is related to the use of a computer (software system configuration issue, software functionality issue, or software misuse) [13-16].

Most studies concerning PIs triggered by system-related prescribing errors were conducted within a single hospital [17-19]. As a result, it is not possible to assess the extent of prescribing errors related to electronic systems or draw conclusions about subsequent PIs at a national level.

1  
2  
3 In 2003, the French Society of Clinical Pharmacy (SFPC) developed and validated a tool for classifying  
4 and documenting clinical PIs [20]. This tool allows the reporting of DRPs and PIs performed during the  
5 daily review of medication orders [21]. In 2006, a website, Act-IP©, was created with the objectives to  
6  
7 (a) create a documentation system that is freely accessible to any pharmacist, through the French Society  
8 of Clinical Pharmacy Web site (<http://www.actip.sfpc.eu/actip/index/ficheip/>) and (b) pool the data  
9 recorded by all pharmacists to conduct epidemiological studies concerning DRPs detected by  
10 pharmacists [22]. The data recording is on a voluntary basis. The pooling of PIs constitutes an  
11 observatory of clinical pharmacy practices, called the “Act-IP© Observatory”.

12  
13  
14  
15  
16  
17  
18  
19  
20  
21 The aim of this study was to characterize PIs triggered due to SREs in French hospitals between 2014  
22 and 2018. Our secondary objective was to determine the physician acceptance rate and its frequency  
23 according to the certification status (certified versus non-certified) of the CPOE systems.

## 28 **2. Methods**

### 29 *2.1. Study design*

30  
31  
32 This was a cross-sectional observational study using PIs prospectively documented in the Act-IP©  
33 observatory over a five-year period from January 1, 2014 to December 31, 2018. The main outcome was  
34 a PI due to a SRE (PISRE) reported by French hospital pharmacists on the Act-IP© observatory. Ethical  
35 approval for the study was obtained on February 19, 2020 (CECIC Rhône-Alpes-Auvergne, Clermont-  
36 Ferrand, IRB 5891).

### 43 *2.2. Data sources*

44  
45  
46 The data comes from the Act-IP© Observatory. Based on the SFPC criteria, using the report form  
47 developed and validated for routine documentation of the PIs, Act-IP© users completed the online report  
48 form notifying the date, type of DRP, PI, type of drug involved (according to the ATC (Anatomical  
49 Therapeutic Chemical) classification), acceptance of the intervention by the prescriber, and free-text  
50 details of the context. Ten categories were determined for DRPs and seven for PIs (Appendix 1). A PI  
51 was considered to be “accepted” if the physician took it into account and modified the prescription as  
52 suggested by the pharmacist or “refused” if the prescription remained unchanged, including cases of  
53  
54  
55  
56  
57  
58  
59  
60

1  
2  
3 expressed refusal by the prescriber. If acceptance of the intervention was impossible to ascertain (i.e.  
4 discharged patients or those transferred to another ward before acceptance), the PI was noted as “not  
5 assessable”. The pharmacist’s academic background, hospital characteristics, and software used were  
6 documented online by the pharmacist when he/she registered onto the Act-IP© website. To be registered  
7 onto the Act-IP© website, pharmacists had prior to accept terms and conditions and allowed the use of  
8 their data for analysis. Since July 2013, pharmacists have been able to indicate whether the DRP was  
9 “related to the electronic system” or not for each registered PI. For the purpose of this study, DRPs  
10 identified as “related to the electronic system” were considered to be PISREs.

11  
12 French law made the certification of CPOE systems mandatory on December 29, 2011. However, two  
13 decrees abolished this obligation in 2017. Certification is now based on the sole initiative of the software  
14 developer. Forty-eight hospital CPOE software packages are currently certified by the agency for patient  
15 safety [Haute Autorité de Santé (HAS)] [23]. For our analysis, PIRSEs were classified according to the  
16 HAS status of the CPOE system (certified versus not certified).

### 17 18 19 20 21 22 23 24 25 26 27 28 29 30 31 32 33 34 35 36 37 38 39 40 41 42 43 44 45 46 47 48 49 50 51 52 53 54 55 56 57 58 59 60

### 2.3. Analysis

The PISRE ratio was estimated relative to the total number of PIs. Proportions were compared using the  
chi-square test. PISREs coded as “refused” or “not assessable” were combined and compared to the  
accepted PISREs. Probability values < 0.001 were considered to be statistically significant. Statistical  
analyses were performed using Stata 13 (Stata Corporation, College Station, Texas, USA). Several  
qualitative examples are given to illustrate PISREs.

## 4. Results

From January 2014 to December 2018, 331,678 PIs were entered into the Act-IP© observatory. Among  
them, 27,058 (8.2%) were indicated to be system-related prescribing errors (Figure 1).

Over the study period, 1,219 pharmacists from 319 hospitals recorded PIs in the Act-IP© observatory  
database. The geographical location of the hospitals involved is shown in Figure 2. Among them, 232  
(72.7%), involving 652 (51%) pharmacists, performed SRE interventions. Among the 319 hospitals, 87

(27.3%) did not qualify any PIs as being due to a SRE. PIs come from 82 software involving 19 certified systems.

The characteristics of the PISREs are summarized in Table 1. The most commonly identified type of DRP was “supratherapeutic dosage”, followed by “non-conformity with guidelines/contraindications” and “improper administration”. Among the 27,058 PISREs, 78.9% (n = 21,356) were accepted. The PISRE ratio was 9.4% for non-certified systems versus 5.5% for certified systems (p-value < 0.001). Appendix 2 presents examples of drug-related problems classified as being triggered by prescribing errors due to the CPOE system. For example: Prescription errors can be the same whether they are handwritten prescriptions or computer-assisted prescriptions. Indeed, the combination of amiodarone and escitalopram can appear on handwritten prescription because of prescriber’s lack of knowledge. With CPOE, Clinical Decision Support System (CDSS) tool can alert on drug-drug interaction. However, high frequency of alerts and dozens of daily interruptions for clinicians are responsible of "alert fatigue" and practitioners override alerts [24]. We can also find duplicate orders, meaning the same drug is prescribed twice. With predefined order set, it is common to have 8 grams of paracetamol per day prescribed. Duplication errors are partially explained by the fact that many screens are required to view patient medications, making intrinsically difficult to spot duplicates [25].

## 5. Discussion

This study provides an overview of prescription problems related to CPOE systems used in French hospitals. It provides insights into the main situations and medications involved in computer-related prescribing problems detected by pharmacists by providing a broad description of PIs performed during the daily review of routine medication orders. Thus one strength of this study is that it is based on a large number of hospitals scattered throughout France, as no prior study of such extent evaluating PIs in daily practice has been published.

### 5.1. PISRE rate

Our PISRE rate (8.2%) is within the range reported by Korb-Savoldelli et al. [19]. They analyzed peer-reviewed studies (n = 14) that quantitatively reported medication-prescription errors related to CPOE.



1  
2  
3 The prevalence of CPOE system-related medication errors relative to all prescription medication errors  
4 ranged from 6.1 to 77.7% (median = 26.1% [IQR:17.6–42,1]) and was less than 6.3% relative to the  
5 number of prescriptions reviewed. Ours is the first large-scale descriptive study using an observatory  
6 hospital pharmacy practice database to study computer-related prescribing errors.  
7  
8  
9  
10

### 11 12 *5.2. DRPs induced by CPOE*

13  
14 The main category of DRPs identified as PISREs were suprathereapeutic (27.5%, 7,436) and  
15 subtherapeutic dosage (17.2%, 4,646), non-conformity to guidelines/hospitals' drug formularies (22.4%,  
16 6,069) (i.e. medication selection non-compliant with the hospital drug formulary), and improper  
17 administration (17.9%, 4,838) (i.e. incorrect or no formulation, wrong timing). According to Korb-  
18 Savoldelli et al., all studies reported “wrong dose” and “wrong drug” errors [19], with the “wrong dose”  
19 error being that most frequently reported (from 7 to 67.4%, median = 31.5% [IQR:20.5–44.5]). Many of  
20 the prescription errors due to CPOE systems can have serious consequences for patients, depending on  
21 the clinical circumstances. Although some of are unlikely to occur (e.g. IV ketoprofen 150 ampoules/day  
22 instead of 150 mg/d), they nevertheless illustrate flaws in certain CPOE systems [26]. However, our  
23 data do not allow the discrimination between software errors, connection problems, and human error.  
24  
25  
26  
27  
28  
29  
30  
31  
32  
33  
34  
35

### 36 *5.3. CPOE systems*

37  
38 The proportion of PIs triggered by software-related prescription errors was higher for non-certified  
39 (9.4%) than certified software (5.5%). In France, certification tests produced by the HAS are intended  
40 to technically assess the functionality of the software in various situations, as the CPOE evaluation  
41 methodology simulates various clinical scenarios [27]. French regulations do not require CPOE  
42 developers to carry out usability studies before the systems are marketed. Nevertheless, despite the  
43 limitations of this type of certification criteria, which have already been highlighted [28], our results  
44 show that prescribing with CPOE-certified systems results in fewer prescription errors than prescribing  
45 with non-certified software. These results are consistent with those of other studies, i.e. all software is  
46 not equal and some is safer than others [29-31].  
47  
48  
49  
50  
51  
52  
53  
54  
55  
56  
57

### 58 *5.4. Prescribers*

1  
2  
3 The PISRE ratio was higher for prescriptions made by graduate prescribers (8.4%) than medical  
4 residents (7.8%) (p-value < 0.001). This finding is, at first glance, counterintuitive, as one would expect  
5 that a prescriber who has been practicing for several years in the same health facility would make fewer  
6 CPOE-related prescription errors with the software than a resident who has only been using the software  
7 for a few months. Observational studies show that medical residents make most prescriptions and  
8 transcribe them to the software prescription instructions of senior prescribers during the medical  
9 examination [32]. It is thus possible that, in some hospitals, senior physicians are only occasional users  
10 of the prescription software. According to Nerich et al., the occasional use of software (< 1 prescription  
11 per day) is a risk factor for prescription error (OR = 3.85, 95% CI [2.08-7.14]) [33]. Tolley described  
12 how a junior doctor remarked that there was no one he could ask for help with using the ePrescribing  
13 system, as he was “the most experienced person on this floor with regards to the ePrescribing system”.  
14 She also described how one consultant admitted she had not “learnt how to prescribe properly” because  
15 she did not “use the system often enough and regularly enough to know the quirks and tweaks”. This  
16 consultant relied on her junior staff to prescribe on the system [34].

### 33 5.5. Act-IP© Pharmacist' users

34  
35 The PISRE ratio for senior pharmacists (9.2%) was higher than that of pharmacy residents (5.4%). This  
36 is consistent with the results of a study performed in a UK teaching hospital showing that the likelihood  
37 of senior pharmacists identifying errors was greater than that of junior pharmacists [35] and in  
38 accordance with our expectations. A study concerning French pharmacy students showed that they trust  
39 the contribution of computerization to healthcare without critical analysis. This results in overconfidence  
40 in the computer tool, perceived to be reliable, and makes users less willing to search for the errors  
41 produced by this tool [36]. They are therefore not aware that the review of computerized prescription  
42 orders requires additional effort to identify prescription errors. This is the consequence of the lack of  
43 teaching/training about this subject in French pharmacy schools. This situation contrasts strikingly with  
44 the content of the curricula taught in the United Kingdom and USA, for example [37,38].

### 57 5.6. Prescriber Acceptance rate

1  
2  
3 The rate of acceptance of PISREs by prescribers was 78.9% versus 67.6% for other PIs. This suggests  
4 that prescribers recognize the relevance of such interventions due to the potential clinical consequences  
5 of such prescription errors. This rate varies from 65.9 to 92% in studies of drug errors induced by  
6 computerized prescription [10, 14], suggesting that physicians consider the potential clinical  
7 consequences of SRE to patients to be more frequently serious than interventions unrelated to CPOE. In  
8 light of our findings, a CPOE-related prescription error is a factor that favors acceptance of the  
9 PI. These points warrant further studies.  
10  
11  
12  
13  
14  
15  
16  
17

### 18 *5.7. Limits*

19  
20 Our study had several limitations. First, it focused on declarative data based on interventions performed  
21 by hospital pharmacists. These data are prospectively enter by pharmacists. There for, these PIs highlight  
22 prescription problems, but are not exhaustive. However, as illustrated by publications related to other  
23 databases on information technology incidents, despite their limitations, voluntary reports are useful to  
24 examine the nature of information technology events [39,40]. And the large sample size probably  
25 provides a relatively precise vision of the problem at the national level. Second, several pharmacists  
26 analyzing the same drug prescriptions may not all track down the same problems. For example, the mean  
27 percentage of detected prescribing errors was 59% in a study involving 57 hospital pharmacies, with a  
28 broad range of 7 to 88% between pharmacies [41]. In the absence of specific studies to determine the  
29 performance of pharmacists in detecting prescription errors induced by CPOE-system flaws and misuse,  
30 we are reduced to simply assuming that such variation may be observed. In addition, there are various  
31 definitions of PISREs in the literature [13-16]. This suggests that there is a certain level of subjectivity  
32 when a pharmacist characterizes a PI as being related to a computer-generated prescription. Among  
33 hospitals that entered the PIs on Act-IP©, 87 never qualified a PI as being a SRE. There are two possible  
34 explanations for this observation. The first, and relatively unlikely, is that the software is near perfect  
35 and that there was no misuse by prescribers. For example, the absence of PISREs for these hospitals  
36 could result from the absence of computer-related errors due to the use of high-performance software  
37 and/or appropriately trained prescribers. The second possibility is that pharmacists do not establish a  
38 link between certain prescription errors and misuse of the prescription software and/or its design flaws.  
39  
40  
41  
42  
43  
44  
45  
46  
47  
48  
49  
50  
51  
52  
53  
54  
55  
56  
57  
58  
59  
60

1  
2  
3 Conversely, a high rate of PISREs for a given hospital may result from software conception flaws and/or  
4 misuse of the software by prescribers and pharmacists who are very aware of the role of CPOE-systems  
5 in generating prescription errors. Regardless of the considered scenario, it is important to remember that  
6 differences in PISRE rates may also be due to the quality of the training provided. Studies have shown  
7 that insufficient training on an ePrescribing system can contribute to errors [42,43]. Tolley illustrated  
8 how pharmacists did not receive any formal training about the system after starting at a hospital trust  
9 and observed that no formal training was offered when pharmacists changed roles. It has been shown  
10 that training plays a role in the users' experience but there is a lack of published research in this area  
11 [34]. Thus, further research is warranted to lift the veil on these unknowns.  
12  
13  
14  
15  
16  
17  
18  
19  
20  
21  
22

23 Our results highlight that prescribing problems related to computer software are common in France.  
24 This is a concern that affects most (if not all) CPOE systems currently being used and therefore all  
25 hospitals, to varying degrees. Identifying the most dangerous software appears to be a priority to  
26 improve the quality and safety of patient care.  
27  
28  
29  
30  
31

## 32 **6. Conclusion**

33 Computer-related prescribing errors are common, with wrong dose being the most frequent type of error.  
34 Such errors concern all drug classes and have potentially serious adverse clinical consequences if they  
35 are not intercepted by pharmacists when performing their daily medication review. The message appears  
36 to be well received by prescribers who agree to change their prescription more frequently than for PIs  
37 not related to CPOE use. CPOE medication review requires additional pharmacist diligence to catch  
38 such errors. As the PISRE ratio is significantly lower for certified software, patient safety agencies  
39 should undertake studies to identify the safest software so as to discard software that is potentially  
40 dangerous.  
41  
42  
43  
44  
45  
46  
47  
48  
49  
50  
51  
52  
53  
54  
55  
56  
57  
58  
59  
60

### Author contributions

Manon Videau and Bruno Charpiat designed the study, performed the statistical analyses, interpreted the results, and wrote the first version of the manuscript. Céline Vermorel contributed to the design of the study, performed the statistical analyses, and revised the manuscript. Jean-Luc Bosson contributed to the design of the study and revised the manuscript. Ornella Conort contributed substantially to the interpretation of the data and contributed to the revision of the manuscript. Pierrick Bedouch designed the study, performed the statistical analyses, interpreted the results, and revised the manuscript.

### Acknowledgements

The authors would like to thank the team of THEMAS and VIP working group for assistance in this project. We thank the clinical pharmacists of the SFPC Act-IP© group who participated in the data collection.

Members of the working group “Valorization of Pharmaceutical Interventions/ Valorisation des Interventions Pharmaceutiques – Act-IP©” of the French Society for Clinical Pharmacy: Pierrick Bedouch (Grenoble), Magalie Bourdelin (Villefranche-sur-Saone), Bruno Charpiat (Lyon), Ornella Conort (Paris), Julien Gravoulet (Leyr), Audrey Janoly-Dumenil (Lyon), Michel Juste (Epernay), and Céline Mongaret (Reims).

Clinical pharmacists of the SFPC Act-IP© group who participated in the data collection: S. Abkhtaoui-Couriat (Corbie), B. Allard-Latour (Saint-Genis-Laval), C. Andrieu (Saint-Etienne), X. Armoiry (Lyon), E. Armoiry (Villeurbanne), D. Attivi (Neufchâteau), L. Audibert (Alix), A. Barbet (Amiens), M. Bascoulergue (Aulnay sous bois), C. Basselin (Saint-Genis-Laval), F. Baud (Paris), P. Bedouch (Grenoble), M. Belhout (Amiens), S. Benhaoua (Saint Denis), J. Beny (Alix), S. Berthet (Lyon), J. Berthou (Besancon), D. Bichard (Besancon), A.C. Blandin (Besancon), E. Blondel (Aix les Bains), S. Bonn Loue (Luneville), A. Bonvin (Lyon), F. Bouchand (Garches), P. Bouniot (Francheville), M. Bourdelin (Besancon), C. Bouret (Lyon), L. Bourguignon (Lyon), C. Bourne (Saint-Egrève), M. Bouteille (Lyon), J. Burdin (Lyon), C. Bureau (Alix), C. Bureau (Villeurbanne), M. Burgin (Luneville), M. Buyse (Paris), E. Cabaret (Hyerres), D. Cabelguenne (Pierre Benite), C. Capele (Saint André lez Lille), D. Carli (Vienne), I. Carpentier (Saint-Genis-Laval), E. Chambrey (Rang-du-Fliers), S. Chantel (Pierre Benite), N. Charhon (Vienne), B. Charpiat (Lyon), M. Chaumont (Le Chesnay), K. Civiletti (Martigues), B. Clerc (Besancon), M. Cleve (Vienne), R. Colomb (Saint-Etienne), C. Combe (Saint-Etienne), O. Conort (Paris), R. Contreras (Besancon), S. Crepin (Limoges), M. Creusat-Aube (Illkirch-Graffenstaden), A. Cuoq (Lyon), C. Decourcelle (Lomme), T. Delanoy (Vienne), C. Derharoutunian (Vienne), A. Deronze (Lyon); M. Desseignet (Lyon), S. Diallo (Le Chesnay), L. Dietrich (Strasbourg), A. Dory (Strasbourg), J. Dos-Reis (Paris), N. Duarte (Draveil), M.O. Duzanski (Strasbourg), L. Escofier (Mayenne), F. Fabre (Clermont-Ferrand), S.

1  
2  
3 Fare (Paris), J. Fillon (Paris), A. Fonteneau (Amiens), A. Fouquet (Vienne); A. Gadot (Lyon), H.  
4 Galtier (Vienne); I. Garreau (Epernay), C. Gerard (Francheville), R. Gervais (Saint Denis), O. Gloulou  
5 (Saint Denis), I. GraguebChatti (Vienne), A. Grass (Lyon), I. Gremeau (Clermont-Ferrand), P.Y.  
6 Grosse (Grasse), C. Guenaire (Rennes), F. Guerin (Aix les Bains), A. Guillermet (Lyon), S. Hannou  
7 (Illkirch-Graffenstaden), A. Henry (Lyon), G. Herbin (Bayeaux), N. Herment (Epernay), A.  
8 JanolyDumenil (Pierre Benite), C. Jarre (Vienne), L. Jovenaux (Martigues), M. Juste (Epernay), A.S.  
9 Kaczmarek (Clermont-Ferrand), W. KiniMatondo (Saint Denis), H. Labrosse (Lyon), C. Laillier  
10 (Strasbourg), E. Lamarre (Saint-Etienne), J. Lamoureux (Lyon), M. Laurent (Lyon), A. Le Bris (Le  
11 Chesnay), M. Le Duff (Rennes), R. Lecointre (Saint-Etienne), J. Lecompte (Grasse), M. Lefebvre  
12 (Lyon), A.L. Lepetit (Epernay), H. Lepont-Gilardi (Rennes), A. Lescoat (Villeurbanne), J.P. Levillain  
13 (Migennes), G. Liguori (Clermont-Ferrand), C. Lohier (Villeurbanne), C. Lupo (Lyon), J. Machon  
14 (Lyon), K. Maes (Vienne), G. Magerand (Villeurbanne), K. Mangerel (Epernay), S. Martelet (Saint-  
15 Etienne), D. Matanza (Francheville), V. Mermet (Saint-Genis-Laval), C. Mouchoux (Villeurbanne), Y.  
16 Nivoix (Strasbourg), A. Orly (Paris), E. Orng (Lyon), A. Oufella (Aulnay Sous Bois), I. Paillole  
17 (Toulouse), D. Pallot (Saint Denis), A. Papon (Lyon), L. Parnet (Paris), M. Paysant (Saint-Genis-  
18 Laval), E. Perrier-Cornet (Illkirch-Graffenstaden), S. Perrin (Besancon), D. Peynaud (Lyon), B.N.  
19 Pham (Vienne), D. Piney (Luneville), A. Pohyer (Montpellier), C. Porot (Besancon), J. Pouzoulet  
20 (Créteil), L. Poy (Lyon), E. Prevost (Epernay), E. Prunier (Besancon), F. Ranchon (Lyon), M. Rave  
21 (Besancon), C. Remonnay (Besancon), M. Remy (Ho-Chi-Minh Ville), M. Rhalimi (Chaumont-en-  
22 Vexin), C. Rioufol (Pierre Benite), A. Robelet (Paris), S. Roche (Epernay), F.X. Rose (Saint-Avé), R.  
23 Roubille (Vienne), A. Sambarino (Bourgoin Jallieu), D. Sankhare (Saint Denis), R. Santucci  
24 (Strasbourg), J. Scholler (Strasbourg), R. Selmi (Saint Denis), C. Stamm (Pierre Benite), C. Tanguy  
25 (Brest), D. Tessier (Saint Denis), H. Thery (Rang-du-Fliers), N. Thiriat (Paris), C. Turci (Saint-Genis-  
26 Laval), N. Vantard (Lyon), N. Vauvarin (Joigny), S. Vernardet (Annonay), D. Viard (Besancon), C.  
27 Vignand (Lyon), C. Villa (Vienne), P. Vonna (Epernay), S. Wacker (Strasbourg), N. Wereszczynski  
28 (Grasse), and L. Zerhouni (Paris).

29  
30  
31  
32  
33  
34  
35  
36  
37  
38  
39  
40  
41  
42  
43  
44  
45 We thank Kévin Mastrorillo, technical consultant of the Act-IP© observatory, for his contribution to the  
46 data extraction and data management.

#### 47 48 49 **Funding statement**

50 This research received no specific grant from any funding agency in the public, commercial, or not-for-  
51 profit sectors.

52  
53  
54 This study was supported by The French Society of Clinical Pharmacy, a nonprofit and independent  
55 foundation for clinical pharmacy research and development.

#### 56 57 58 **Statement on conflicts of interest**

59 The authors declare that they have no conflicts of interest.  
60

1  
2  
3 **Patient consent for publication**

4 Not required  
5

6  
7 **Ethical approval**

8 Ethical approval for the study was obtained on February 19, 2020 (CECIC Rhône-Alpes-Auvergne,  
9 Clermont-Ferrand, IRB 5891).  
10  
11

12  
13 **Data availability**

14 Deidentified participant data are available upon reasonable request to Act-IP© Administrator (email  
15 address: [actip@sfdc.eu](mailto:actip@sfdc.eu)).  
16  
17  
18  
19  
20  
21  
22  
23  
24  
25  
26  
27  
28  
29  
30  
31  
32  
33  
34  
35  
36  
37  
38  
39  
40  
41  
42  
43  
44  
45  
46  
47  
48  
49  
50  
51  
52  
53  
54  
55  
56  
57  
58  
59  
60

For peer review only

1  
2  
3  
4  
5  
6  
7  
8  
9  
10  
11  
12  
13  
14  
15  
16  
17  
18  
19  
20  
21  
22  
23  
24  
25  
26  
27  
28  
29  
30  
31  
32  
33  
34  
35  
36  
37  
38  
39  
40  
41  
42  
43  
44  
45  
46  
47  
48  
49  
50  
51  
52  
53  
54  
55  
56  
57  
58  
59  
60

**Summary table**

Table 1. Characteristics of Act-IP© observatory PISREs and PIs between 2014 to 2018.

For peer review only



### Summary Figures

Figure 1. Flowchart, PISRE selection in Act-IP© observatory (extraction on 11th February 2019)

Figure 2. Geographical location of French hospitals that entered data into the Act-IP © observatory between 2014 and 2018

For peer review only

Table 1. Characteristics of all Act-IP© observatory PISREs and PIs between 2014 to 2018.

| Characteristics                                   | PISRE        | PI total      | ratio |          |
|---------------------------------------------------|--------------|---------------|-------|----------|
|                                                   | (N = 27,058) | (N = 331,678) | %     | p-value  |
| Drug related problem                              |              |               |       |          |
| Supratherapeutic dosage                           | 7,436        | 72,912        | 10.2  |          |
| Non-conformity with guidelines/hospital formulary | 6,069        | 86,072        | 7.1   |          |
| Improper administration                           | 4,838        | 49,184        | 9.8   |          |
| Subtherapeutic dosage                             | 4,646        | 29,105        | 16.0  |          |
| Untreated indication                              | 2,366        | 30,138        | 7.9   |          |
| Drug without indication                           | 1,302        | 27,690        | 4.7   |          |
| Drug interaction                                  | 161          | 18,267        | 0.9   |          |
| Drug monitoring                                   | 111          | 10,303        | 1.1   |          |
| Adverse drug reaction                             | 65           | 5,854         | 1.1   |          |
| Failure to receive drug                           | 64           | 2,153         | 3.0   |          |
| Type of intervention                              |              |               |       |          |
| Dose adjustment                                   | 7,447        | 89,390        | 8.3   |          |
| Drug switch                                       | 6,649        | 85,033        | 7.8   |          |
| Drug discontinuation                              | 5,220        | 62,715        | 8.3   |          |
| Optimization of administration                    | 4,123        | 32,558        | 12.7  |          |
| Addition of new drug                              | 3,228        | 34,198        | 9.4   |          |
| Change of administration route                    | 213          | 6,978         | 3.1   |          |
| Drug monitoring                                   | 178          | 20,806        | 0.9   |          |
| Prescriber Acceptance                             |              |               |       |          |
| Interventions accepted                            | 21,356       | 227,223       | 9.4   | < 0.001* |

|                            |        |         |      |         |
|----------------------------|--------|---------|------|---------|
| Interventions not accepted | 3,068  | 51,957  | 5.9  |         |
| Not assessable             | 2,634  | 52,498  | 5.0  |         |
| Prescriber's status        |        |         |      |         |
| Senior                     | 15,152 | 180,863 | 8.4  | < 0.001 |
| Resident                   | 11,765 | 150,136 | 7.8  |         |
| Midwife**                  | 141    | 679     | 20.8 |         |
| Pharmacist's status        |        |         |      |         |
| Senior                     | 21,271 | 231,519 | 9.2  | < 0.001 |
| Resident                   | 4,640  | 86,728  | 5.4  |         |
| Not assessable**           | 1,147  | 13,431  | 8.5  |         |
| CPOE system status         |        |         |      |         |
| Not certified              | 21,385 | 226,878 | 9.4  | < 0.001 |
| Certified                  | 5,549  | 101,516 | 5.5  |         |
| Not assessable**           | 124    | 3,284   | 3.8  |         |
| Total                      | 27,058 | 331,678 | 8.2  |         |

*PI: pharmacist's intervention, PISRE: pharmacist's intervention identified as due to a system-related error, ratio = PISRE / PI Total, CPOE: computerized prescriber order entry*

*\*Not accepted and not assessable interventions have been regrouped for chi-square test; \*\*excluded from the chi-square analysis*

## References

1. Lewis PJ, Dornan T, Taylor D, Tully MP, Wass V, Ashcroft DM. Prevalence, incidence and nature of prescribing errors in hospital inpatients: a systematic review. *Drug Saf.* 2009;32(5):379-89.
2. Ashcroft DM, Lewis PJ, Tully MP, Farragher TM, Taylor D, Wass V, et al. Prevalence, Nature, Severity and Risk Factors for Prescribing Errors in Hospital Inpatients: Prospective Study in 20 UK Hospitals. *Drug Saf.*38(9) (2015) 833-43.
3. Vélez-Díaz-Pallarés M, Álvarez Díaz AM, Gramage Caro T, Vicente Oliveros N, Delgado-Silveira E, Muñoz García M, Cruz-Jentoft AJ, Bermejo-Vicedo T. Technology-induced errors associated with computerized provider order entry software for older patients. *Int. J. Clin. Pharm.* 39(4) (2017) 729-742.
4. Radley DC, Wasserman MR, Olsho LE, Shoemaker SJ, Spranca MD, Bradshaw B. Reduction in medication errors in hospitals due to adoption of computerized provider order entry systems. *J. Am. Med. Inform. Assoc.* 20(3) (2013) 470-6.
5. Nuckols TK, Smith-Spangler C, Morton SC, Asch SM, Patel VM, Anderson LJ, et al. The effectiveness of computerized order entry at reducing preventable adverse drug events and medication errors in hospital settings: a systematic review and meta-analysis. *Syst. Rev.* 3 (56) (2014). <https://doi.org/10.1186/2046-4053-3-56>.
6. Koppel R, Metlay JP, Cohen A, Abaluck B, Localio AR, Kimmel SE, et al. Role of Computerized Physician Order Entry Systems in Facilitating Medication Errors. *JAMA.* 293(10) (2005) 1197-203.
7. Brown CL, Mulcaster HL, Triffitt KL, Sittig DF, Ash JS, Reygate K, et al. A systematic review of the types and causes of prescribing errors generated from using computerized provider order entry systems in primary and secondary care. *J. Am. Med. Inform. Assoc.* 24(2) (2017) 432-40.
8. Horsky J, Kuperman GJ, Patel VL. Comprehensive analysis of a medication dosing error related to CPOE. *J. Am. Med. Inform. Assoc.* 12(4) (2005) 377-82.
9. Prescrire Editorial Staff. Electronic prescribing: the risk of errors and adverse effects. *Prescrire Int.* 25(167) (2016) 24-7.
10. Vialle V, Tiphine T, Poirier Y, Raingard E, Feldman D, Freville J-C. [To know, understand and combating medication errors related to computerized physician order entry]. *Ann. Pharm. Fr.* 69(3) (2011) 165-76.
11. Direction Générale de l'offre de Soins [Internet]. [2018 HIS Atlas. State of the art of hospital information systems][updated 2018 May 15; cited 2019Nov 9]. Available from:[https://solidarites-sante.gouv.fr/IMG/pdf/dgos\\_atlas\\_sih\\_2018.pdf](https://solidarites-sante.gouv.fr/IMG/pdf/dgos_atlas_sih_2018.pdf)
12. Westbrook JI, Reckmann M, Li L, Runciman WB, Burke R, Lo C, Baysari MT, Braithwaite J, Day RO. Effects of two commercial electronic prescribing systems on prescribing error rates in hospital in-patients: a before and after study. *PLoS Med.* 2012 Jan;9(1):e1001164.
13. Bouchand F, Thomas A, Zerhouni L, Dauphin A, Conort O. (Pharmaceutical interventions before and after computerization of the prescription in an internal medicine department] *Presse Médicale.* 2007 Mar 1;36(3, Part 1):410-8.

14. Hellot-Guersing M, Jarre C, Molina C, Leromain A-S, Derharoutunian C, Gadot A, et al. [Medication errors related to computerized physician order entry at the hospital: Record and analysis over a period of 4 years]. *Ann Pharm Fr.* 2016 Jan;74(1):61-70.
15. Westbrook JI, Baysari MT, Li L, Burke R, Richardson KL, Day RO. The safety of electronic prescribing: manifestations, mechanisms, and rates of system-related errors associated with two commercial systems in hospitals. *J Am Med Inform Assoc JAMIA.* 2013;20(6):1159-67.
16. Sittig DF, Ash JS, Zhang J, Osheroff JA, Shabot MM. Lessons from « Unexpected increased mortality after implementation of a commercially sold computerized physician order entry system ». *Pediatrics.* 2006;118(2):797-801.
17. Charpiat B, Bedouch P, Conort O, Rose FX, Juste M, Roubille R, Allenet B. Opportunities for medication errors and pharmacist's interventions in the context of computerized prescription order entry: a review of data published by French hospital pharmacists]. *Ann Pharm Fr.* 2012 Mar;70(2):62-74. doi: 10.1016/j.pharma.2012.02.002.
18. Ranji SR, Rennke S, Wachter RM. Computerised provider order entry combined with clinical decision support systems to improve medication safety: a narrative review. *BMJ Qual Saf.* 2014 Sep;23(9):773-80. doi: 10.1136/bmjqs-2013-002165.
19. Korb-Savoldelli V, Boussadi A, Durieux P, Sabatier B. Prevalence of computerized physician order entry systems-related medication prescription errors: A systematic review. *Int J Med Inform.* 2018 Mar;111:112-122. doi: 10.1016/j.ijmedinf.2017.12.022.
20. Allenet B, Bedouch P, Rose F-X, Escofier L, Roubille R, Charpiat B, et al. Validation of an instrument for the documentation of clinical pharmacists' interventions. *Pharm World Sci.* 2006 Aug;28(4):181-8.
21. Standardisation et Valorisation des Activités de Pharmacie Clinique – Descriptif [Internet]. Act-IP. [cited 2010 Apr 1]. Available from:<http://www.actip.sfpc.eu/actip/index/ficheip/>
22. Bedouch P, Charpiat B, Roubille R. The French Society of Clinical Pharmacy website for the documentation and analysis of pharmacist's interventions: purpose, instructions and perspectives. *J Pharm Clin.* 2007;26:40-4.
23. Haute Autorité de Santé[internet]. Logiciels d'Aide à la Prescription hospitaliers. [updated 2019 Oct 7; cited 2019 Nov 9]. Available from:[https://www.has-sante.fr/jcms/c\\_1751516/fr/logiciels-d-aide-a-la-prescription-hospitaliers](https://www.has-sante.fr/jcms/c_1751516/fr/logiciels-d-aide-a-la-prescription-hospitaliers)
24. Van der Sijs H, Aarts J, Vulto A, Berg M. Overriding of drug safety alerts in computerized physician order entry. *J Am Med Inform Assoc.* 2006 Mar-Apr;13(2):138-47
25. Wetterneck TB, Walker JM, Blosky MA, Cartmill RS, Hoonakker P, Johnson MA, Norfolk E, Carayon P. Factors contributing to an increase in duplicate medication order errors after CPOE implementation. *J Am Med Inform Assoc.* 2011 Nov-Dec;18(6):774-82.
26. Marcilly R, Ammenwerth E, Vasseur F, Roehrer E, Beuscart-Zéphir MC. Usability flaws of medication-related alerting functions: A systematic qualitative review. *J Biomed Inform.* 2015 Jun;55:260-71. doi: 10.1016/j.jbi.2015.03.006.
27. Haute Autorité de Santé[internet]. Référentiel de certification des logiciels hospitaliers par essai de type. [updated 2012Jun5; cited 2019 Oct6]. Available from:[https://www.has-sante.fr/upload/docs/application/pdf/2012-06/referentiel\\_certification\\_lap\\_hospitalier\\_juin12.pdf](https://www.has-sante.fr/upload/docs/application/pdf/2012-06/referentiel_certification_lap_hospitalier_juin12.pdf)

- 1  
2  
3 28. Prescrire rédaction. Prescription informatisée : un outil encore expérimental, trop peu régulé. *Rev*  
4 *Prescrire*. 2015;35(386):938-9.  
5  
6 29. Nanji KC, Rothschild JM, Salzberg C, Keohane CA, Zigmont K, Devita J, et al. Errors associated  
7 with outpatient computerized prescribing systems. *J Am Med Inform Assoc JAMIA*. 2011  
8 Dec;18(6):767-73.  
9  
10 30. Holmgren AJ, Adler-Milstein J, McCullough J. Are all certified EHRs created equal? Assessing  
11 the relationship between EHR vendor and hospital meaningful use performance. *J Am Med*  
12 *Inform Assoc*. 2018 Jun 1;25(6):654-660.  
13  
14 31. Ratwani RM, Fairbanks RJ, Hettinger AZ, Benda NC. Electronic health record usability: analysis  
15 of the user-centered design processes of eleven electronic health record vendors. *J Am Med*  
16 *Inform Assoc*. 2015 Nov;22(6):1179-82  
17  
18 32. Jaensch SL, Baysari MT, Day RO, Westbrook JI. Junior doctors' prescribing work after-hours and  
19 the impact of computerized decision support. *Int J Med Inform*. 2013 Oct;10(82):980-6.  
20  
21 33. Nerich V., Limas S., Demarchi M., Borg C, Rohrlich PS, Deconinck E. Computerized physician  
22 order entry of injectable antineoplastic drugs: an epidemiologic study of prescribing medication  
23 errors. *Int J Med Inform*. 2010 Oct; 79(10) :699-706.  
24  
25 34. Tolley CL. (2018) An investigation of healthcare professionals' experiences of training and using  
26 electronic prescribing systems: four literature reviews and two qualitative studies undertaken in  
27 the UK hospital context, Durham theses, Durham University. Available at Durham E-Theses  
28 Online: <http://etheses.dur.ac.uk/12845/>  
29  
30 35. Tully M, Buchan I. Prescribing errors during hospital inpatient care: factors influencing  
31 identification by pharmacists. *Pharm World Sci*. 2009;31(6):682-8.  
32  
33 36. Charpiat B, Derfoufi S, Larger M, Janoly-Dumenil A, Mouchoux C, Allenet B, et al.  
34 [Identification of knowledge deficits of pharmacy students at the beginning of the fifth year of  
35 pharmacy practice experience: Proposals to change the content of academic programs]. *Ann*  
36 *Pharm Fr*. 2016 Sept;74(5):404-12  
37  
38 37. Pontefract SK, Wilson K. Using electronic patient records: defining learning outcomes for  
39 undergraduate education. *BMC Med Educ*. 2019 Jan;19(1):30.  
40  
41 38. Accreditation Council of Pharmacy Education[internet]. Accreditation standards and key elements  
42 for the professional program in pharmacy leading to the doctor of pharmacy degree. Standards  
43 2016. [cited 2019 Oct 13]. Available from: [https://www.acpe-](https://www.acpe-accredit.org/pdf/Standards2016FINAL.pdf)  
44 [accredit.org/pdf/Standards2016FINAL.pdf](https://www.acpe-accredit.org/pdf/Standards2016FINAL.pdf).  
45  
46 39. Magrabi F, Ong MS, Runciman W, Coiera E. Patient safety problems associated with healthcare  
47 information technology: an analysis of adverse events reported to the US Food and Drug  
48 Administration. *AMIA Annu Symp Proc*. 2011;2011:853-7.  
49  
50 40. Magrabi F, Ong MS, Runciman W, Coiera E. Using FDA reports to inform a classification for  
51 health information technology safety problems. *J Am Med Inform Assoc*. 2012 Jan-Feb;19(1):45-  
52 53.  
53  
54 41. Beex-Oosterhuis MM, de Vogel EM, van der Sijs H, Dieleman HG, van den Bemt PM. Detection  
55 and correct handling of prescribing errors in Dutch hospital pharmacies using test patients. *Int J*  
56 *Clin Pharm* 2013;35:1188-1202.  
57  
58  
59  
60

- 1  
2  
3 42. Schiff, G.D., Amato, M.G., Egualo, T., et al., Computerised physician order entry related  
4 medication errors: analysis of reported errors and vulnerability testing of current systems. *BMJ*  
5 *Qual Saf*, 2015. 24(4): p. 264-71.  
6  
7 43. Condren, M., Honey, B.L., Carter, S.M., et al., Influence of a systems-based approach to  
8 prescribing errors in a pediatric resident clinic. *Acad Pediatr*, 2014. 14(5): p. 485-90.  
9  
10  
11  
12  
13  
14  
15  
16  
17  
18  
19  
20  
21  
22  
23  
24  
25  
26  
27  
28  
29  
30  
31  
32  
33  
34  
35  
36  
37  
38  
39  
40  
41  
42  
43  
44  
45  
46  
47  
48  
49  
50  
51  
52  
53  
54  
55  
56  
57  
58  
59  
60

For peer review only

1  
2  
3  
4  
5  
6  
7  
8  
9  
10  
11  
12  
13  
14  
15  
16  
17  
18  
19  
20  
21  
22  
23  
24  
25  
26  
27  
28  
29  
30  
31  
32  
33  
34  
35  
36  
37  
38  
39  
40  
41  
42  
43  
44  
45  
46  
47  
48  
49  
50  
51  
52  
53  
54  
55  
56  
57  
58  
59  
60STROBE Statement—Checklist of items that should be included in reports of *cross-sectional studies*

|                              | Item No | Recommendation                                                                                                                                                                       | Main Document                                                            |
|------------------------------|---------|--------------------------------------------------------------------------------------------------------------------------------------------------------------------------------------|--------------------------------------------------------------------------|
| <b>Title and abstract</b>    | 1       | (a) Indicate the study's design with a commonly used term in the title or the abstract                                                                                               | Page 1 – Title                                                           |
|                              |         | (b) Provide in the abstract an informative and balanced summary of what was done and what was found                                                                                  | Pages 2-3                                                                |
| <b>Introduction</b>          |         |                                                                                                                                                                                      |                                                                          |
| Background/rationale         | 2       | Explain the scientific background and rationale for the investigation being reported                                                                                                 | Page 5                                                                   |
| Objectives                   | 3       | State specific objectives, including any prespecified hypotheses                                                                                                                     | Page 6 – lines 35-37                                                     |
| <b>Methods</b>               |         |                                                                                                                                                                                      |                                                                          |
| Study design                 | 4       | Present key elements of study design early in the paper                                                                                                                              | Page 6 – lines 40-42                                                     |
| Setting                      | 5       | Describe the setting, locations, and relevant dates, including periods of recruitment, exposure, follow-up, and data collection                                                      | Page 6 – lines 46-50                                                     |
| Participants                 | 6       | (a) Give the eligibility criteria, and the sources and methods of selection of participants                                                                                          | Pages 6 – lines 46-50                                                    |
| Variables                    | 7       | Clearly define all outcomes, exposures, predictors, potential confounders, and effect modifiers. Give diagnostic criteria, if applicable                                             | Page 5 – lines 20-23<br>Page 6 – lines 41-42<br>Page 6-7 – lines 50 - 65 |
| Data sources/<br>measurement | 8*      | For each variable of interest, give sources of data and details of methods of assessment (measurement). Describe comparability of assessment methods if there is more than one group | Page 6 – lines 46 – 52<br>Page 7 – lines 53- 65                          |
| Bias                         | 9       | Describe any efforts to address potential sources of bias                                                                                                                            | Not applicable                                                           |
| Study size                   | 10      | Explain how the study size was arrived at                                                                                                                                            | Figure 1<br>Page 7 – lines 73-74                                         |
| Quantitative variables       | 11      | Explain how quantitative variables were handled in the analyses. If applicable, describe which groupings were chosen and why                                                         | Page 7 – lines 61-71                                                     |
| Statistical methods          | 12      | (a) Describe all statistical methods, including those used to control for confounding                                                                                                | Page 7 – lines 66 - 71                                                   |
|                              |         | (b) Describe any methods used to examine subgroups and interactions                                                                                                                  | Page 7 – lines 66 - 71                                                   |
|                              |         | (c) Explain how missing data were addressed                                                                                                                                          | Figure 1                                                                 |
|                              |         | (d) If applicable, describe analytical methods taking account of sampling strategy                                                                                                   | Not applicable                                                           |
|                              |         | (e) Describe any sensitivity analyses                                                                                                                                                | Not applicable                                                           |
| <b>Results</b>               |         |                                                                                                                                                                                      |                                                                          |
| Participants                 | 13*     | (a) Report numbers of individuals at each stage of study—eg numbers potentially eligible, examined for eligibility, confirmed                                                        | Figure 1                                                                 |



|                          |     |                                                                                                                                                                                                              |                                         |
|--------------------------|-----|--------------------------------------------------------------------------------------------------------------------------------------------------------------------------------------------------------------|-----------------------------------------|
|                          |     | eligible, included in the study, completing follow-up, and analysed                                                                                                                                          |                                         |
|                          |     | (b) Give reasons for non-participation at each stage                                                                                                                                                         | Not applicable                          |
|                          |     | (c) Consider use of a flow diagram                                                                                                                                                                           | Figure 1                                |
| Descriptive data         | 14* | (a) Give characteristics of study participants (eg demographic, clinical, social) and information on exposures and potential confounders                                                                     | Figure 2                                |
|                          |     | (b) Indicate number of participants with missing data for each variable of interest                                                                                                                          | Figure 1<br>Table 1                     |
| Outcome data             | 15* | Report numbers of outcome events or summary measures                                                                                                                                                         | Page 7 - 8 –<br>line 75 - 88            |
| Main results             | 16  | (a) Give unadjusted estimates and, if applicable, confounder-adjusted estimates and their precision (eg, 95% confidence interval). Make clear which confounders were adjusted for and why they were included | Table 1<br>Page 7 - 8 –<br>line 73 - 83 |
|                          |     | (b) Report category boundaries when continuous variables were categorized                                                                                                                                    | Not applicable                          |
|                          |     | (c) If relevant, consider translating estimates of relative risk into absolute risk for a meaningful time period                                                                                             | Not applicable                          |
| Other analyses           | 17  | Report other analyses done—eg analyses of subgroups and interactions, and sensitivity analyses                                                                                                               | Not applicable                          |
| <b>Discussion</b>        |     |                                                                                                                                                                                                              |                                         |
| Key results              | 18  | Summarise key results with reference to study objectives                                                                                                                                                     | Page 8_9 –<br>lines 95-108              |
| Limitations              | 19  | Discuss limitations of the study, taking into account sources of potential bias or imprecision. Discuss both direction and magnitude of any potential bias                                                   | Page 11 - 12 –<br>lines 164- 192        |
| Interpretation           | 20  | Give a cautious overall interpretation of results considering objectives, limitations, multiplicity of analyses, results from similar studies, and other relevant evidence                                   | Page 9-11 –<br>lines 103-163            |
| Generalisability         | 21  | Discuss the generalisability (external validity) of the study results                                                                                                                                        | Page 11 - 12 –<br>lines 170- 196        |
| <b>Other information</b> |     |                                                                                                                                                                                                              |                                         |
| Funding                  | 22  | Give the source of funding and the role of the funders for the present study and, if applicable, for the original study on which the present article is based                                                | Page 14 – lines<br>270-275              |

\*Give information separately for exposed and unexposed groups.

**Note:** An Explanation and Elaboration article discusses each checklist item and gives methodological background and published examples of transparent reporting. The STROBE checklist is best used in conjunction with this article (freely available on the Web sites of PLoS Medicine at <http://www.plosmedicine.org/>, Annals of Internal Medicine at <http://www.annals.org/>, and Epidemiology at <http://www.epidem.com/>). Information on the STROBE Initiative is available at [www.strobe-statement.org](http://www.strobe-statement.org).

1  
2  
3  
4  
5  
6  
7  
8  
9  
10  
11  
12  
13  
14  
15  
16  
17  
18  
19  
20  
21  
22  
23  
24  
25  
26  
27  
28  
29  
30  
31  
32  
33  
34  
35  
36  
37  
38  
39  
40  
41  
42  
43  
44  
45  
46  
47  
48  
49  
50  
51  
52  
53  
54  
55  
56  
57  
58  
59  
60

Figure 1. Flowchart, pharmacist interventions system-related errors (PISRE) selection in Act-IP© observatory (extraction on 11<sup>th</sup> February 2019)

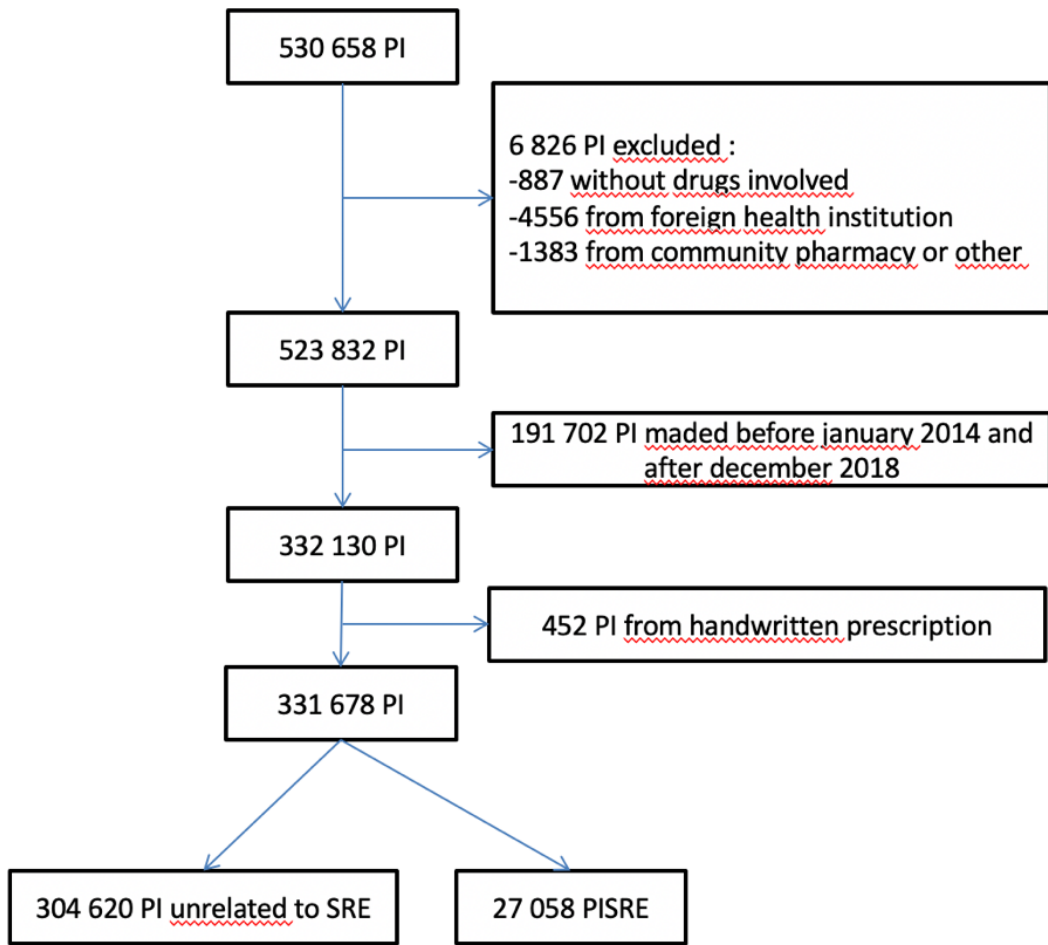

only

Figure 2. Geographical location of French hospitals that entered data into the Act-IP © observatory between 2014 and 2018

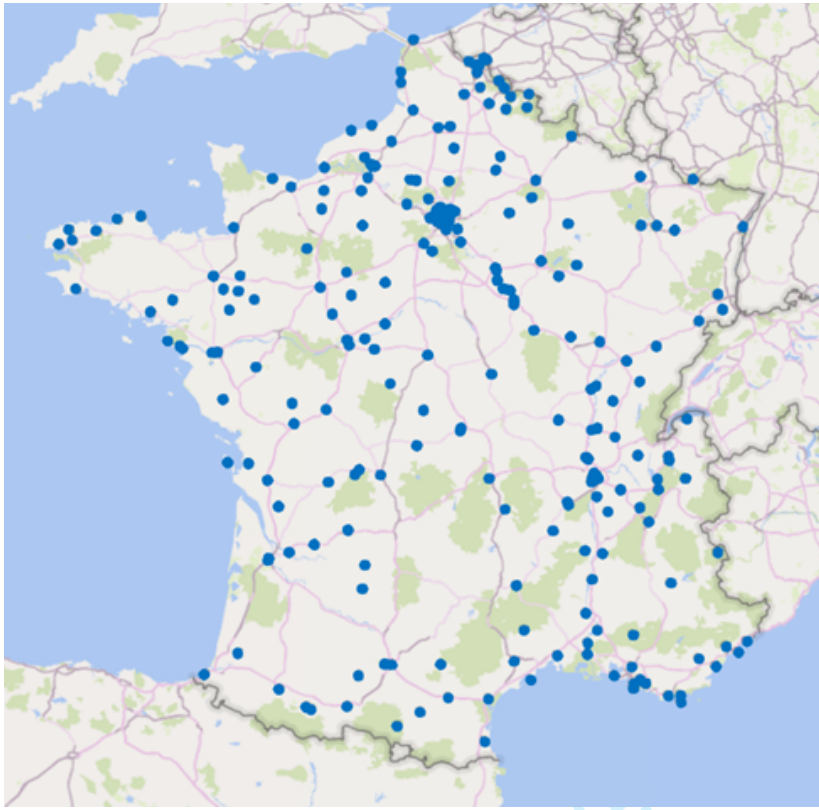

## Appendix 1. The Pharmacist intervention form

|                                     |
|-------------------------------------|
| <b>PHARMACIST INTERVENTION FORM</b> |
|-------------------------------------|

|                    |                           |                     |
|--------------------|---------------------------|---------------------|
| 📅 <b>DATE:</b> / / | 📁 <b>INTERVENTION N°:</b> | 🏠 <b>CENTER N°:</b> |
|--------------------|---------------------------|---------------------|

**PATIENT:**

Last name:

First name:

Age:        years / Weight:    Kg

Sex:  M         F**Hospital ward:**

- Psychiatry  
 Acute care  
 Long term care  
 Rehabilitation ward

**1- DRUG RELATED PROBLEM (1 choice):**

- 1  Non conformity to guidelines or contra-indication  
2  Untreated indication  
3  Subtherapeutic dosage  
4  Supratherapeutic dosage  
5  Drug without indication  
6  Drug interaction  
     To be taken into account  
     Use with caution  
     Combination to be avoided  
     Combination contra-indicated  
     Documented but not in VIDAL®  
7  Adverse drug reaction  
8  Improper administration  
9  Failure to receive drug  
10  Drug monitoring

**2- INTERVENTION (1 choice):**

- 1  Addition of a new drug  
2  Drug discontinuation  
3  Drug switch  
4  Change of administration route  
5  Drug monitoring  
6  Administration modalities optimisation  
7  Dose adjustment

**DRUG NAME (INN):****3- DRUG CLASSIFICATION (ATC):**

- A Alimentary tract & metabolism  
 B Blood & blood forming organs  
 C Cardiovascular system  
 D Dermatological  
 G Genito urinary system & sex hormones  
 H Systemic hormonal preparations  
 J Anti-infective for systemic use  
 L Anti-neoplastic & immunomodulating agents  
 M Musculo-skeletal system  
 N Nervous system  
 P Antiparasitic products  
 R Respiratory system  
 S Sensory organs  
 V Various

**4- INTERVENTION FOLLOW-UP:**

- Accepted  
 Non accepted  
 Non assessable

|                                                                                                                        |
|------------------------------------------------------------------------------------------------------------------------|
| <b>DETAILS</b> ⇒If necessary, give details on any aspects of the detected DRP and describe the intervention, precisely |
|------------------------------------------------------------------------------------------------------------------------|

**Context****Problem****Intervention**

Appendix 2. Examples of PISRE and drug by drug-related problems (N = 27,822)

| Drug-related problem                          | Number of drugs involved – n (%) | Most frequent drug ( <b>international nonproprietary names</b> ) (n)                                             | Examples                                                                                                          |
|-----------------------------------------------|----------------------------------|------------------------------------------------------------------------------------------------------------------|-------------------------------------------------------------------------------------------------------------------|
| Supratherapeutic dosage                       | 7,571 (27.2)                     | Paracetamol (1,043), tramadol (223), pantoprazole (212), enoxaparin (204)                                        | “Duplicate prescription: 1 in predefined protocol and 1 outside predefined protocol = 8 g of paracetamol per day” |
| Non-conformity to guidelines/contraindication | 6,212 (22.3)                     | Alfuzosin (515), dutasteride (493), silodosin (469), paracetamol (460), tamsulosin (373)                         | “prescription of dutasteride, which is not in the hospital drug formulary, with a risk of treatment omission”     |
| Improper administration                       | 4,972 (17.9)                     | Paracetamol (277), levothyroxine (130), pregabalin (130), methylprednisolone (124)                               | “selection of IV terbutaline for administration by aerosol”                                                       |
| Subtherapeutic dosage                         | 4,738 (17.0)                     | Enoxaparin (965), heparin (450), tinzaparin (186), paracetamol (140), macrogol (105),                            | “Enoxaparin 4000 UI/0.4 ml prescription: 1 IU instead of 1 syringe”                                               |
| Untreated indication                          | 2,441 (8.8)                      | acetylsalicylic acid (82), pregabalin (80), paracetamol (74), tinzaparin (69), bisoprolol (69), enoxaparin (68), | “prescription of pregabalin not renewed (hospital stay longer than the duration of the prescription)”             |

|                                                                                        |                         |             |                                                                                                                           |                                                                                                                                                                                 |
|----------------------------------------------------------------------------------------|-------------------------|-------------|---------------------------------------------------------------------------------------------------------------------------|---------------------------------------------------------------------------------------------------------------------------------------------------------------------------------|
| 1<br>2<br>3<br>4<br>5<br>6<br>7<br>8<br>9<br>10<br>11<br>12<br>13<br>14                | Drug without indication | 1,340 (4.8) | Pantoprazole (66), amoxicillin and beta-lactamase inhibitor (44), cholecalciferol (40), ceftriaxone (34), enoxaparin (30) | “duplicate prescription of pantoprazole per os and IV by two prescribers”                                                                                                       |
| 15<br>16<br>17<br>18<br>19<br>20<br>21<br>22<br>23<br>24<br>25<br>26<br>27<br>28<br>29 | Drug interaction        | 262 (0.9)   | Amiodarone (27), fluindione (9), levothyroxine (9)                                                                        | “cordarone and escitalopram combination contra-indicated: risk of “torsade de pointes” not modified during drug interaction alert with Clinical Decision Support System (CDSS)” |
| 30<br>31<br>32<br>33<br>34<br>35<br>36                                                 | Drug monitoring         | 124 (0.4)   | Fluindione (25), polystyrene sulfonate (8), paracetamol (4)                                                               |                                                                                                                                                                                 |
| 37<br>38<br>39<br>40<br>41<br>42<br>43<br>44                                           | Adverse drug reaction   | 70 (0.3)    | Polystyrene sulfonate (11), furosemide (6), atorvastatin (4), tramadol (3), macrogol (3)                                  | “increased risk of adverse reactions by the combination of atorvastatin and fenofibrate”                                                                                        |
| 45<br>46<br>47<br>48<br>49<br>50<br>51<br>52<br>53                                     | Failure to receive drug | 92 (0.3)    | Esomeprazole (3), cholecalciferol (3), acetylsalicylic acid (3), furosemide (3)                                           | “Prescription of furosemide not appearing on the nursing plan”                                                                                                                  |

# BMJ Open

## Characteristics of Pharmacist's interventions triggered by prescribing errors related to computerized physician order entry in French hospitals: a cross-sectional observational study

|                                 |                                                                                                                                                                                                                                                                                                                                                                                                                                                                                                                                              |
|---------------------------------|----------------------------------------------------------------------------------------------------------------------------------------------------------------------------------------------------------------------------------------------------------------------------------------------------------------------------------------------------------------------------------------------------------------------------------------------------------------------------------------------------------------------------------------------|
| Journal:                        | <i>BMJ Open</i>                                                                                                                                                                                                                                                                                                                                                                                                                                                                                                                              |
| Manuscript ID                   | bmjopen-2020-045778.R2                                                                                                                                                                                                                                                                                                                                                                                                                                                                                                                       |
| Article Type:                   | Original research                                                                                                                                                                                                                                                                                                                                                                                                                                                                                                                            |
| Date Submitted by the Author:   | 09-Aug-2021                                                                                                                                                                                                                                                                                                                                                                                                                                                                                                                                  |
| Complete List of Authors:       | Videau, Manon; TIMC-IMAG, CNRS-UMR 5525/ThEMAS/Université Grenoble Alpes; CHU Grenoble Alpes, Pharmacie Charpiat, Bruno; TIMC-IMAG, CNRS-UMR 5525/ThEMAS/Université Grenoble Alpes; Hopital de la Croix-Rousse, Pharmacie Vermorel, Céline; TIMC-IMAG, CNRS-UMR 5525/ThEMAS/Université Grenoble Alpes<br>Bosson, J.L; TIMC-IMAG, CNRS-UMR 5525/ThEMAS/Université Grenoble Alpes<br>Conort, Ornella; Hopital Cochin, Pharmacie<br>Bedouch, Pierrick; TIMC-IMAG, CNRS-UMR 5525/ThEMAS/Université Grenoble Alpes; CHU Grenoble Alpes, Pharmacie |
| <b>Primary Subject Heading</b>: | Health informatics                                                                                                                                                                                                                                                                                                                                                                                                                                                                                                                           |
| Secondary Subject Heading:      | Health informatics, Health services research, Pharmacology and therapeutics                                                                                                                                                                                                                                                                                                                                                                                                                                                                  |
| Keywords:                       | Health & safety < HEALTH SERVICES ADMINISTRATION & MANAGEMENT, Adverse events < THERAPEUTICS, Health informatics < BIOTECHNOLOGY & BIOINFORMATICS                                                                                                                                                                                                                                                                                                                                                                                            |
|                                 |                                                                                                                                                                                                                                                                                                                                                                                                                                                                                                                                              |

SCHOLARONE™  
Manuscripts

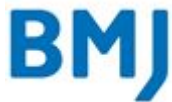

I, the Submitting Author has the right to grant and does grant on behalf of all authors of the Work (as defined in the below author licence), an exclusive licence and/or a non-exclusive licence for contributions from authors who are: i) UK Crown employees; ii) where BMJ has agreed a CC-BY licence shall apply, and/or iii) in accordance with the terms applicable for US Federal Government officers or employees acting as part of their official duties; on a worldwide, perpetual, irrevocable, royalty-free basis to BMJ Publishing Group Ltd ("BMJ") its licensees and where the relevant Journal is co-owned by BMJ to the co-owners of the Journal, to publish the Work in this journal and any other BMJ products and to exploit all rights, as set out in our [licence](#).

The Submitting Author accepts and understands that any supply made under these terms is made by BMJ to the Submitting Author unless you are acting as an employee on behalf of your employer or a postgraduate student of an affiliated institution which is paying any applicable article publishing charge ("APC") for Open Access articles. Where the Submitting Author wishes to make the Work available on an Open Access basis (and intends to pay the relevant APC), the terms of reuse of such Open Access shall be governed by a Creative Commons licence – details of these licences and which [Creative Commons](#) licence will apply to this Work are set out in our licence referred to above.

Other than as permitted in any relevant BMJ Author's Self Archiving Policies, I confirm this Work has not been accepted for publication elsewhere, is not being considered for publication elsewhere and does not duplicate material already published. I confirm all authors consent to publication of this Work and authorise the granting of this licence.



1  
2  
3 **Characteristics of Pharmacist’s interventions triggered by prescribing errors related to**  
4 **computerized physician order entry in French hospitals: a cross-sectional observational study**  
5

6 Manon Videau<sup>1,2</sup>, Bruno Charpiat<sup>1,3</sup>, Céline Vermorel<sup>1</sup>, Jean-Luc Bosson<sup>1</sup>, Ornella Conort<sup>4</sup>, and Pierrick  
7 Bedouch<sup>1,2</sup> on behalf of the SFPC VIP– Act-IP© group<sup>5</sup>  
8

9 <sup>1</sup>Université Grenoble Alpes, CNRS/TIMC-IMAG UMR5525/ThEMAS, F-38041, Grenoble, France

10 <sup>2</sup>Pharmacy Department, Grenoble Alpes University Hospital, 38043, Grenoble, France

11 <sup>3</sup>Pharmacy Department, Hôpital Croix Rouse, Hospices civils de Lyon, 69004, Lyon, France

12 <sup>4</sup>Pharmacy Department, Hôpital Cochin, Assistance Publique Hôpitaux de Paris, 75879 Paris, France

13 <sup>5</sup>Working group “Valorization of Pharmaceutical Interventions/ Valorisation des Interventions  
14 Pharmaceutiques – Act-IP©” of the French Society for Clinical Pharmacy (see composition and  
15 members in acknowledgments)  
16

17  
18  
19  
20  
21  
22 **Corresponding author:**

23 Manon Videau

24 Université Grenoble Alpes

25 CNRS/TIMC-IMAG/UMR5525/ThEMAS, F-38041,

26 Grenoble, France

27 Email: videau.manon@gmail.com  
28  
29  
30  
31  
32

33 **Keywords:** drug related problem, prescribing error, pharmacist intervention, computerized physician  
34 order entry (CPOE)  
35  
36  
37  
38

39 Abstract: 305/300 words

40  
41 Main text: 3125/4000 words  
42  
43  
44  
45  
46  
47  
48  
49  
50  
51  
52  
53  
54  
55  
56  
57  
58  
59  
60

## Abstract

### Objectives

Computerized physician order entry (CPOE) systems facilitate the review of medication orders by pharmacists. Reports have emerged that show conception flaws or the misuse of CPOE systems generate prescribing errors. We aimed to characterize pharmacist interventions (PIs) triggered by prescribing errors identified as system-related errors (SREs) in French hospitals.

### Design

This was a cross-sectional observational study based on PIs prospectively documented in the Act-IP© observatory database from January 2014 to December 2018.

### Setting

PISREs from 319 French computerized healthcare facilities were analyzed.

### Participants

Among the 319 French hospitals, 232 (72.7%) performed SRE interventions, involving 652 (51%) pharmacists.

### Results

Among the 331,678 PIs recorded, 27,058 were qualified as due to SREs (8.2%). The main drug-related problems associated with PISREs were suprathereapeutic (27.5%) and subtherapeutic dosage (17.2%), non-conformity with guidelines/contraindications (22.4%), and improper administration (17.9%). The PI prescriber acceptance rate was 78.9% for SREs versus 67.6% for other types of errors. The PISRE ratio was estimated relative to the total number of PIs. Concerning the certification status of CPOE systems, the PISRE ratio was 9.4% for non-certified systems versus 5.5% for certified systems ( $p$ -value<0.001). The PISRE ratio for senior pharmacists was 9.2% and that for pharmacy residents 5.4% ( $p$ -value<0.001). Concerning prescriptions made by graduate prescribers and those made by residents, the PISRE ratio was 8.4 % and 7.8%, respectively ( $p$ -value<0.001).

### Conclusion

1  
2  
3 Computer-related prescribing errors are common. The PI acceptance rate by prescribers was higher than  
4 that observed for PIs that were not CPOE related. This suggests that physicians consider the potential  
5 clinical consequences of SREs for patients to be more frequently serious than interventions unrelated to  
6 CPOE. CPOE medication review requires continual pharmacist diligence to catch these errors. The  
7 significantly lower PISRE ratio for certified software should prompt patient safety agencies to undertake  
8 studies to identify the safest software and discard software that is potentially dangerous.  
9  
10  
11  
12  
13  
14  
15  
16  
17  
18  
19  
20  
21  
22  
23  
24  
25  
26  
27  
28  
29  
30  
31  
32  
33  
34  
35  
36  
37  
38  
39  
40  
41  
42  
43  
44  
45  
46  
47  
48  
49  
50  
51  
52  
53  
54  
55  
56  
57  
58  
59  
60

For peer review only

## Article Summary

### Strengths and limitations of this study

- This study provides an overview of prescribing issues related to the use of CPOE systems at the national level.
- Beyond this large register of prescribing problems related to CPOE use, this is the first study to evaluate pharmacist interventions in daily practice for such a large sample of interventions, pharmacists, and hospitals.
- This study focuses on declarative data based on interventions performed by hospital pharmacists.
- These pharmacist interventions highlight prescription problems, but they are not exhaustive.

## 1. Introduction

Every day, numerous hospitalized patients are subject to drug-related problems (DRPs), resulting in suboptimal therapy, suffering, and decreased quality of life, as well as high healthcare costs for society [1, 2]. Computerized physician order entry (CPOE) systems, along with clinical decision support systems, improve the safety, quality, and value of patient care [3]. According to a meta-analysis, CPOE systems have reduced hospital medication errors by approximately 12.5% IC95% [10.6-14.4%] [4]. However, CPOE systems also have the potential to introduce or contribute to errors. Indeed, new mechanisms that lead to prescription errors have been identified with CPOE: wrong patient selection, failure to report drug allergies, incorrect entry or wrong selection of medication, dose, route, or time of administration, and confusing free-text comments [5-10].

In France, as in other countries, various incentives and requirements have been put in place to encourage computerized drug prescribing, such as France's "Digital Hospital" program [11]. Since the 2000s, prescribing errors associated with the use of CPOE have been slowly coming to light as healthcare has become increasingly computerized [9]. Compared to handwritten prescriptions, the analysis of electronic prescriptions requires a particular effort on the part of pharmacists and other health professionals to detect errors [9]. System-related errors (SREs) are defined as those in which the electronic prescribing system functionality or design contributed to the error, with little possibility that another cause, such as lack of knowledge, produced the error. For example, an order for an inappropriate drug located on a drop-down menu next to a likely drug selection is a system-related error [12].

A pharmacist intervention (PI) due to a SRE is defined as any PI resulting from the identification of a prescribing error by a pharmacist that would probably not have occurred in the context of a handwritten prescription and of which at least one cause is related to the use of a computer (software system configuration issue, software functionality issue, or software misuse) [13-16].

Most studies concerning PIs triggered by system-related prescribing errors were conducted within a single hospital [17-19]. As a result, it is not possible to assess the extent of prescribing errors related to electronic systems or draw conclusions about subsequent PIs at a national level.

1  
2  
3 In 2003, the French Society of Clinical Pharmacy (SFPC) developed and validated a tool for classifying  
4 and documenting clinical PIs [20]. This tool allows the reporting of DRPs and PIs performed during the  
5 daily review of medication orders [21]. In 2006, a website, Act-IP©, was created with the objectives to  
6  
7 (a) create a documentation system that is freely accessible to any pharmacist, through the French Society  
8 of Clinical Pharmacy Web site (<http://www.actip.sfpc.eu/actip/index/ficheip/>) and (b) pool the data  
9 recorded by all pharmacists to conduct epidemiological studies concerning DRPs detected by  
10 pharmacists [22]. The data recording is on a voluntary basis. The pooling of PIs constitutes an  
11 observatory of clinical pharmacy practices, called the “Act-IP© Observatory”.

12  
13  
14  
15  
16  
17  
18  
19  
20  
21 The aim of this study was to characterize PIs triggered due to SREs in French hospitals between 2014  
22 and 2018. Our secondary objective was to determine the physician acceptance rate and its frequency  
23 according to the certification status (certified versus non-certified) of the CPOE systems.

## 28 **2. Methods**

### 30 *2.1. Study design*

31  
32 This was a cross-sectional observational study using PIs prospectively documented in the Act-IP©  
33 observatory over a five-year period from January 1, 2014 to December 31, 2018. The main outcome was  
34 a PI due to a SRE (PISRE) reported by French hospital pharmacists on the Act-IP© observatory. Ethical  
35 approval for the study was obtained on February 19, 2020 (CECIC Rhône-Alpes-Auvergne, Clermont-  
36 Ferrand, IRB 5891).

### 43 *2.2. Data sources*

44  
45 The data comes from PIs registered in the Act-IP© Observatory from January 2014 to December 2018.  
46  
47 Based on the SFPC criteria, using the report form developed and validated for routine documentation of  
48 the PIs, Act-IP© users completed the online report form notifying the date, type of DRP, PI, type of  
49 drug involved (according to the ATC (Anatomical Therapeutic Chemical) classification), acceptance of  
50 the intervention by the prescriber, and free-text details of the context. Ten categories were determined  
51 for DRPs and seven for PIs (Appendix 1). A PI was considered to be “accepted” if the physician took it  
52 into account and modified the prescription as suggested by the pharmacist or “refused” if the prescription  
53  
54  
55  
56  
57  
58  
59  
60

1  
2  
3 remained unchanged, including cases of expressed refusal by the prescriber. If acceptance of the  
4 intervention was impossible to ascertain (i.e. discharged patients or those transferred to another ward  
5 before acceptance), the PI was noted as “not assessable”. The pharmacist’s academic background,  
6 hospital characteristics, and software used were documented online by the pharmacist when he/she  
7 registered onto the Act-IP© website. To be registered onto the Act-IP© website, pharmacists had prior  
8 to accept terms and conditions and allowed the use of their data for analysis. Since July 2013,  
9 pharmacists have been able to indicate whether the DRP was “related to the electronic system” or not  
10 for each registered PI. For the purpose of this study, PISREs were DRPs rated by each pharmacist as  
11 “related to the electronic system” in the Act-IP© website.  
12  
13  
14  
15  
16  
17  
18  
19  
20  
21  
22

23 The reliability of the classification of the type of drug therapy problem and intervention according to  
24 the SFPC classification was determined in a previous study by assessing the degree of agreement  
25 between 12 pharmacists using the kappa concordance coefficient (kappa=0.76 for drug problems and  
26 kappa=0.89 for drug interventions) [20]. Database quality controls were performed by an independent  
27 pharmacist to ensure that data coding and entry errors were minimal [22].  
28  
29  
30  
31  
32  
33

34 French law made the certification of CPOE systems mandatory on December 29, 2011. However, two  
35 decrees abolished this obligation in 2017. Certification is now based on the sole initiative of the software  
36 developer. Forty-eight hospital CPOE software packages are currently certified by the agency for patient  
37 safety [Haute Autorité de Santé (HAS)] [23]. For our analysis, PISREs were classified according to the  
38 HAS status of the CPOE system (certified versus not certified).  
39  
40  
41  
42  
43  
44

### 45 *2.3. Analysis*

46 The PISRE ratio was estimated relative to the total number of PIs. Proportions were compared using the  
47 chi-square test. PISREs coded as “refused” or “not assessable” were combined and compared to the  
48 accepted PISREs. Probability values < 0.001 were considered to be statistically significant. Statistical  
49 analyses were performed using Stata 13 (Stata Corporation, College Station, Texas, USA). Several  
50 qualitative examples are given to illustrate PISREs.  
51  
52  
53  
54  
55  
56  
57

### 58 *2.4. Study participants and public involvement*

1  
2  
3 This research was done without study participant involvement. Patients and/or the public were not  
4 involved in the design, or conduct, or dissemination plans of this research.  
5  
6  
7

#### 8 **4. Results**

9  
10 From January 2014 to December 2018, 331,678 PIs were entered into the Act-IP© observatory. Among  
11 them, 27,058 (8.2%) were indicated to be system-related prescribing errors (Figure 1).  
12  
13  
14

15 Over the study period, 1,219 pharmacists from 319 hospitals recorded PIs in the Act-IP© observatory  
16 database. The geographical location of the hospitals involved is shown in Figure 2. Among them, 232  
17 (72.7%), involving 652 (51%) pharmacists, performed SRE interventions. Among the 319 hospitals, 87  
18 (27.3%) did not qualify any PIs as being due to a SRE. PIs come from 82 software involving 19 certified  
19 systems.  
20  
21  
22  
23  
24

25 The characteristics of the PISREs are summarized in Table 1. The most commonly identified type of  
26  
27  
28  
29  
30  
31  
32  
33  
34  
35  
36  
37  
38  
39  
40  
41  
42  
43  
44  
45  
46  
47  
48  
49  
50  
51  
52  
53  
54  
55  
56  
57  
58  
59  
60  
The characteristics of the PISREs are summarized in Table 1. The most commonly identified type of  
DRP was “supratherapeutic dosage”, followed by “non-conformity with guidelines/contraindications”  
and “improper administration”. Among the 27,058 PISREs, 78.9% (n = 21,356) were accepted. The  
PISRE ratio was 9.4% for non-certified systems versus 5.5% for certified systems (p-value < 0.001).  
Appendix 2 presents examples of drug-related problems classified as being triggered by prescribing  
errors due to the CPOE system. For example: Prescription errors can be the same whether they are  
handwritten prescriptions or computer-assisted prescriptions. Indeed, the combination of amiodarone  
and escitalopram can appear on handwritten prescription because of prescriber’s lack of knowledge.  
With CPOE, Clinical Decision Support System (CDSS) tool can alert on drug-drug interaction.  
However, high frequency of alerts and dozens of daily interruptions for clinicians are responsible of  
"alert fatigue" and practitioners override alerts [24]. We can also find duplicate orders, meaning the  
same drug is prescribed twice. With predefined order set, it is common to have 8 grams of paracetamol  
per day prescribed. Duplication errors are partially explained by the fact that many screens are required  
to view patient medications, making intrinsically difficult to spot duplicates [25].

#### 57 **5. Discussion**



1  
2  
3 This study provides an overview of prescription problems related to CPOE systems used in French  
4 hospitals. It provides insights into the main situations and medications involved in computer-related  
5 prescribing problems detected by pharmacists by providing a broad description of PIs performed during  
6 the daily review of routine medication orders. Thus one strength of this study is that it is based on a  
7 large number of hospitals scattered throughout France, as no prior study of such extent evaluating PIs  
8 in daily practice has been published.  
9  
10  
11  
12  
13  
14

### 15 16 17 *5.1. PISRE rate*

18 Our PISRE rate (8.2%) is within the range reported by Korb-Savoldelli et al. [19]. They analyzed peer-  
19 reviewed studies (n = 14) that quantitatively reported medication-prescription errors related to CPOE.  
20 The prevalence of CPOE system-related medication errors relative to all prescription medication errors  
21 ranged from 6.1 to 77.7% (median = 26.1% [IQR:17.6–42,1]) and was less than 6.3% relative to the  
22 number of prescriptions reviewed. Ours is the first large-scale descriptive study using an observatory  
23 hospital pharmacy practice database to study computer-related prescribing errors.  
24  
25  
26  
27  
28  
29  
30  
31

### 32 33 *5.2. DRPs induced by CPOE*

34 The main category of DRPs identified as PISREs were suprathereapeutic (27.5%, 7,436) and  
35 subtherapeutic dosage (17.2%, 4,646), non-conformity to guidelines/hospitals' drug formularies (22.4%,  
36 6,069) (i.e. medication selection non-compliant with the hospital drug formulary), and improper  
37 administration (17.9%, 4,838) (i.e. incorrect or no formulation, wrong timing). According to Korb-  
38 Savoldelli et al., all studies reported “wrong dose” and “wrong drug” errors [19], with the “wrong dose”  
39 error being that most frequently reported (from 7 to 67.4%, median = 31.5% [IQR:20.5–44.5]). Many of  
40 the prescription errors due to CPOE systems can have serious consequences for patients, depending on  
41 the clinical circumstances. Although some of are unlikely to occur (e.g. IV ketoprofen 150 ampoules/day  
42 instead of 150 mg/d), they nevertheless illustrate flaws in certain CPOE systems [26]. However, our  
43 data do not allow the discrimination between software errors, connection problems, and human error.  
44  
45  
46  
47  
48  
49  
50  
51  
52  
53  
54

### 55 56 57 *5.3. CPOE systems*

1  
2  
3 The proportion of PIs triggered by software-related prescription errors was higher for non-certified  
4 (9.4%) than certified software (5.5%). In France, certification tests produced by the HAS are intended  
5 to technically assess the functionality of the software in various situations, as the CPOE evaluation  
6 methodology simulates various clinical scenarios [27]. French regulations do not require CPOE  
7 developers to carry out usability studies before the systems are marketed. Nevertheless, despite the  
8 limitations of this type of certification criteria, which have already been highlighted [28], our results  
9 show that prescribing with CPOE-certified systems results in fewer prescription errors than prescribing  
10 with non-certified software. These results are consistent with those of other studies, i.e. all software is  
11 not equal and some is safer than others [29-31].

#### 22 23 *5.4. Prescribers*

24 The PISRE ratio was higher for prescriptions made by graduate prescribers (8.4%) than medical  
25 residents (7.8%) (p-value < 0.001). This finding is, at first glance, counterintuitive, as one would expect  
26 that a prescriber who has been practicing for several years in the same health facility would make fewer  
27 CPOE-related prescription errors with the software than a resident who has only been using the software  
28 for a few months. Observational studies show that medical residents make most prescriptions and  
29 transcribe them to the software prescription instructions of senior prescribers during the medical  
30 examination [32]. It is thus possible that, in some hospitals, senior physicians are only occasional users  
31 of the prescription software. According to Nerich et al., the occasional use of software (< 1 prescription  
32 per day) is a risk factor for prescription error (OR = 3.85, 95% CI [2.08-7.14]) [33]. Tolley described  
33 how a junior doctor remarked that there was no one he could ask for help with using the ePrescribing  
34 system, as he was “the most experienced person on this floor with regards to the ePrescribing system”.  
35 She also described how one consultant admitted she had not “learnt how to prescribe properly” because  
36 she did not “use the system often enough and regularly enough to know the quirks and tweaks”. This  
37 consultant relied on her junior staff to prescribe on the system [34].

#### 54 55 *5.5. Act-IP© Pharmacist’ users*

56 The PISRE ratio for senior pharmacists (9.2%) was higher than that of pharmacy residents (5.4%). This  
57 is consistent with the results of a study performed in a UK teaching hospital showing that the likelihood  
58  
59  
60

1  
2  
3 of senior pharmacists identifying errors was greater than that of junior pharmacists [35] and in  
4 accordance with our expectations. A study concerning French pharmacy students showed that they trust  
5 the contribution of computerization to healthcare without critical analysis. This results in overconfidence  
6 in the computer tool, perceived to be reliable, and makes users less willing to search for the errors  
7 produced by this tool [36]. They are therefore not aware that the review of computerized prescription  
8 orders requires additional effort to identify prescription errors. This is the consequence of the lack of  
9 teaching/training about this subject in French pharmacy schools. This situation contrasts strikingly with  
10 the content of the curricula taught in the United Kingdom and USA, for example [37,38].  
11  
12  
13  
14  
15  
16  
17  
18  
19

### 20 21 *5.6. Prescriber Acceptance rate*

22  
23 The rate of acceptance of PISREs by prescribers was 78.9% versus 67.6% for other PIs. This suggests  
24 that prescribers recognize the relevance of such interventions due to the potential clinical consequences  
25 of such prescription errors. This rate varies from 65.9 to 92% in studies of drug errors induced by  
26 computerized prescription [10, 14], suggesting that physicians consider the potential clinical  
27 consequences of SRE to patients to be more frequently serious than interventions unrelated to CPOE. In  
28 light of our findings, a CPOE-related prescription error is a factor that favors acceptance of the  
29 PI. These points warrant further studies.  
30  
31  
32  
33  
34  
35  
36  
37

### 38 39 *5.7. Limits*

40  
41 Our study had several limitations. First, our work is based on declarative data. These interventions are  
42 performed by hospital pharmacist and entered on Act-IP © website on a voluntary basis. There for, these  
43 PIs highlight prescription problems, but are not exhaustive. Moreover, our team annually analyzes the  
44 quantitative and qualitative evolution of the data recorded on the Act-IP © website (unpublished data).  
45 We observed that data entry can be irregular or performed with a delay. Indeed, data can be conditioned  
46 by pharmacist workload. For example, many pharmacists record prospectively their data on paper on a  
47 daily basis and thereafter register them by series on Act-IP©. Data entry can also be total on a given  
48 period and can stop during a change of assignment. We consider that these elements have consequences  
49 on the quantity of recorded data but not on their quality. However, as illustrated by publications related  
50 to other databases on information technology incidents, despite their limitations, studies based on  
51  
52  
53  
54  
55  
56  
57  
58  
59  
60

1  
2  
3 voluntary reports remain relevant to examine the nature of technology safety problems [39,40].  
4  
5 Moreover, the large sample size probably provides a relatively precise vision of the problem at the  
6  
7 national level. Second, several pharmacists analyzing the same drug prescriptions may not all track  
8  
9 down the same problems. One of major determinant of a PI is the knowledge of the pharmacist who  
10  
11 analyzes the prescription. It is this knowledge that enables him to detect a problem. Thus, a PI that is  
12  
13 considered as necessary and is not performed means that it is not recorded and will be absent from the  
14  
15 database. This happens when a doctor routinely makes a certain type of prescribing error and the  
16  
17 pharmacist fails to detect it [41]. It has been shown that, if several pharmacists analyze the same drug  
18  
19 prescriptions, they don't all track down the same problems. In a study involving 57 hospital pharmacies,  
20  
21 the mean percentage of detected prescribing errors was 59%, with a broad range of 7–88% between  
22  
23 pharmacies [42]. In the absence of specific studies to determine the performance of pharmacists in  
24  
25 detecting prescription errors induced by CPOE-system flaws and misuse, we are reduced to simply  
26  
27 assuming that such variation may be observed. In addition, there are various definitions of PISREs in  
28  
29 the literature [13-16]. This suggests that there is a certain level of subjectivity when a pharmacist  
30  
31 characterizes a PI as being related to a computer-generated prescription. Among hospitals that entered  
32  
33 the PIs on Act-IP©, 87 never qualified a PI as being a SRE. There are two possible explanations for this  
34  
35 observation. The first, and relatively unlikely, is that the software is near perfect and that there was no  
36  
37 misuse by prescribers. For example, the absence of PISREs for these hospitals could result from the  
38  
39 absence of computer-related errors due to the use of high-performance software and/or appropriately  
40  
41 trained prescribers. The second possibility is that pharmacists do not establish a link between certain  
42  
43 prescription errors and misuse of the prescription software and/or its design flaws. Conversely, a high  
44  
45 rate of PISREs for a given hospital may result from software conception flaws and/or misuse of the  
46  
47 software by prescribers and pharmacists who are very aware of the role of CPOE-systems in generating  
48  
49 prescription errors. Regardless of the considered scenario, it is important to remember that differences  
50  
51 in PISRE rates may also be due to the quality of the training provided. Studies have shown that  
52  
53 insufficient training on an ePrescribing system can contribute to errors [43,44]. Tolley illustrated how  
54  
55 pharmacists did not receive any formal training about the system after starting at a hospital trust and  
56  
57 observed that no formal training was offered when pharmacists changed roles. It has been shown that  
58  
59  
60

1  
2  
3 training plays a role in the users' experience but there is a lack of published research in this area [34].

4  
5 Thus, further research is warranted to lift the veil on these unknowns.

6  
7  
8 Our results highlight that prescribing problems related to computer software are common in France.

9  
10 This is a concern that affects most (if not all) CPOE systems currently being used and therefore all  
11 hospitals, to varying degrees. Identifying the most dangerous software appears to be a priority to  
12 improve the quality and safety of patient care.  
13  
14  
15

## 16 17 **6. Conclusion**

18  
19 Computer-related prescribing errors are common, with wrong dose being the most frequent type of error.

20  
21 Such errors concern all drug classes and have potentially serious adverse clinical consequences if they  
22 are not intercepted by pharmacists when performing their daily medication review. The message appears  
23 to be well received by prescribers who agree to change their prescription more frequently than for PIs  
24 not related to CPOE use. CPOE medication review requires additional pharmacist diligence to catch  
25 such errors. As the PISRE ratio is significantly lower for certified software, patient safety agencies  
26 should undertake studies to identify the safest software so as to discard software that is potentially  
27 dangerous.  
28  
29  
30  
31  
32  
33  
34  
35  
36  
37  
38  
39  
40  
41  
42  
43  
44  
45  
46  
47  
48  
49  
50  
51  
52  
53  
54  
55  
56  
57  
58  
59  
60

### Author contributions

Manon Videau and Bruno Charpiat designed the study, performed the statistical analyses, interpreted the results, and wrote the first version of the manuscript. Céline Vermorel contributed to the design of the study, performed the statistical analyses, and revised the manuscript. Jean-Luc Bosson contributed to the design of the study and revised the manuscript. Ornella Conort contributed substantially to the interpretation of the data and contributed to the revision of the manuscript. Pierrick Bedouch designed the study, performed the statistical analyses, interpreted the results, and revised the manuscript.

### Acknowledgements

The authors would like to thank the team of THEMAS and VIP working group for assistance in this project. We thank the clinical pharmacists of the SFPC Act-IP© group who participated in the data collection.

Members of the working group “Valorization of Pharmaceutical Interventions/ Valorisation des Interventions Pharmaceutiques – Act-IP©” of the French Society for Clinical Pharmacy: Pierrick Bedouch (Grenoble), Magalie Bourdelin (Villefranche-sur-Saone), Bruno Charpiat (Lyon), Ornella Conort (Paris), Julien Gravoulet (Leyr), Audrey Janoly-Dumenil (Lyon), Michel Juste (Epernay), and Céline Mongaret (Reims).

Clinical pharmacists of the SFPC Act-IP© group who participated in the data collection: S. Abkhtaoui-Couriat (Corbie), B. Allard-Latour (Saint-Genis-Laval), C. Andrieu (Saint-Etienne), X. Armoiry (Lyon), E. Armoiry (Villeurbanne), D. Attivi (Neufchâteau), L. Audibert (Alix), A. Barbet (Amiens), M. Bascoulergue (Aulnay sous bois), C. Basselin (Saint-Genis-Laval), F. Baud (Paris), P. Bedouch (Grenoble), M. Belhout (Amiens), S. Benhaoua (Saint Denis), J. Beny (Alix), S. Berthet (Lyon), J. Berthou (Besancon), D. Bichard (Besancon), A.C. Blandin (Besancon), E. Blondel (Aix les Bains), S. Bonn Loue (Luneville), A. Bonvin (Lyon), F. Bouchand (Garches), P. Bouniot (Francheville), M. Bourdelin (Besancon), C. Bouret (Lyon), L. Bourguignon (Lyon), C. Bourne (Saint-Egrève), M. Bouteille (Lyon), J. Burdin (Lyon), C. Bureau (Alix), C. Bureau (Villeurbanne), M. Burgin (Luneville), M. Buyse (Paris), E. Cabaret (Hyerres), D. Cabelguenne (Pierre Benite), C. Capele (Saint André lez Lille), D. Carli (Vienne), I. Carpentier (Saint-Genis-Laval), E. Chambrey (Rang-du-Fliers), S. Chantel (Pierre Benite), N. Charhon (Vienne), B. Charpiat (Lyon), M. Chaumont (Le Chesnay), K. Civiletti (Martigues), B. Clerc (Besancon), M. Cleve (Vienne), R. Colomb (Saint-Etienne), C. Combe (Saint-Etienne), O. Conort (Paris), R. Contreras (Besancon), S. Crepin (Limoges), M. Creusat-Aube (Illkirch-Graffenstaden), A. Cuoq (Lyon), C. Decourcelle (Lomme), T. Delanoy (Vienne), C. Derharoutunian (Vienne), A. Deronze (Lyon); M. Desseignet (Lyon), S. Diallo (Le Chesnay), L. Dietrich (Strasbourg), A. Dory (Strasbourg), J. Dos-Reis (Paris), N. Duarte (Draveil), M.O. Duzanski (Strasbourg), L. Escofier (Mayenne), F. Fabre (Clermont-Ferrand), S.

1  
2  
3 Fare (Paris), J. Fillon (Paris), A. Fonteneau (Amiens), A. Fouquet (Vienne); A. Gadot (Lyon), H.  
4 Galtier (Vienne); I. Garreau (Epernay), C. Gerard (Francheville), R. Gervais (Saint Denis), O. Gloulou  
5 (Saint Denis), I. GraguebChatti (Vienne), A. Grass (Lyon), I. Gremeau (Clermont-Ferrand), P.Y.  
6 Grosse (Grasse), C. Guenaire (Rennes), F. Guerin (Aix les Bains), A. Guillermet (Lyon), S. Hannou  
7 (Illkirch-Graffenstaden), A. Henry (Lyon), G. Herbin (Bayeaux), N. Herment (Epernay), A.  
8 JanolyDumenil (Pierre Benite), C. Jarre (Vienne), L. Jovenaux (Martigues), M. Juste (Epernay), A.S.  
9 Kaczmarek (Clermont-Ferrand), W. KiniMatondo (Saint Denis), H. Labrosse (Lyon), C. Laillier  
10 (Strasbourg), E. Lamarre (Saint-Etienne), J. Lamoureux (Lyon), M. Laurent (Lyon), A. Le Bris (Le  
11 Chesnay), M. Le Duff (Rennes), R. Lecointre (Saint-Etienne), J. Lecompte (Grasse), M. Lefebvre  
12 (Lyon), A.L. Lepetit (Epernay), H. Lepont-Gilardi (Rennes), A. Lescoat (Villeurbanne), J.P. Levillain  
13 (Migennes), G. Liguori (Clermont-Ferrand), C. Lohier (Villeurbanne), C. Lupo (Lyon), J. Machon  
14 (Lyon), K. Maes (Vienne), G. Magerand (Villeurbanne), K. Mangerel (Epernay), S. Martelet (Saint-  
15 Etienne), D. Matanza (Francheville), V. Mermet (Saint-Genis-Laval), C. Mouchoux (Villeurbanne), Y.  
16 Nivoix (Strasbourg), A. Orly (Paris), E. Orng (Lyon), A. Oufella (Aulnay Sous Bois), I. Paillole  
17 (Toulouse), D. Pallot (Saint Denis), A. Papon (Lyon), L. Parnet (Paris), M. Paysant (Saint-Genis-  
18 Laval), E. Perrier-Cornet (Illkirch-Graffenstaden), S. Perrin (Besancon), D. Peynaud (Lyon), B.N.  
19 Pham (Vienne), D. Piney (Luneville), A. Pohyer (Montpellier), C. Porot (Besancon), J. Pouzoulet  
20 (Créteil), L. Poy (Lyon), E. Prevost (Epernay), E. Prunier (Besancon), F. Ranchon (Lyon), M. Rave  
21 (Besancon), C. Remonnay (Besancon), M. Remy (Ho-Chi-Minh Ville), M. Rhalimi (Chaumont-en-  
22 Vexin), C. Rioufol (Pierre Benite), A. Robelet (Paris), S. Roche (Epernay), F.X. Rose (Saint-Avé), R.  
23 Roubille (Vienne), A. Sambarino (Bourgoin Jallieu), D. Sankhare (Saint Denis), R. Santucci  
24 (Strasbourg), J. Scholler (Strasbourg), R. Selmi (Saint Denis), C. Stamm (Pierre Benite), C. Tanguy  
25 (Brest), D. Tessier (Saint Denis), H. Thery (Rang-du-Fliers), N. Thiriat (Paris), C. Turci (Saint-Genis-  
26 Laval), N. Vantard (Lyon), N. Vauvarin (Joigny), S. Vernardet (Annonay), D. Viard (Besancon), C.  
27 Vignand (Lyon), C. Villa (Vienne), P. Vonna (Epernay), S. Wacker (Strasbourg), N. Wereszczynski  
28 (Grasse), and L. Zerhouni (Paris).

29  
30  
31  
32  
33  
34  
35  
36  
37  
38  
39  
40  
41  
42  
43  
44  
45 We thank Kévin Mastrotillo, technical consultant of the Act-IP© observatory, for his contribution to the  
46 data extraction and data management.

#### 47 48 49 **Funding statement**

50 This research received no specific grant from any funding agency in the public, commercial, or not-for-  
51 profit sectors.

52  
53  
54 This study was supported by The French Society of Clinical Pharmacy, a nonprofit and independent  
55 foundation for clinical pharmacy research and development.

#### 56 57 58 **Statement on conflicts of interest**

59 The authors declare that they have no conflicts of interest.



1  
2  
3 **Patient consent for publication**

4 Not required  
5

6  
7 **Ethical approval**

8 Ethical approval for the study was obtained on February 19, 2020 (CECIC Rhône-Alpes-Auvergne,  
9 Clermont-Ferrand, IRB 5891).  
10  
11

12  
13 **Data availability**

14 Deidentified participant data are available upon reasonable request to Act-IP© Administrator (email  
15 address: [actip@sfdc.eu](mailto:actip@sfdc.eu)).  
16  
17  
18  
19  
20  
21  
22  
23  
24  
25  
26  
27  
28  
29  
30  
31  
32  
33  
34  
35  
36  
37  
38  
39  
40  
41  
42  
43  
44  
45  
46  
47  
48  
49  
50  
51  
52  
53  
54  
55  
56  
57  
58  
59  
60

For peer review only



1  
2  
3 **Summary table**  
4

5 Table 1. Characteristics of Act-IP© observatory PISREs and PIs between 2014 to 2018.  
6  
7  
8  
9  
10  
11  
12  
13  
14  
15  
16  
17  
18  
19  
20  
21  
22  
23  
24  
25  
26  
27  
28  
29  
30  
31  
32  
33  
34  
35  
36  
37  
38  
39  
40  
41  
42  
43  
44  
45  
46  
47  
48  
49  
50  
51  
52  
53  
54  
55  
56  
57  
58  
59  
60

For peer review only

1  
2  
3 **Summary Figures**  
4

5 Figure 1. Flowchart, PISRE selection in Act-IP© observatory (extraction on 11th February 2019)  
6

7  
8 Figure 2. Geographical location of French hospitals that entered data into the Act-IP © observatory  
9 between 2014 and 2018  
10  
11  
12  
13  
14  
15  
16  
17  
18  
19  
20  
21  
22  
23  
24  
25  
26  
27  
28  
29  
30  
31  
32  
33  
34  
35  
36  
37  
38  
39  
40  
41  
42  
43  
44  
45  
46  
47  
48  
49  
50  
51  
52  
53  
54  
55  
56  
57  
58  
59  
60

For peer review only

Table 1. Characteristics of all Act-IP© observatory PISREs and PIs between 2014 to 2018.

| Characteristics                                   | PISRE        | PI total      | ratio |          |
|---------------------------------------------------|--------------|---------------|-------|----------|
|                                                   | (N = 27,058) | (N = 331,678) | %     | p-value  |
| <b>Drug related problem</b>                       |              |               |       |          |
| Supratherapeutic dosage                           | 7,436        | 72,912        | 10.2  | < 0.001  |
| Non-conformity with guidelines/hospital formulary | 6,069        | 86,072        | 7.1   | -        |
| Improper administration                           | 4,838        | 49,184        | 9.8   | < 0.001  |
| Subtherapeutic dosage                             | 4,646        | 29,105        | 16.0  | < 0.001  |
| Untreated indication                              | 2,366        | 30,138        | 7.9   | < 0.001  |
| Drug without indication                           | 1,302        | 27,690        | 4.7   | < 0.001  |
| Drug interaction                                  | 161          | 18,267        | 0.9   | < 0.001  |
| Drug monitoring                                   | 111          | 10,303        | 1.1   | < 0.001  |
| Adverse drug reaction                             | 65           | 5,854         | 1.1   | < 0.001  |
| Failure to receive drug                           | 64           | 2,153         | 3.0   | < 0.001  |
| <b>Type of intervention</b>                       |              |               |       |          |
| Dose adjustment                                   | 7,447        | 89,390        | 8.3   | -        |
| Drug switch                                       | 6,649        | 85,033        | 7.8   | < 0.001  |
| Drug discontinuation                              | 5,220        | 62,715        | 8.3   | < 0.001  |
| Optimization of administration                    | 4,123        | 32,558        | 12.7  | < 0.001  |
| Addition of new drug                              | 3,228        | 34,198        | 9.4   | < 0.001  |
| Change of administration route                    | 213          | 6,978         | 3.1   | < 0.001  |
| Drug monitoring                                   | 178          | 20,806        | 0.9   | < 0.001  |
| <b>Prescriber Acceptance</b>                      |              |               |       |          |
| Interventions accepted                            | 21,356       | 227,223       | 9.4   | < 0.001* |

|                            |        |         |      |         |
|----------------------------|--------|---------|------|---------|
| Interventions not accepted | 3,068  | 51,957  | 5.9  |         |
| Not assessable             | 2,634  | 52,498  | 5.0  |         |
| Prescriber's status        |        |         |      |         |
| Senior                     | 15,152 | 180,863 | 8.4  | < 0.001 |
| Resident                   | 11,765 | 150,136 | 7.8  |         |
| Midwife**                  | 141    | 679     | 20.8 |         |
| Pharmacist's status        |        |         |      |         |
| Senior                     | 21,271 | 231,519 | 9.2  | < 0.001 |
| Resident                   | 4,640  | 86,728  | 5.4  |         |
| Not assessable**           | 1,147  | 13,431  | 8.5  |         |
| CPOE system status         |        |         |      |         |
| Not certified              | 21,385 | 226,878 | 9.4  | < 0.001 |
| Certified                  | 5,549  | 101,516 | 5.5  |         |
| Not assessable**           | 124    | 3,284   | 3.8  |         |
| Total                      | 27,058 | 331,678 | 8.2  |         |

*PI: pharmacist's intervention, PISRE: pharmacist's intervention identified as due to a system-related error, ratio = PISRE / PI Total, CPOE: computerized prescriber order entry*

*\*Not accepted and not assessable interventions have been regrouped for chi-square test; \*\*excluded from the chi-square analysis*

## References

1. Lewis PJ, Dornan T, Taylor D, Tully MP, Wass V, Ashcroft DM. Prevalence, incidence and nature of prescribing errors in hospital inpatients: a systematic review. *Drug Saf.* 2009;32(5):379-89.
2. Ashcroft DM, Lewis PJ, Tully MP, Farragher TM, Taylor D, Wass V, et al. Prevalence, Nature, Severity and Risk Factors for Prescribing Errors in Hospital Inpatients: Prospective Study in 20 UK Hospitals. *Drug Saf.* 2015;38(9):833-43.
3. Vélez-Díaz-Pallarés M, Álvarez Díaz AM, Gramage Caro T, Vicente Oliveros N, Delgado-Silveira E, Muñoz García M, Cruz-Jentoft AJ, Bermejo-Vicedo T. Technology-induced errors associated with computerized provider order entry software for older patients. *Int. J. Clin. Pharm.* 2017;39(4):729-742.
4. Radley DC, Wasserman MR, Olsho LE, Shoemaker SJ, Spranca MD, Bradshaw B. Reduction in medication errors in hospitals due to adoption of computerized provider order entry systems. *J. Am. Med. Inform. Assoc.* 2013;20(3):470-6.
5. Nuckols TK, Smith-Spangler C, Morton SC, Asch SM, Patel VM, Anderson LJ, et al. The effectiveness of computerized order entry at reducing preventable adverse drug events and medication errors in hospital settings: a systematic review and meta-analysis. *Syst. Rev.* 2014;3(56). <https://doi.org/10.1186/2046-4053-3-56>.
6. Koppel R, Metlay JP, Cohen A, Abaluck B, Localio AR, Kimmel SE, et al. Role of Computerized Physician Order Entry Systems in Facilitating Medication Errors. *JAMA.* 2005;293(10):1197-203.
7. Brown CL, Mulcaster HL, Triffitt KL, Sittig DF, Ash JS, Reygate K, et al. A systematic review of the types and causes of prescribing errors generated from using computerized provider order entry systems in primary and secondary care. *J. Am. Med. Inform. Assoc.* 2017;24(2):432-40.
8. Horsky J, Kuperman GJ, Patel VL. Comprehensive analysis of a medication dosing error related to CPOE. *J. Am. Med. Inform. Assoc.* 2005;12(4):377-82.
9. Prescrire Editorial Staff. Electronic prescribing: the risk of errors and adverse effects. *Prescrire Int.* 2016;25(167):24-7.
10. Vialle V, Tiphine T, Poirier Y, Raingeard E, Feldman D, Freville J-C. [To know, understand and combating medication errors related to computerized physician order entry]. *Ann. Pharm. Fr.* 2011;69(3):165-76.
11. Direction Générale de l'offre de Soins [Internet]. [2018 HIS Atlas. State of the art of hospital information systems][updated 2018 May 15; cited 2019 Nov 9]. Available from: [https://solidarites-sante.gouv.fr/IMG/pdf/dgos\\_atlas\\_sih\\_2018.pdf](https://solidarites-sante.gouv.fr/IMG/pdf/dgos_atlas_sih_2018.pdf)
12. Westbrook JI, Reckmann M, Li L, Runciman WB, Burke R, Lo C, Baysari MT, Braithwaite J, Day RO. Effects of two commercial electronic prescribing systems on prescribing error rates in hospital in-patients: a before and after study. *PLoS Med.* 2012 Jan;9(1):e1001164.
13. Bouchand F, Thomas A, Zerhouni L, Dauphin A, Conort O. (Pharmaceutical interventions before and after computerization of the prescription in an internal medicine department] *Presse Médicale.* 2007 Mar 1;36(3, Part 1):410-8.

14. Hellot-Guersing M, Jarre C, Molina C, Leromain A-S, Derharoutunian C, Gadot A, et al. [Medication errors related to computerized physician order entry at the hospital: Record and analysis over a period of 4 years]. *Ann Pharm Fr.* 2016 Jan;74(1):61-70.
15. Westbrook JI, Baysari MT, Li L, Burke R, Richardson KL, Day RO. The safety of electronic prescribing: manifestations, mechanisms, and rates of system-related errors associated with two commercial systems in hospitals. *J Am Med Inform Assoc JAMIA.* 2013;20(6):1159-67.
16. Sittig DF, Ash JS, Zhang J, Osheroff JA, Shabot MM. Lessons from « Unexpected increased mortality after implementation of a commercially sold computerized physician order entry system ». *Pediatrics.* 2006;118(2):797-801.
17. Charpiat B, Bedouch P, Conort O, Rose FX, Juste M, Roubille R, Allenet B. Opportunities for medication errors and pharmacist's interventions in the context of computerized prescription order entry: a review of data published by French hospital pharmacists]. *Ann Pharm Fr.* 2012 Mar;70(2):62-74. doi: 10.1016/j.pharma.2012.02.002.
18. Ranji SR, Rennke S, Wachter RM. Computerised provider order entry combined with clinical decision support systems to improve medication safety: a narrative review. *BMJ Qual Saf.* 2014 Sep;23(9):773-80. doi: 10.1136/bmjqs-2013-002165.
19. Korb-Savoldelli V, Boussadi A, Durieux P, Sabatier B. Prevalence of computerized physician order entry systems-related medication prescription errors: A systematic review. *Int J Med Inform.* 2018 Mar;111:112-122. doi: 10.1016/j.ijmedinf.2017.12.022.
20. Allenet B, Bedouch P, Rose F-X, Escofier L, Roubille R, Charpiat B, et al. Validation of an instrument for the documentation of clinical pharmacists' interventions. *Pharm World Sci.* 2006 Aug;28(4):181-8.
21. Standardisation et Valorisation des Activités de Pharmacie Clinique – Descriptif [Internet]. Act-IP. [cited 2010 Apr 1]. Available from: <http://www.actip.sfpc.eu/actip/index/ficheip/>
22. Bedouch P, Sylvoz N, Charpiat B, Juste M, Roubille R, Rose FX, Bosson JL, Conort O, Allenet B; French Society of Clinical Pharmacy's Act-IP© Group. Trends in pharmacists' medication order review in French hospitals from 2006 to 2009: analysis of pharmacists' interventions from the Act-IP© website observatory. *J Clin Pharm Ther.* 2015 Feb;40(1):32-40.
23. Haute Autorité de Santé[internet]. Logiciels d'Aide à la Prescription hospitaliers. [updated 2019 Oct 7; cited 2019 Nov 9]. Available from: [https://www.has-sante.fr/jcms/c\\_1751516/fr/logiciels-d-aide-a-la-prescription-hospitaliers](https://www.has-sante.fr/jcms/c_1751516/fr/logiciels-d-aide-a-la-prescription-hospitaliers)
24. Van der Sijs H, Aarts J, Vulto A, Berg M. Overriding of drug safety alerts in computerized physician order entry. *J Am Med Inform Assoc.* 2006 Mar-Apr;13(2):138-47
25. Wetterneck TB, Walker JM, Blosky MA, Cartmill RS, Hoonakker P, Johnson MA, Norfolk E, Carayon P. Factors contributing to an increase in duplicate medication order errors after CPOE implementation. *J Am Med Inform Assoc.* 2011 Nov-Dec;18(6):774-82.
26. Marcilly R, Ammenwerth E, Vasseur F, Roehrer E, Beuscart-Zéphir MC. Usability flaws of medication-related alerting functions: A systematic qualitative review. *J Biomed Inform.* 2015 Jun;55:260-71. doi: 10.1016/j.jbi.2015.03.006.

- 1
- 2
- 3 27. Haute Autorité de Santé[internet]. Référentiel de certification des logiciels hospitaliers par essai
- 4 de type. [updated 2012 Jun 5; cited 2019 Oct 6]. Available from: [https://www.has-](https://www.has-sante.fr/upload/docs/application/pdf/2012-06/referentiel_certification_lap_hospitalier_juin12.pdf)
- 5 [sante.fr/upload/docs/application/pdf/2012-06/referentiel\\_certification\\_lap\\_hospitalier\\_juin12.pdf](https://www.has-sante.fr/upload/docs/application/pdf/2012-06/referentiel_certification_lap_hospitalier_juin12.pdf)
- 6
- 7 28. Prescrire rédaction. Prescription informatisée : un outil encore expérimental, trop peu régulé.
- 8 *Rev Prescrire*. 2015;35(386):938-9.
- 9
- 10 29. Nanji KC, Rothschild JM, Salzberg C, Keohane CA, Zigmont K, Devita J, et al. Errors
- 11 associated with outpatient computerized prescribing systems. *J Am Med Inform Assoc JAMIA*.
- 12 2011 Dec;18(6):767-73.
- 13
- 14 30. Holmgren AJ, Adler-Milstein J, McCullough J. Are all certified EHRs created equal? Assessing
- 15 the relationship between EHR vendor and hospital meaningful use performance. *J Am Med*
- 16 *Inform Assoc*. 2018 Jun 1;25(6):654-660.
- 17
- 18 31. Ratwani RM, Fairbanks RJ, Hettinger AZ, Benda NC. Electronic health record usability:
- 19 analysis of the user-centered design processes of eleven electronic health record vendors. *J Am*
- 20 *Med Inform Assoc*. 2015 Nov;22(6):1179-82
- 21
- 22 32. Jaensch SL, Baysari MT, Day RO, Westbrook JI. Junior doctors' prescribing work after-hours
- 23 and the impact of computerized decision support. *Int J Med Inform*. 2013 Oct;10(82):980-6.
- 24
- 25 33. Nerich V., Limas S., Demarchi M., Borg C, Rohrlich PS, Deconinck E. Computerized physician
- 26 order entry of injectable antineoplastic drugs: an epidemiologic study of prescribing medication
- 27 errors. *Int J Med Inform*. 2010 Oct; 79(10) :699-706.
- 28
- 29 34. Tolley CL. (2018) An investigation of healthcare professionals' experiences of training and using
- 30 electronic prescribing systems: four literature reviews and two qualitative studies undertaken in
- 31 the UK hospital context, Durham theses, Durham University. Available at Durham E-Theses
- 32 Online: <http://etheses.dur.ac.uk/12845/>
- 33
- 34 35. Tully M, Buchan I. Prescribing errors during hospital inpatient care: factors influencing
- 35 identification by pharmacists. *Pharm World Sci*. 2009;31(6):682-8.
- 36
- 37 36. Charpiat B, Derfoufi S, Larger M, Janoly-Dumenil A, Mouchoux C, Allenet B, et al.
- 38 [Identification of knowledge deficits of pharmacy students at the beginning of the fifth year of
- 39 pharmacy practice experience: Proposals to change the content of academic programs]. *Ann*
- 40 *Pharm Fr*. 2016 Sept;74(5):404-12
- 41
- 42 37. Pontefract SK, Wilson K. Using electronic patient records: defining learning outcomes for
- 43 undergraduate education. *BMC Med Educ*. 2019 Jan;19(1):30.
- 44
- 45 38. Accreditation Council of Pharmacy Education[internet]. Accreditation standards and key
- 46 elements for the professional program in pharmacy leading to the doctor of pharmacy degree.
- 47 Standards 2016. [cited 2019 Oct 13]. Available from: [https://www.acpe-](https://www.acpe-accredit.org/pdf/Standards2016FINAL.pdf)
- 48 [accredit.org/pdf/Standards2016FINAL.pdf](https://www.acpe-accredit.org/pdf/Standards2016FINAL.pdf).
- 49
- 50 39. Magrabi F, Ong MS, Runciman W, Coiera E. Patient safety problems associated with healthcare
- 51 information technology: an analysis of adverse events reported to the US Food and Drug
- 52 Administration. *AMIA Annu Symp Proc*. 2011;2011:853-7.
- 53
- 54 40. Magrabi F, Ong MS, Runciman W, Coiera E. Using FDA reports to inform a classification for
- 55 health information technology safety problems. *J Am Med Inform Assoc*. 2012 Jan-
- 56 Feb;19(1):45-53.
- 57
- 58
- 59
- 60

- 1  
2  
3 41. Charpiat B, Bedouch P, Tod M, Allenet B. Classifying pharmacists' interventions recorded in  
4 observational databases: Are they all necessary and appropriate? *Res Social Adm Pharm*. 2017  
5 Nov;13(6):1184-1185.  
6  
7 42. Beex-Oosterhuis MM, de Vogel EM, van der Sijs H, Dieleman HG, van den Bemt PM.  
8 Detection and correct handling of prescribing errors in Dutch hospital pharmacies using test  
9 patients. *Int J Clin Pharm* 2013;35:1188-1202.  
10  
11 43. Schiff, G.D., Amato, M.G., Egualé, T., et al., Computerised physician order entry related  
12 medication errors: analysis of reported errors and vulnerability testing of current systems. *BMJ*  
13 *Qual Saf*, 2015;24(4):264-71.  
14  
15 44. Condren, M., Honey, B.L., Carter, S.M., et al., Influence of a systems-based approach to  
16 prescribing errors in a pediatric resident clinic. *Acad Pediatr*, 2014;14(5):485-90.  
17  
18  
19  
20  
21  
22  
23  
24  
25  
26  
27  
28  
29  
30  
31  
32  
33  
34  
35  
36  
37  
38  
39  
40  
41  
42  
43  
44  
45  
46  
47  
48  
49  
50  
51  
52  
53  
54  
55  
56  
57  
58  
59  
60



Figure 1. Flowchart, pharmacist interventions system-related errors (PISRE) selection in Act-IP© observatory (extraction on 11<sup>th</sup> February 2019)

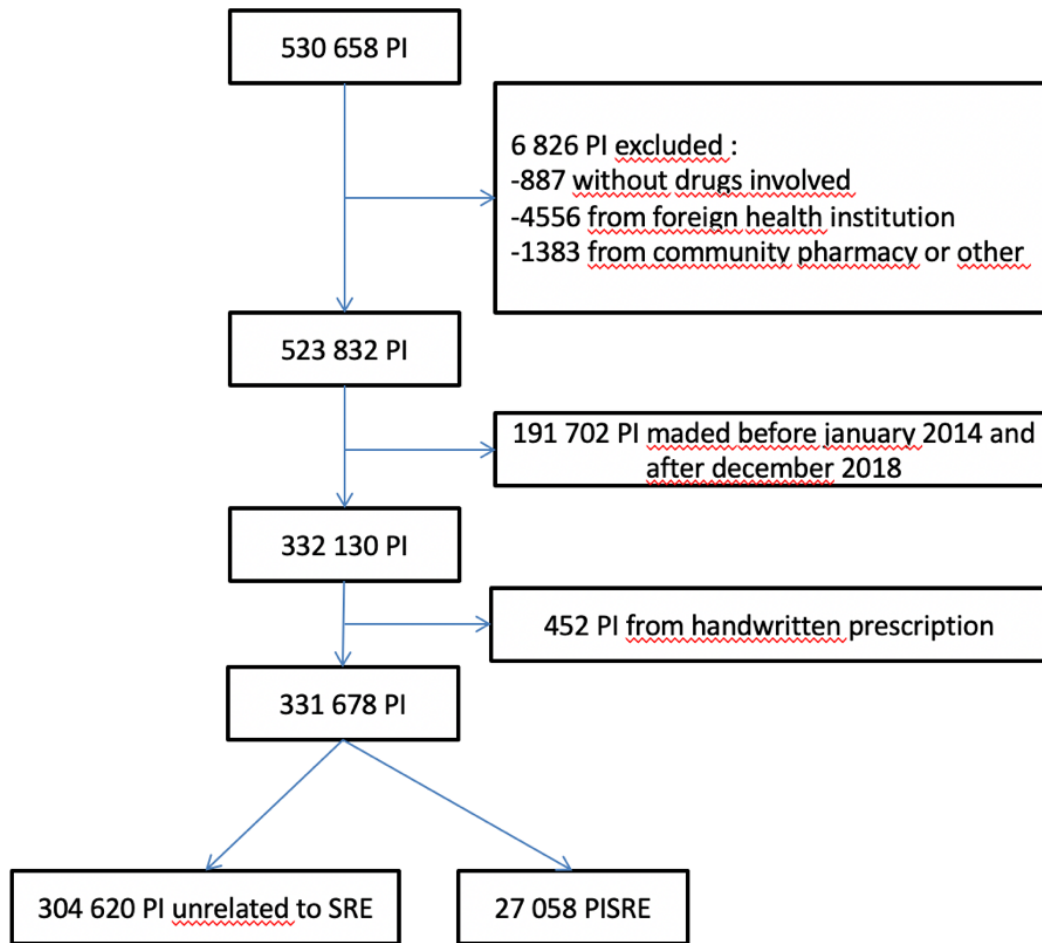

only

Figure 2. Geographical location of French hospitals that entered data into the Act-IP © observatory between 2014 and 2018

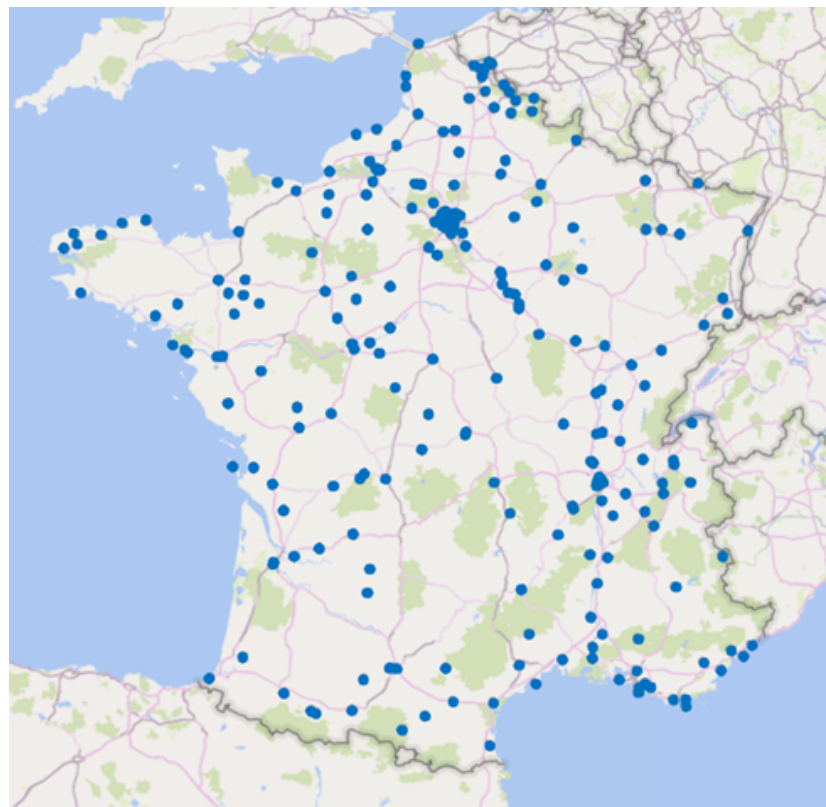

Review only

## Appendix 1. The Pharmacist intervention form

**PHARMACIST INTERVENTION FORM**

📅 **DATE:** / / 📁 **INTERVENTION N°:** 🏠 **CENTER N°:**

**PATIENT:**

Last name:

First name:

Age:        years / Weight:    Kg

Sex:  M         F**Hospital ward:**

- Psychiatry  
 Acute care  
 Long term care  
 Rehabilitation ward

**1- DRUG RELATED PROBLEM (1 choice):**

- 1  Non conformity to guidelines or contra-indication  
2  Untreated indication  
3  Subtherapeutic dosage  
4  Supratherapeutic dosage  
5  Drug without indication  
6  Drug interaction  
     To be taken into account  
     Use with caution  
     Combination to be avoided  
     Combination contra-indicated  
     Documented but not in VIDAL®  
7  Adverse drug reaction  
8  Improper administration  
9  Failure to receive drug  
10  Drug monitoring

**2- INTERVENTION (1 choice):**

- 1  Addition of a new drug  
2  Drug discontinuation  
3  Drug switch  
4  Change of administration route  
5  Drug monitoring  
6  Administration modalities optimisation  
7  Dose adjustment

**DRUG NAME (INN):****3- DRUG CLASSIFICATION (ATC):**

- A Alimentary tract & metabolism  
 B Blood & blood forming organs  
 C Cardiovascular system  
 D Dermatological  
 G Genito urinary system & sex hormones  
 H Systemic hormonal preparations  
 J Anti-infective for systemic use  
 L Anti-neoplastic & immunomodulating agents  
 M Musculo-skeletal system  
 N Nervous system  
 P Antiparasitic products  
 R Respiratory system  
 S Sensory organs  
 V Various

**4- INTERVENTION FOLLOW-UP:**

- Accepted  
 Non accepted  
 Non assessable

**DETAILS** ⇒ If necessary, give details on any aspects of the detected DRP and describe the intervention, precisely

**Context****Problem****Intervention**

## Appendix 2. Examples of PISRE and drug by drug-related problems (N = 27,822)

| Drug-related problem                          | Number of drugs involved – n (%) | Most frequent drug ( <b>international nonproprietary names</b> ) (n)                                             | Examples                                                                                                          |
|-----------------------------------------------|----------------------------------|------------------------------------------------------------------------------------------------------------------|-------------------------------------------------------------------------------------------------------------------|
| Supratherapeutic dosage                       | 7,571 (27.2)                     | Paracetamol (1,043), tramadol (223), pantoprazole (212), enoxaparin (204)                                        | “Duplicate prescription: 1 in predefined protocol and 1 outside predefined protocol = 8 g of paracetamol per day” |
| Non-conformity to guidelines/contraindication | 6,212 (22.3)                     | Alfuzosin (515), dutasteride (493), silodosin (469), paracetamol (460), tamsulosin (373)                         | “prescription of dutasteride, which is not in the hospital drug formulary, with a risk of treatment omission”     |
| Improper administration                       | 4,972 (17.9)                     | Paracetamol (277), levothyroxine (130), pregabalin (130), methylprednisolone (124)                               | “selection of IV terbutaline for administration by aerosol”                                                       |
| Subtherapeutic dosage                         | 4,738 (17.0)                     | Enoxaparin (965), heparin (450), tinzaparin (186), paracetamol (140), macrogol (105),                            | “Enoxaparin 4000 UI/0.4 ml prescription: 1 IU instead of 1 syringe”                                               |
| Untreated indication                          | 2,441 (8.8)                      | acetylsalicylic acid (82), pregabalin (80), paracetamol (74), tinzaparin (69), bisoprolol (69), enoxaparin (68), | “prescription of pregabalin not renewed (hospital stay longer than the duration of the prescription)”             |

|                                                                                                                                              |                         |             |                                                                                                                           |                                                                                                                                                                                 |
|----------------------------------------------------------------------------------------------------------------------------------------------|-------------------------|-------------|---------------------------------------------------------------------------------------------------------------------------|---------------------------------------------------------------------------------------------------------------------------------------------------------------------------------|
| 1<br>2<br>3<br>4<br>5<br>6<br>7<br>8<br>9<br>10<br>11<br>12<br>13<br>14<br>15                                                                | Drug without indication | 1,340 (4.8) | Pantoprazole (66), amoxicillin and beta-lactamase inhibitor (44), cholecalciferol (40), ceftriaxone (34), enoxaparin (30) | “duplicate prescription of pantoprazole per os and IV by two prescribers”                                                                                                       |
| 16<br>17<br>18<br>19<br>20<br>21<br>22<br>23<br>24<br>25<br>26<br>27<br>28<br>29<br>30<br>31<br>32<br>33<br>34<br>35<br>36                   | Drug interaction        | 262 (0.9)   | Amiodarone (27), fluindione (9), levothyroxine (9)                                                                        | “cordarone and escitalopram combination contra-indicated: risk of “torsade de pointes” not modified during drug interaction alert with Clinical Decision Support System (CDSS)” |
| 37<br>38<br>39<br>40<br>41<br>42<br>43<br>44<br>45<br>46<br>47<br>48<br>49<br>50<br>51<br>52<br>53<br>54<br>55<br>56<br>57<br>58<br>59<br>60 | Drug monitoring         | 124 (0.4)   | Fluindione (25), polystyrene sulfonate (8), paracetamol (4)                                                               |                                                                                                                                                                                 |
|                                                                                                                                              | Adverse drug reaction   | 70 (0.3)    | Polystyrene sulfonate (11), furosemide (6), atorvastatin (4), tramadol (3), macrogol (3)                                  | “increased risk of adverse reactions by the combination of atorvastatin and fenofibrate”                                                                                        |
|                                                                                                                                              | Failure to receive drug | 92 (0.3)    | Esomeprazole (3), cholecalciferol (3), acetylsalicylic acid (3), furosemide (3)                                           | “Prescription of furosemide not appearing on the nursing plan”                                                                                                                  |

1  
2  
3  
4  
5  
6  
7  
8  
9  
10  
11  
12  
13  
14  
15  
16  
17  
18  
19  
20  
21  
22  
23  
24  
25  
26  
27  
28  
29  
30  
31  
32  
33  
34  
35  
36  
37  
38  
39  
40  
41  
42  
43  
44  
45  
46  
47  
48  
49  
50  
51  
52  
53  
54  
55  
56  
57  
58  
59  
60STROBE Statement—Checklist of items that should be included in reports of *cross-sectional studies*

|                           | Item No | Recommendation                                                                                                                                                                       | Main Document                                                            |
|---------------------------|---------|--------------------------------------------------------------------------------------------------------------------------------------------------------------------------------------|--------------------------------------------------------------------------|
| <b>Title and abstract</b> | 1       | (a) Indicate the study's design with a commonly used term in the title or the abstract                                                                                               | Page 1 – Title                                                           |
|                           |         | (b) Provide in the abstract an informative and balanced summary of what was done and what was found                                                                                  | Pages 2-3                                                                |
| <b>Introduction</b>       |         |                                                                                                                                                                                      |                                                                          |
| Background/rationale      | 2       | Explain the scientific background and rationale for the investigation being reported                                                                                                 | Page 5                                                                   |
| Objectives                | 3       | State specific objectives, including any prespecified hypotheses                                                                                                                     | Page 6 – lines 35-37                                                     |
| <b>Methods</b>            |         |                                                                                                                                                                                      |                                                                          |
| Study design              | 4       | Present key elements of study design early in the paper                                                                                                                              | Page 6 – lines 40-42                                                     |
| Setting                   | 5       | Describe the setting, locations, and relevant dates, including periods of recruitment, exposure, follow-up, and data collection                                                      | Page 6 – lines 46-50                                                     |
| Participants              | 6       | (a) Give the eligibility criteria, and the sources and methods of selection of participants                                                                                          | Pages 6 – lines 46-50                                                    |
| Variables                 | 7       | Clearly define all outcomes, exposures, predictors, potential confounders, and effect modifiers. Give diagnostic criteria, if applicable                                             | Page 5 – lines 20-23<br>Page 6 – lines 41-42<br>Page 6-7 – lines 50 - 65 |
|                           |         |                                                                                                                                                                                      |                                                                          |
|                           |         |                                                                                                                                                                                      |                                                                          |
| Data sources/measurement  | 8*      | For each variable of interest, give sources of data and details of methods of assessment (measurement). Describe comparability of assessment methods if there is more than one group | Page 6 – lines 46 – 52<br>Page 7 – lines 53- 65                          |
| Bias                      | 9       | Describe any efforts to address potential sources of bias                                                                                                                            | Not applicable                                                           |
| Study size                | 10      | Explain how the study size was arrived at                                                                                                                                            | Figure 1<br>Page 7 – lines 73-74                                         |
| Quantitative variables    | 11      | Explain how quantitative variables were handled in the analyses. If applicable, describe which groupings were chosen and why                                                         | Page 7 – lines 61-71                                                     |
| Statistical methods       | 12      | (a) Describe all statistical methods, including those used to control for confounding                                                                                                | Page 7 – lines 66 - 71                                                   |
|                           |         | (b) Describe any methods used to examine subgroups and interactions                                                                                                                  | Page 7 – lines 66 - 71                                                   |
|                           |         | (c) Explain how missing data were addressed                                                                                                                                          | Figure 1                                                                 |
|                           |         | (d) If applicable, describe analytical methods taking account of sampling strategy                                                                                                   | Not applicable                                                           |
|                           |         | (e) Describe any sensitivity analyses                                                                                                                                                | Not applicable                                                           |
| <b>Results</b>            |         |                                                                                                                                                                                      |                                                                          |
| Participants              | 13*     | (a) Report numbers of individuals at each stage of study—eg numbers potentially eligible, examined for eligibility, confirmed                                                        | Figure 1                                                                 |

|                          |     |                                                                                                                                                                                                              |                                         |
|--------------------------|-----|--------------------------------------------------------------------------------------------------------------------------------------------------------------------------------------------------------------|-----------------------------------------|
|                          |     | eligible, included in the study, completing follow-up, and analysed                                                                                                                                          |                                         |
|                          |     | (b) Give reasons for non-participation at each stage                                                                                                                                                         | Not applicable                          |
|                          |     | (c) Consider use of a flow diagram                                                                                                                                                                           | Figure 1                                |
| Descriptive data         | 14* | (a) Give characteristics of study participants (eg demographic, clinical, social) and information on exposures and potential confounders                                                                     | Figure 2                                |
|                          |     | (b) Indicate number of participants with missing data for each variable of interest                                                                                                                          | Figure 1<br>Table 1                     |
| Outcome data             | 15* | Report numbers of outcome events or summary measures                                                                                                                                                         | Page 7 - 8 –<br>line 75 - 88            |
| Main results             | 16  | (a) Give unadjusted estimates and, if applicable, confounder-adjusted estimates and their precision (eg, 95% confidence interval). Make clear which confounders were adjusted for and why they were included | Table 1<br>Page 7 - 8 –<br>line 73 - 83 |
|                          |     | (b) Report category boundaries when continuous variables were categorized                                                                                                                                    | Not applicable                          |
|                          |     | (c) If relevant, consider translating estimates of relative risk into absolute risk for a meaningful time period                                                                                             | Not applicable                          |
| Other analyses           | 17  | Report other analyses done—eg analyses of subgroups and interactions, and sensitivity analyses                                                                                                               | Not applicable                          |
| <b>Discussion</b>        |     |                                                                                                                                                                                                              |                                         |
| Key results              | 18  | Summarise key results with reference to study objectives                                                                                                                                                     | Page 8_9 –<br>lines 95-108              |
| Limitations              | 19  | Discuss limitations of the study, taking into account sources of potential bias or imprecision. Discuss both direction and magnitude of any potential bias                                                   | Page 11 - 12 –<br>lines 164- 192        |
| Interpretation           | 20  | Give a cautious overall interpretation of results considering objectives, limitations, multiplicity of analyses, results from similar studies, and other relevant evidence                                   | Page 9-11 –<br>lines 103-163            |
| Generalisability         | 21  | Discuss the generalisability (external validity) of the study results                                                                                                                                        | Page 11 - 12 –<br>lines 170- 196        |
| <b>Other information</b> |     |                                                                                                                                                                                                              |                                         |
| Funding                  | 22  | Give the source of funding and the role of the funders for the present study and, if applicable, for the original study on which the present article is based                                                | Page 14 – lines<br>270-275              |

\*Give information separately for exposed and unexposed groups.

**Note:** An Explanation and Elaboration article discusses each checklist item and gives methodological background and published examples of transparent reporting. The STROBE checklist is best used in conjunction with this article (freely available on the Web sites of PLoS Medicine at <http://www.plosmedicine.org/>, Annals of Internal Medicine at <http://www.annals.org/>, and Epidemiology at <http://www.epidem.com/>). Information on the STROBE Initiative is available at [www.strobe-statement.org](http://www.strobe-statement.org).
