# Supplementary material for: Characteristics of pharmacist’s interventions triggered by prescribing errors related to computerised physician order entry in French hospitals: a cross-sectional observational study
Source: PubMed Central journal article supplement — BMJ Open. 2021 Oct 10;11(10):e045778. doi: 10.1136/bmjopen-2020-045778 (PMC8506887; doi:10.1136/bmjopen-2020-045778), 2021-10-10
Supplement: bmjopen-2020-045778supp001.pdf [file bmjopen-2020-045778supp001.pdf]

## Appendix 1. The Pharmacist intervention form

| <b>PHARMACIST INTERVENTION FORM</b>                                                                                     |                                                                                                                                                                       |
|-------------------------------------------------------------------------------------------------------------------------|-----------------------------------------------------------------------------------------------------------------------------------------------------------------------|
| 📅 <b>DATE:</b> /    /                                                                                                   | 📁 <b>INTERVENTION N°:</b>                                                                                                                                             |
| 🏠 <b>CENTER N°:</b>                                                                                                     |                                                                                                                                                                       |
| <b>PATIENT:</b>                                                                                                         | <b>Hospital ward:</b>                                                                                                                                                 |
| Last name:<br>First name:                                                                                               | <input type="checkbox"/> Psychiatry<br><input type="checkbox"/> Acute care<br><input type="checkbox"/> Long term care<br><input type="checkbox"/> Rehabilitation ward |
| Age:            years / Weight:    Kg<br>Sex: <input type="checkbox"/> M <input type="checkbox"/> F                     | <b>DRUG NAME (INN):</b>                                                                                                                                               |
| <b>1- DRUG RELATED PROBLEM</b> (1 choice):                                                                              | <b>3- DRUG CLASSIFICATION (ATC):</b>                                                                                                                                  |
| 1 <input type="checkbox"/> Non conformity to guidelines or contra-indication                                            | <input type="checkbox"/> A Alimentary tract & metabolism                                                                                                              |
| 2 <input type="checkbox"/> Untreated indication                                                                         | <input type="checkbox"/> B Blood & blood forming organs                                                                                                               |
| 3 <input type="checkbox"/> Subtherapeutic dosage                                                                        | <input type="checkbox"/> C Cardiovascular system                                                                                                                      |
| 4 <input type="checkbox"/> Supratherapeutic dosage                                                                      | <input type="checkbox"/> D Dermatological                                                                                                                             |
| 5 <input type="checkbox"/> Drug without indication                                                                      | <input type="checkbox"/> G Genito urinary system & sex hormones                                                                                                       |
| 6 <input type="checkbox"/> Drug interaction                                                                             | <input type="checkbox"/> H Systemic hormonal preparations                                                                                                             |
| <input type="radio"/> To be taken into account                                                                          | <input type="checkbox"/> J Anti-infective for systemic use                                                                                                            |
| <input type="radio"/> Use with caution                                                                                  | <input type="checkbox"/> L Anti-neoplastic & immunomodulating agents                                                                                                  |
| <input type="radio"/> Combination to be avoided                                                                         | <input type="checkbox"/> M Musculo-skeletal system                                                                                                                    |
| <input type="radio"/> Combination contra-indicated                                                                      | <input type="checkbox"/> N Nervous system                                                                                                                             |
| <input type="radio"/> Documented but not in VIDAL®                                                                      | <input type="checkbox"/> P Antiparasitic products                                                                                                                     |
| 7 <input type="checkbox"/> Adverse drug reaction                                                                        | <input type="checkbox"/> R Respiratory system                                                                                                                         |
| 8 <input type="checkbox"/> Improper administration                                                                      | <input type="checkbox"/> S Sensory organs                                                                                                                             |
| 9 <input type="checkbox"/> Failure to receive drug                                                                      | <input type="checkbox"/> V Various                                                                                                                                    |
| 10 <input type="checkbox"/> Drug monitoring                                                                             |                                                                                                                                                                       |
| <b>2- INTERVENTION</b> (1 choice):                                                                                      | <b>4- INTERVENTION FOLLOW-UP:</b>                                                                                                                                     |
| 1 <input type="checkbox"/> Addition of a new drug                                                                       | <input type="checkbox"/> Accepted                                                                                                                                     |
| 2 <input type="checkbox"/> Drug discontinuation                                                                         | <input type="checkbox"/> Non accepted                                                                                                                                 |
| 3 <input type="checkbox"/> Drug switch                                                                                  | <input type="checkbox"/> Non assessable                                                                                                                               |
| 4 <input type="checkbox"/> Change of administration route                                                               |                                                                                                                                                                       |
| 5 <input type="checkbox"/> Drug monitoring                                                                              |                                                                                                                                                                       |
| 6 <input type="checkbox"/> Administration modalities optimisation                                                       |                                                                                                                                                                       |
| 7 <input type="checkbox"/> Dose adjustment                                                                              |                                                                                                                                                                       |
| <b>DETAILS</b> ⇒ If necessary, give details on any aspects of the detected DRP and describe the intervention, precisely |                                                                                                                                                                       |
| <b>Context</b>                                                                                                          |                                                                                                                                                                       |
| <b>Problem</b>                                                                                                          |                                                                                                                                                                       |
| <b>Intervention</b>                                                                                                     |                                                                                                                                                                       |
