# Supplementary material for: Characteristics of pharmacist’s interventions triggered by prescribing errors related to computerised physician order entry in French hospitals: a cross-sectional observational study
Source: PubMed Central journal article supplement — BMJ Open. 2021 Oct 10;11(10):e045778. doi: 10.1136/bmjopen-2020-045778 (PMC8506887; doi:10.1136/bmjopen-2020-045778), 2021-10-10
Supplement: bmjopen-2020-045778supp002.pdf [file bmjopen-2020-045778supp002.pdf]

## Appendix 2. Examples of PISRE and drug by drug-related problems (N = 27,822)

| Drug-related problem                          | Number of drugs involved – n (%) | Most frequent drug ( <b>international nonproprietary names</b> ) (n)                                             | Examples                                                                                                          |
|-----------------------------------------------|----------------------------------|------------------------------------------------------------------------------------------------------------------|-------------------------------------------------------------------------------------------------------------------|
| Supratherapeutic dosage                       | 7,571 (27.2)                     | Paracetamol (1,043), tramadol (223), pantoprazole (212), enoxaparin (204)                                        | “Duplicate prescription: 1 in predefined protocol and 1 outside predefined protocol = 8 g of paracetamol per day” |
| Non-conformity to guidelines/contraindication | 6,212 (22.3)                     | Alfuzosin (515), dutasteride (493), silodosin (469), paracetamol (460), tamsulosin (373)                         | “prescription of dutasteride, which is not in the hospital drug formulary, with a risk of treatment omission”     |
| Improper administration                       | 4,972 (17.9)                     | Paracetamol (277), levothyroxine (130), pregabalin (130), methylprednisolone (124)                               | “selection of IV terbutaline for administration by aerosol”                                                       |
| Subtherapeutic dosage                         | 4,738 (17.0)                     | Enoxaparin (965), heparin (450), tinzaparin (186), paracetamol (140), macrogol (105),                            | “Enoxaparin 4000 UI/0.4 ml prescription: 1 IU instead of 1 syringe”                                               |
| Untreated indication                          | 2,441 (8.8)                      | acetylsalicylic acid (82), pregabalin (80), paracetamol (74), tinzaparin (69), bisoprolol (69), enoxaparin (68), | “prescription of pregabalin not renewed (hospital stay longer than the duration of the prescription)”             |

|                         |             |                                                                                                                           |                                                                                                                                                                                 |
|-------------------------|-------------|---------------------------------------------------------------------------------------------------------------------------|---------------------------------------------------------------------------------------------------------------------------------------------------------------------------------|
| Drug without indication | 1,340 (4.8) | Pantoprazole (66), amoxicillin and beta-lactamase inhibitor (44), cholecalciferol (40), ceftriaxone (34), enoxaparin (30) | “duplicate prescription of pantoprazole per os and IV by two prescribers”                                                                                                       |
| Drug interaction        | 262 (0.9)   | Amiodarone (27), fluindione (9), levothyroxine (9)                                                                        | “cordarone and escitalopram combination contra-indicated: risk of “torsade de pointes” not modified during drug interaction alert with Clinical Decision Support System (CDSS)” |
| Drug monitoring         | 124 (0.4)   | Fluindione (25), polystyrene sulfonate (8), paracetamol (4)                                                               |                                                                                                                                                                                 |
| Adverse drug reaction   | 70 (0.3)    | Polystyrene sulfonate (11), furosemide (6), atorvastatin (4), tramadol (3), macrogol (3)                                  | “increased risk of adverse reactions by the combination of atorvastatin and fenofibrate”                                                                                        |
| Failure to receive drug | 92 (0.3)    | Esomeprazole (3), cholecalciferol (3), acetylsalicylic acid (3), furosemide (3)                                           | “Prescription of furosemide not appearing on the nursing plan”                                                                                                                  |
